# Supplementary material for: Dynamic gene expressions of peripheral blood mononuclear cells in patients with acute exacerbation of chronic obstructive pulmonary disease: a preliminary study
Source: PubMed Central journal article supplement (PMC4305227; doi:10.1186/s13054-014-0508-y), 2014-11-19

| SEQ_ID    | Fold change | Log Fold of Absolute F-Regulation | Fold change Log Fold of Absolute F-Regulation | Fold change Log Fold of Absolute F-Regulation | Fold change Log Fold of Absolute F-Regulation | FC[log2] (Stable) | FC[log2] (AE-1) | FC[log2] (AE-3) | FC[log2] (AE-10) | GENE      | SYNONYM   | DESCRIPTION | NCBI      | GENCHROMO | STRAND     | START             | STOP          | GO        | biological GO | cellular GO       | molecular GO | UniGene | Dbid  | TIGRID    |           |             |            |            |            |            |           |           |          |
|-----------|-------------|-----------------------------------|-----------------------------------------------|-----------------------------------------------|-----------------------------------------------|-------------------|-----------------|-----------------|------------------|-----------|-----------|-------------|-----------|-----------|------------|-------------------|---------------|-----------|---------------|-------------------|--------------|---------|-------|-----------|-----------|-------------|------------|------------|------------|------------|-----------|-----------|----------|
| NM_03180  | 5.053987    | 2.337422                          | 5.053987                                      | 8.482920                                      | 3.084558                                      | 8.482920          | 8.392629        | 5.069128        | 8.392629         | 6.035794  | 2.953453  | 6.035794    | 189.31242 | 956.7825  | 16059.9188 | 1588.8289         | 1425.6508     | DKCZP541  | MGC10500      | hypochlorite      | 283846       | chr18   | -     | 11609741  | 11623796  | GO:0008159  | GO:0005778 | GO:0006016 | Ha.552700  | gBd        | A314      | TICR1D    |          |
| NM_010935 | 5.020261    | 2.416533                          | 5.020261                                      | 7.194262                                      | 2.826848                                      | 7.194262          | 7.542684        | 2.913467        | 7.542684         | 308.1064  | 2.913467  | 308.1064    | 209.12278 | 3.546571  | 2097.0261  | 2525.0251         | 4102.118      | FNPA1     | FB161ECL      | ephrin-A1         | 1942         | chr11   | -     | 15336972  | 15374010  | GO:0007226  | GO:0005858 | GO:0004687 | Ha.516664  | reFNM_004  | THC24678  |           |          |
| NM_009295 | 5.130059    | 2.358974                          | 5.130059                                      | 11.605559                                     | 3.536744                                      | 11.605559         | 9.255011        | 3.120346        | 9.255011         | 22.13182  | 4.668465  | 22.13182    | 27.47131  | 1409.2943 | 3188.199   | 2524.917          | 6081.684      | LKOC53722 | -             | -                 | -            | -       | chr19 | -         | 5683824   | 5684423     | -          | -          | -          | -          | -         | -         |          |
| NM_01925  | 5.179447    | 2.327298                          | 5.179447                                      | 83.86752                                      | 3.900044                                      | 83.86752          | 72.62577        | 3.182047        | 72.62577         | 51.64661  | 1634.821  | 2472.457    | 21.41082  | DEF4A     | DEF4H      | defensin, alpha 1 | 1669          | chr2      | -             | -                 | -            | -       | -     | -         | 6780574   | 6783196     | GO:0006800 | GO:0005575 | GO:0004254 | Ha.591391  | reFNM_002 | THC24718  |          |
| BC018523  | 5.1999545   | 2.378499                          | 5.1999545                                     | 19.592552                                     | 4.292233                                      | 19.592552         | 25.329245       | 4.627232        | 25.329245        | 7.013664  | 2.8101683 | 7.013664    | 1883.807  | 9795.938  | 36909.445  | 47216.516         | 13212.605     | LTF       | GLG12H1F      | lactoferrin       | 4057         | chr2    | -     | 40652162  | 40648140  | GO:0006081  | GO:0005575 | GO:0004254 | Ha.529517  | reFNM_002  | THC24851  |           |          |
| NM_133505 | 5.2028546   | 2.379035                          | 5.2028546                                     | 34.860336                                     | 5.1235147                                     | 34.860336         | 39.959152       | 5.320454        | 39.959152        | 47.89806  | 5.5819954 | 47.89806    | 105.72747 | 550.08466 | 3685.0953  | 4224.7803         | 5064.1006     | DCN       | DSPG2         | PG4               | ecoron       | 1634    | chr2  | -         | 94002655  | 94009640    | GO:0009888 | GO:0005575 | GO:0005511 | Ha.156316  | reFNM_001 | THC25247  |          |
| NM_001005 | 5.2263603   | 2.388806                          | 5.2263603                                     | 22.848629                                     | 4.5140357                                     | 22.848629         | 16.197774       | 4.027698        | 16.197774        | 9.757754  | 3.286549  | 9.757754    | 158.76872 | 8293.2653 | 3627.6477  | 2587.926          | 1549.2261     | ATP1B1    | ATP1B1        | ATPase, Na/K      | 481          | chr1    | -     | 167342570 | 167368884 | GO:0006081  | GO:0005890 | GO:0005575 | Ha.291196  | reFNM_001  | THC25382  |           |          |
| NM_010935 | 5.2026261   | 2.416533                          | 5.2026261                                     | 8.780781                                      | 3.1224575                                     | 8.780781          | 10.48613        | 3.2904104       | 10.48613         | 10.172728 | 3.546571  | 10.172728   | 240.79668 | 1374.368  | 2097.0261  | 2525.0251         | 4102.118      | FNPA1     | FB161ECL      | ephrin-A1         | 1942         | chr11   | -     | 65390394  | 65397899  | GO:0007226  | GO:0005858 | GO:0004687 | Ha.516664  | reFNM_016  | THC15559  |           |          |
| NM_010018 | 5.3622456   | 2.422873                          | 5.3622456                                     | 23.78455                                      | 4.571953                                      | 23.78455          | 16.29977        | 4.18087         | 16.29977         | 20.31058  | 4.343483  | 20.31058    | 30.98657  | 120.8205  | 7230.1836  | 5133.4277         | 6112.499      | SCN11A    | ATP2B4        | ATPase, Na/K      | 6337         | chr12   | -     | 6326273   | 6354796   | GO:0006081  | GO:0005575 | GO:0005523 | Ha.591047  | reFNM_001  | THC25918  |           |          |
| NM_93461  | 5.49468     | 2.458055                          | 5.49468                                       | 5.7801957                                     | 2.531184                                      | 5.7801957         | 6.847401        | 2.755566        | 6.847401         | 5.1561046 | 2.6622815 | 5.1561046   | 434.13446 | 2385.43   | 2509.3823  | 2972.6299         | 2238.4246     | RLG1      | GLG12585M     | laminin           | 57139        | chr19   | -     | 11365744  | 11309957  | GO:0007116  | GO:0005662 | GO:0005088 | Ha.375142  | enSTO      | THC251173 |           |          |
| NM_050448 | 5.5001073   | 2.4589458                         | 5.5001073                                     | 30.251492                                     | 4.9194833                                     | 30.251492         | 49.993004       | 6.364563        | 49.993004        | 27.046692 | 7.0757267 | 27.046692   | 128.30162 | 705.67267 | 3881.3152  | 6474.1836         | 3404.1634     | HLC3      | MJC1114       | haplotaglin       | 3245         | chr19   | -     | 76044008  | 76052458  | GO:0006500  | GO:0005575 | GO:0004254 | Ha.513711  | reFNM_005  | THC26053  |           |          |
| AY327595  | 5.547538    | 2.4718475                         | 5.547538                                      | 5.924253                                      | 2.566632                                      | 5.924253          | 8.356234        | 2.6062829       | 8.356234         | 1269.9286 | 7044.9766 | 7509.496    | 7523.378  | 10611.82  | 10611.82   | 10611.82          | 10611.82      | CG127     | FB127EM       | myosin            | 418          | chr2    | -     | 153425222 | 153429282 | GO:0005575  | GO:0004254 | Ha.579973  | reFNM_002  | THC24671   |           |           |          |
| BC104987  | 5.5692067   | 2.4774718                         | 5.5692067                                     | 12.916048                                     | 3.647515                                      | 12.916048         | 5.706553        | 3.2512619       | 5.706553         | 10.16728  | 5.266728  | 12.72807    | 580.2012  | 521.1857  | B4GAL1     | B4GAL1            | UDP-Galactase | 933       | chr20         | -                 | -            | -       | -     | -         | 47689599  | 47763667    | GO:0005970 | GO:01602   | GO:0008377 | Ha.370487  | reFNM_004 | THC24671  |          |
| BC098342  | 5.5747455   | 2.5217521                         | 5.5747455                                     | 6.702051                                      | 2.578098                                      | 6.702051          | 8.127568        | 3.0228238       | 8.127568         | 11.03481  | 683.4987  | 1156.3528   | 1292.4212 | 1102.8944 | 1102.8944  | 1102.8944         | 1102.8944     | CSDMG1    | CSDMG1        | cytosine synthase | 4280         | chr12   | -     | 15345222  | 153429282 | GO:00019752 | GO:0005575 | GO:0003377 | Ha.89063   | reFNM_005  | THC24759  |           |          |
| BC021584  | 5.841166    | 2.56997                           | 5.841166                                      | 8.583511                                      | 3.0623114                                     | 8.583511          | 9.64278         | 3.269492        | 9.64278          | 11.540425 | 3.2528425 | 11.540425   | 202.74951 | 1190.4237 | 7340.4067  | 8474.135          | 30301.451     | MFAP4     | -             | -                 | -            | -       | chr1  | -         | 19227569  | 19259284    | GO:0007115 | GO:0001512 | GO:0003377 | Ha.296049  | reFNM_002 | THC211437 |          |
| BC062415  | 5.874101    | 2.537047                          | 5.874101                                      | 41.61852                                      | 5.3710896                                     | 41.61852          | 5.706553        | 3.2512619       | 5.706553         | 3.5355713 | 2.4156427 | 3.5355713   | 11.54866  | 681.0051  | 612.2913   | 662.5035          | 616.18695     | N/A       | N/A           | Myosin sapie      | N/A          | chr14   | -     | 23993419  | 239952779 | -           | -          | -          | -          | -          | -         |           |          |
| NM_100245 | 5.896833    | 2.559943                          | 5.896833                                      | 5.1390064                                     | 2.4065113                                     | 5.1390064         | 5.282973        | 2.520226        | 5.282973         | 12.726988 | 777.4048  | 2306.738    | 2969.048  | 3082.6072 | LITBP2     | LITBP2            | laminin       | 4053      | chr2          | -                 | -            | -       | -     | -         | -         | 4470638     | 4471887    | GO:0000070 | GO:0005575 | GO:0005509 | Ha.512776 | reFNM_000 | THC24811 |
| NM_001296 | 5.910528    | 2.611510                          | 5.910528                                      | 42.204933                                     | 5.3993397                                     | 42.204933         | 24.68008        | 4.622278        | 24.68008         | 6.537094  | 2.6683074 | 6.537094    | 46.80358  | 2835.5742 | 19449.547  | 11347.4407        | 2929.577      | CEACAM6   | CD66G         | carcinoembryonic  | 1084         | chr19   | -     | 46992243  | 47007148  | -           | -          | -          | -          | -          | -         |           |          |
| BC098342  | 5.5747455   | 2.5217521                         | 5.5747455                                     | 11.605559                                     | 3.536744                                      | 11.605559         | 9.255011        | 3.120346        | 9.255011         | 11.03481  | 683.4987  | 1156.3528   | 1292.4212 | 1102.8944 | 1102.8944  | 1102.8944         | 1102.8944     | CSDMG1    | CSDMG1        | cytosine synthase | 4280         | chr12   | -     | 15345222  | 153429282 | GO:00019752 | GO:0005575 | GO:0003377 | Ha.89063   | reFNM_005  | THC24759  |           |          |
| NM_007278 | 6.272283    | 2.650403                          | 6.272283                                      | 15.415518                                     | 3.946315                                      | 15.415518         | 17.160553       | 4.110224        | 17.160553        | 212.4045  | 1334.8047 | 3277.9636   | 3640.0286 | 4473.594  | FKBP9      | ATP2C2            | FK506         | bind      | 11238         | chr7              | -            | -       | -     | -         | -         | 32962576    | 33013067   | GO:0006458 | GO:0003775 | Ha.103934  | reFNM_001 | THC251319 |          |
| NM_02525  | 6.333117    | 2.6629157                         | 6.333117                                      | 13.862817                                     | 3.7931485                                     | 13.862817         | 9.980825        | 4.176806        | 9.980825         | 6.981393  | 2.80515   | 6.981393    | 16.92781  | 1063.5121 | 2327.9648  | 3036.2727         | 1127.3763     | CLA0A     | Cor2E92C      | actin             | cor2         | 80776   | chr16 | -         | 3193974   | 31954736    | -          | -          | -          | -          | -         | -         |          |
| AK02438   | 6.3402376   | 2.6624537                         | 6.3402376                                     | 7.5230184                                     | 2.9113116                                     | 7.5230184         | 8.980759        | 3.159423        | 8.980759         | 6.2480796 | 2.6517015 | 6.2480796   | 13.5252   | 833.9011  | 989.4665   | 1309.8064         | 826.5149      | FLJ14327  | -             | -                 | -            | -       | chr1  | -         | 80158915  | 80164449    | -          | -          | -          | -          | -         | -         |          |
| NM_00018  | 6.4326296   | 2.684806                          | 6.4326296                                     | 17.679386                                     | 4.1439962                                     | 17.679386         | 18.85934        | 4.267554        | 18.85934         | 10.989832 | 3.579792  | 10.989832   | 40.43463  | 2595.157  | 7132.5808  | 7036.1166         | 4433.354      | COL3A1    | MGC9568       | collagen, type    | 1295         | chr3    | -     | 100840413 | 100997848 | GO:0006081  | GO:0005575 | GO:0005519 | Ha.654548  | reFNM_001  | THC24720  |           |          |
| NM_001296 | 5.910528    | 2.611510                          | 5.910528                                      | 56.182167                                     | 5.8120403                                     | 56.182167         | 36.949802       | 5.2760497       | 36.949802        | 36.949802 | 3.144237  | 36.949802   | 17.47623  | 839.0219  | 7611.895   | 5306.8516         | 4710.224      | FN1       | CG1CZP        | fibronectin       | 1235         | chr3    | -     | 21593421  | 21600936  | GO:0006095  | GO:0005575 | GO:0005020 | Ha.654548  | reFNM_005  | THC24720  |           |          |
| NM_004435 | 6.601213    | 2.727361                          | 6.601213                                      | 22.598763                                     | 5.0267455                                     | 22.598763         | 38.844537       | 5.279633        | 38.844537        | 37.7369   | 4.3028235 | 37.7369     | 18.7269   | 4.3028235 | 6637.207   | 7908.8286         | 4014.493      | ELF3      | EPF-1         | ERT               | 7-E4-like    | 1999    | chr1  | -         | 200243695 | 200251756   | GO:0006353 | GO:0005653 | GO:0000176 | Ha.67928   | reFNM_004 | THC25523  |          |
| BC048333  | 6.6380895   | 2.729681                          | 6.6380895                                     | 16.100217                                     | 4.0143747                                     | 16.100217         | 8.494577        | 3.086542        | 8.494577         | 11.1159   | 3.4801336 | 11.1159     | 8.494577  | 3.086542  | 8.494577   | 8.494577          | 8.494577      | KIAA070A  | ATP2C2        | FK506             | bind         | 11238   | chr7  | -         | 83959633  | 8305202     | GO:0006081 | GO:01602   | GO:0000176 | Ha.67928   | reFNM_004 | THC26496  |          |
| NM_123498 | 6.710685    | 2.746611                          | 6.710685                                      | 10.401051                                     | 3.3786753                                     | 10.401051         | 12.157213       | 3.6037407       | 12.157213        | 27.100206 | 2.760232  | 27.100206   | 132.8199  | 314.123   | 1813.4666  | 1614.72           | 3599.447      | N/A       | N/A           | Myosin sapie      | N/A          | chr21   | -     | 41758354  | 41760885  | -           | -          | -          | -          | -          | -         |           |          |
| NM_00577  | 6.73734     | 2.7521791                         | 6.73734                                       | 12.58744                                      | 3.852009                                      | 12.58744          | 10.137152       | 3.341804        | 10.137152        | 815.9848  | 5496.961  | 11782.093   | 10270.63  | 820.849   | PRSS8      | CAP1              | PROS          | protease  | 5652          | chr16             | -            | -       | -     | -         | -         | 31050256    | 31054662   | GO:0006500 | GO:0005575 | GO:0004254 | Ha.75799  | reFNM_002 | THC61592 |
| NM_004435 | 6.601213    | 2.727361                          | 6.601213                                      | 13.744004                                     | 3.782703                                      | 13.744004         | 10.73359        | 3.4240068       | 10.73359         | 15.420822 | 1043.4504 | 2122.8458   | 6004.684  | 1655.2079 | 810.275    | 810.275           | 810.275       | HIT1      | 75635         | immunoglobulin    | 3671         | chr15   | -     | 72253139  | 72256265  | GO          |            |            |            |            |           |           |          |

|           |           |           |           |      |           |           |           |      |            |           |           |      |            |           |           |      |            |           |           |           |           |           |                     |                     |       |          |           |                                         |                                          |                      |  |
|-----------|-----------|-----------|-----------|------|-----------|-----------|-----------|------|------------|-----------|-----------|------|------------|-----------|-----------|------|------------|-----------|-----------|-----------|-----------|-----------|---------------------|---------------------|-------|----------|-----------|-----------------------------------------|------------------------------------------|----------------------|--|
| AL173101  | -6.119443 | -2.613401 | 6.119443  | down | -9.489696 | -3.246362 | 9.489696  | down | -9.541381  | -3.254198 | 9.541381  | down | -10.00003  | -3.321932 | 10.000026 | down | 4347.295   | 710.40686 | 458.1069  | 455.62534 | 434.72836 | C21orf7   | TAKIL               | chromosom:6911      | chr21 | +        | 2942486   | 29470064                                | GO:000551:hs.222802                      | ref:NM_020THC61828   |  |
| XM_93159  | -6.186644 | -2.629157 | 6.186644  | down | -11.41454 | -3.512801 | 11.414543 | down | -9.541708  | -2.522083 | 9.541707  | down | -7.402883  | -2.888087 | 7.402883  | down | 1313.487   | 212.30391 | 115.06802 | 228.66019 | 177.42395 | LOC643514 | hypothetical:643514 | chr8                | +     | 10002766 | 10002747  |                                         |                                          |                      |  |
| NM_13836  | -6.276377 | -2.649932 | 6.276377  | down | -11.5046  | -3.524139 | 11.504601 | down | -7.347457  | -2.877245 | 7.347456  | down | -10.00002  | -3.322623 | 10.000021 | down | 2227.4153  | 354.88887 | 193.61082 | 303.15457 | 221.62793 | NRP2      | hypothetical:47553  | chr12               | +     | 43188331 | 43564605  | GO:000715:GO:000557:GO:000519:hs.505326 | ref:NM_006THC251221                      |                      |  |
| NM_002346 | -6.692009 | -2.742439 | 6.692008  | down | -8.152088 | -3.027171 | 8.152088  | down | -7.358062  | -2.879926 | 7.358062  | down | -6.52728   | -2.706482 | 6.52728   | down | 1991.0325  | 297.52339 | 244.23857 | 270.9195  | 305.03247 | LY9       | CD229:SLA           | lymphocyte:4063     | chr2  | +        | 15903251  | 15906469                                | GO:000715:GO:001602:GO:000367:hs.403857  | ref:NM_002THC260375  |  |
| XM_93485  | -6.890036 | -2.784512 | 6.890036  | down | -14.58177 | -3.862766 | 14.58177  | down | -11.224681 | -3.679233 | 11.224675 | down | -9.41295   | -3.234647 | 9.41295   | down | 2026.3582  | 294.0998  | 139.28612 | 157.23189 | 215.27347 | LY9       | CD229:SLA           | lymphocyte:4063     | chr2  | +        | 84911269  | 84961721                                |                                          |                      |  |
| BC062589  | -6.941211 | -2.795188 | 6.941211  | down | -7.265337 | -2.86103  | 7.265336  | down | -7.124588  | -2.832807 | 7.124588  | down | -5.465092  | -2.450246 | 5.465092  | down | 11661.9404 | 239.8631  | 229.16219 | 233.68936 | 304.65002 | LY9       | CD229:SLA           | lymphocyte:4063     | chr1  | +        | 159059026 | 159064667                               | GO:000715:GO:001602:GO:000367:hs.403857  | ref:NM_002THC260375  |  |
| XM_93414  | -7.021789 | -2.811839 | 7.021789  | down | -7.540285 | -2.914619 | 7.540284  | down | -11.021269 | -3.488859 | 11.022674 | down | -6.198253  | -2.631862 | 6.198253  | down | 1631.8488  | 161.19093 | 105.1609  | 100.81781 | 182.6077  | KIAA0748  | HSPC257             | KIAA0748            | 9840  | chr12    | +         | 53629494                                | 5363930                                  |                      |  |
| BC085067  | -7.292628 | -2.866441 | 7.292628  | down | -6.276096 | -2.650005 | 6.276096  | down | -7.512347  | -2.909264 | 7.512346  | down | -7.71396   | -2.947272 | 7.713959  | down | 4777.2285  | 655.07575 | 671.1056  | 635.61993 | 619.29625 | C7orf7    | TAKIL               | chromosom:6911      | chr21 | +        | 29424676  | 29497499                                |                                          |                      |  |
| NM_13836  | -7.786442 | -2.869964 | 7.786442  | down | -6.35867  | -2.668725 | 6.358669  | down | -5.867333  | -2.527705 | 5.867332  | down | -5.233062  | -2.387655 | 5.233062  | down | 3097.3176  | 397.78345 | 487.1015  | 57.80197  | 591.8749  | CD2345    | colicoid:490799     | chr7                | +     | 59933619 | 59964526  | GO:000551:hs.569713                     | ref:NM_001THC402281                      |                      |  |
| BC072140  | -7.842644 | -2.971734 | 7.842644  | down | -11.48244 | -4.564306 | 11.48244  | down | -18.04891  | -4.17672  | 18.04974  | down | -32.289579 | -5.017925 | 32.285053 | down | 7126.6793  | 908.711   | 161.42409 | 394.0673  | 220.74294 | UNQ470    | CAA1470             | 375704              | chr7  | +        | 3451104   | 34513027                                |                                          |                      |  |
| BC027920  | -7.863331 | -2.975141 | 7.863331  | down | -6.237559 | -2.640982 | 6.2375593 | down | -5.838262  | -2.455539 | 5.838261  | down | -5.345279  | -2.418265 | 5.345279  | down | 2220.777   | 282.4194  | 356.8302  | 380.3827  | 415.46515 | LY9       | CD229:SLA           | lymphocyte:4063     | chr1  | +        | 15903261  | 159064667                               | GO:000715:GO:001602:GO:000367:hs.403857  | ref:NM_002THC260375  |  |
| BC038996  | -8.122065 | -3.037745 | 8.122065  | down | -8.16998  | -3.029804 | 8.169988  | down | -10.57849  | -3.403062 | 10.578494 | down | -9.816098  | -3.310748 | 9.816098  | down | 1317.6743  | 160.4559  | 161.3415  | 124.56162 | 133.62349 | AK5       | AK6:MGK3            | adenylate:ki:26289  | chr1  | +        | 77520874  | 77797007                                | GO:000613:GO:000573:GO:000178:hs.559718  | ref:NM_1474THC248432 |  |
| NM_085151 | -10.74784 | -3.425974 | 10.747836 | down | -8.720418 | -3.124397 | 8.720418  | down | -5.104356  | -2.351729 | 5.104356  | down | -7.382225  | -2.884056 | 7.382224  | down | 1156.867   | 107.6372  | 132.66188 | 226.64308 | 156.70981 | YPLM1     | C14orf170:YLP       | motif:c6252         | chr14 | +        | 74299827  | 74372853                                | GO:0008159:GO:000557:GO:000367:hs.531111 | gb:BC0235THC275442   |  |
| NM_01455  | -16.80003 | -4.07198  | 16.800032 | down | -21.7658  | -4.443991 | 21.7658   | down | -32.03665  | -5.001681 | 32.036648 | down | -14.88979  | -3.890252 | 14.889792 | down | 4558.0938  | 283.46298 | 209.41559 | 142.27748 | 386.12207 | TF1PCL1   | CRTR1:LB            | transcription:29842 | chr4  | -        | 121695003 | 121759245                               | GO:000012:GO:000563:GO:000370:hs.156471  | ref:NM_014THC215106  |  |
| NM_01016  | -21.03073 | -3.944427 | 21.030733 | down | -27.92748 | -4.803614 | 27.927485 | down | -18.68745  | -4.222998 | 18.687447 | down | -18.59982  | -3.810522 | 18.599817 | down | 4255.381   | 201.39006 | 151.66537 | 226.64308 | 227.71089 | SCP2      | DKFZ:26868          | steroid:camer6342   | chr1  | +        | 53165555  | 53232492                                | GO:000669:GO:000573:GO:000549:hs.476365  | ref:NM_002THC269388  |  |

|            |           |           |           |           |           |                     |                     |       |          |           |                                         |                                          |                      |  |
|------------|-----------|-----------|-----------|-----------|-----------|---------------------|---------------------|-------|----------|-----------|-----------------------------------------|------------------------------------------|----------------------|--|
| 1313.487   | 212.30391 | 115.06802 | 228.66019 | 177.42395 | LOC643514 | hypothetical:643514 | chr8                | +     | 10002766 | 10002747  |                                         |                                          |                      |  |
| 2227.4153  | 354.88887 | 193.61082 | 303.15457 | 221.62793 | NRP2      | hypothetical:47553  | chr12               | +     | 43188331 | 43564605  | GO:000715:GO:000557:GO:000519:hs.505326 | ref:NM_006THC251221                      |                      |  |
| 1991.0325  | 297.52339 | 244.23857 | 270.9195  | 305.03247 | LY9       | CD229:SLA           | lymphocyte:4063     | chr2  | +        | 15903251  | 15906469                                | GO:000715:GO:001602:GO:000367:hs.403857  | ref:NM_002THC260375  |  |
| 2026.3582  | 294.0998  | 139.28612 | 157.23189 | 215.27347 | LY9       | CD229:SLA           | lymphocyte:129293   | chr2  | +        | 84911269  | 84961721                                |                                          |                      |  |
| 11661.9404 | 239.8631  | 229.16219 | 233.68936 | 304.65002 | LY9       | CD229:SLA           | lymphocyte:4063     | chr1  | +        | 159059026 | 159064667                               | GO:000715:GO:001602:GO:000367:hs.403857  | ref:NM_002THC260375  |  |
| 1631.8488  | 161.19093 | 105.1609  | 100.81781 | 182.6077  | KIAA0748  | HSPC257             | KIAA0748            | 9840  | chr12    | +         | 53629494                                | 5363930                                  |                      |  |
| 4777.2285  | 655.07575 | 671.1056  | 635.61993 | 619.29625 | C7orf7    | TAKIL               | chromosom:6911      | chr21 | +        | 29424676  | 29497499                                |                                          |                      |  |
| 3097.3176  | 397.78345 | 487.1015  | 57.80197  | 591.8749  | CD2345    | colicoid:490799     | chr7                | +     | 59933619 | 59964526  | GO:000551:hs.569713                     | ref:NM_001THC402281                      |                      |  |
| 7126.6793  | 908.711   | 161.42409 | 394.0673  | 220.74294 | UNQ470    | CAA1470             | 375704              | chr7  | +        | 3451104   | 34513027                                |                                          |                      |  |
| 2220.777   | 282.4194  | 356.8302  | 380.3827  | 415.46515 | LY9       | CD229:SLA           | lymphocyte:4063     | chr1  | +        | 15903261  | 159064667                               | GO:000715:GO:001602:GO:000367:hs.403857  | ref:NM_002THC260375  |  |
| 1317.6743  | 160.4559  | 161.3415  | 124.56162 | 133.62349 | AK5       | AK6:MGK3            | adenylate:ki:26289  | chr1  | +        | 77520874  | 77797007                                | GO:000613:GO:000573:GO:000178:hs.559718  | ref:NM_1474THC248432 |  |
| 1156.867   | 107.6372  | 132.66188 | 226.64308 | 156.70981 | YPLM1     | C14orf170:YLP       | motif:c6252         | chr14 | +        | 74299827  | 74372853                                | GO:0008159:GO:000557:GO:000367:hs.531111 | gb:BC0235THC275442   |  |
| 4558.0938  | 283.46298 | 209.41559 | 142.27748 | 386.12207 | TF1PCL1   | CRTR1:LB            | transcription:29842 | chr4  | -        | 121695003 | 121759245                               | GO:000012:GO:000563:GO:000370:hs.156471  | ref:NM_014THC215106  |  |
| 4255.381   | 201.39006 | 151.66537 | 226.64308 | 227.71089 | SCP2      | DKFZ:26868          | steroid:camer6342   | chr1  | +        | 53165555  | 53232492                                | GO:000669:GO:000573:GO:000549:hs.476365  | ref:NM_002THC269388  |  |

(AE-1 vs Con) (AE-1 vs Stable) (AE-3 vs Con) (AE-3 vs Stable) (AE-10 vs Con) (AE-10 vs Stable) (AE-10 vs 8P) GENE\_N/SYNONY/DESCRIP NCBI\_GE CHROMSTART

| SEQ_ID    | Fold chnq | Log Fold | Absolute FRegulation | Fold chnq | Log Fold | Absolute FRegulation | Fold chnq | Log Fold | Absolute FRegulation | Fold chnq | Log Fold | Absolute FRegulation | Fold chnq | Log Fold | Absolute FRegulation | Fold chnq | Log Fold | Absolute FRegulation | Fold chnq | Log Fold | Absolute FRegulation | Con PBM  | Stable PBM | AE-1 PBM | AE-3 PBM  | AE-10 8P PBM | GENE_N/SYNONY/DESCRIP | NCBI_GE  | CHROMSTART |        |           |                  |                |          |          |
|-----------|-----------|----------|----------------------|-----------|----------|----------------------|-----------|----------|----------------------|-----------|----------|----------------------|-----------|----------|----------------------|-----------|----------|----------------------|-----------|----------|----------------------|----------|------------|----------|-----------|--------------|-----------------------|----------|------------|--------|-----------|------------------|----------------|----------|----------|
| AB191261  | 12.0543   | 3.591476 | 12.0543              | up        | 6.931292 | 2.793124             | 6.931292  | up       | 11.74042             | 3.553412  | 11.74042 | up                   | 6.758088  | 2.75506  | 6.758088             | up        | 10.1716  | 3.364475             | 10.1716   | up       | 5.84873              | 2.548123 | 5.84873    | up       | 253.8776  | 441.5218     | 3060.316              | 2980.629 | 2582.342   | FN1    | CIG/DKZF2 | fibronectin:2335 | chr2           | 2.16E+08 |          |
| AX7289814 | 12.64951  | 3.66101  | 12.64951             | up        | 12.97689 | 3.697873             | 12.97689  | up       | 20.04907             | 4.325643  | 20.04907 | up                   | 20.56796  | 3.462327 | 20.56796             | up        | 9.831717 | 3.297443             | 9.831717  | up       | 10.08617             | 3.334307 | 10.08617   | up       | 550.0894  | 536.2117     | 6958.362              | 11028.78 | 5408.323   | ALPL   | AP-TNAP1  | alkaline ph:249  | chr7           | 21708465 |          |
| BC004940  | 19.274201 | 4.777788 | 19.274201            | up        | 28.56771 | 4.836313             | 28.56771  | up       | 33.53661             | 5.067665  | 33.53661 | up                   | 34.92505  | 3.12619  | 34.92505             | up        | 13.19787 | 3.722233             | 13.19787  | up       | 13.74427             | 3.780758 | 13.74427   | up       | 709.8009  | 681.583      | 19471.26              | 23804.32 | 9367.857   | CEAC   | c-fos     | v-fos            | FBJ:1253       | chr14    | 74815312 |
| BC005008  | 19.12746  | 4.257573 | 19.12746             | up        | 12.47856 | 3.874391             | 12.47856  | up       | 12.47856             | 3.874391  | 12.47856 | up                   | 5.678633  | 3.258197 | 5.678633             | up        | 8.446976 | 2.695252             | 8.446976  | up       | 6.746761             | 2.695252 | 6.746761   | up       | 40.1248   | 62.1863      | 9183.566              | 591.265  | 4055.603   | CEACAM | CD66c     | CEACAM:66c       | carcinoem:4680 | chr19    | 44951346 |
| BC005322  | 8.366265  | 3.064584 | 8.366265             | up        | 21.15465 | 4.402903             | 21.15465  | up       | 9.203319             | 3.202154  | 9.203319 | up                   | 23.2712   | 4.540474 | 23.2712              | up        | 10.46855 | 3.879899             | 10.46855  | up       | 26.47041             | 4.726308 | 26.47041   | up       | 495.6132  | 196.0128     | 4146.582              | 4561.452 | 5188.537   | DCN    | DSPG2PG   | decorin:1634     | chr12          | 90063644 |          |
| BC007628  | 29.69084  | 4.891946 | 29.69084             | up        | 8.770476 | 3.132655             | 8.770476  | up       | 34.44355             | 5.106162  | 34.44355 | up                   | 10.1744   | 3.346871 | 10.1744              | up        | 6.13455  | 3.575306             | 6.13455   | up       | 10.6739              | 3.416106 | 10.6739    | up       | 116.26119 | 134.5263     | 3423.449              | 3971.412 | 4166.428   | KRT19  | CK19      | K19              | keratin:19     | chr17    | 36933395 |
| BC007695  | 7.101755  | 2.828176 | 7.101755             | up        | 7.540242 | 2.821112             | 7.540242  | up       | 9.336472             | 3.222878  | 9.336472 | up                   | 7.54653   | 2.915813 | 7.54653              | up        | 6.785271 | 2.762406             | 6.785271  | up       | 5.844432             | 2.455    |            |          |           |              |                       |          |            |        |           |                  |                |          |          |

|          |          |          |          |      |          |          |          |      |          |          |           |      |          |          |          |      |          |          |          |      |          |          |          |      |          |          |          |          |          |           |                |            |            |        |          |            |
|----------|----------|----------|----------|------|----------|----------|----------|------|----------|----------|-----------|------|----------|----------|----------|------|----------|----------|----------|------|----------|----------|----------|------|----------|----------|----------|----------|----------|-----------|----------------|------------|------------|--------|----------|------------|
| BC004490 | 27.43201 | 4.777788 | 27.43201 | up   | 28.56771 | 4.836313 | 28.56771 | up   | 33.53661 | 5.067665 | 33.53661  | up   | 34.92505 | 5.12619  | 34.92505 | up   | 13.19787 | 3.722233 | 13.19787 | up   | 13.74427 | 3.780758 | 13.74427 | up   | 709.8009 | 681.583  | 19471.26 | 23804.32 | 9367.857 | FOS       | c-fos          | v-fos      | FBI        | r2353  | chr14    | 74815312   |
| AB042648 | -2.27021 | -1.18283 | 2.270213 | down | -3.40858 | -1.76917 | 3.408584 | down | -2.13113 | -1.09162 | 2.131131  | down | -1.19976 | -1.67796 | 3.199761 | down | -2.08251 | -1.05832 | 2.082505 | down | -1.12675 | -1.64466 | 3.126752 | down | 611.453  | 918.0587 | 269.3372 | 286.9147 | 293.6142 | MYO1B     | DKFZP434myosin | XV         | 84700      | chr22  | 24495993 |            |
| AF072385 | -4.30153 | -2.10485 | 4.30153  | down | -2.41748 | -1.2735  | 2.417481 | down | -3.67128 | -1.87628 | 3.671276  | down | -2.06328 | -1.04494 | 2.063275 | down | -3.64245 | -1.86491 | 3.642451 | down | -2.04708 | -1.03356 | 2.047075 | down | 515.1675 | 289.5266 | 119.7638 | 140.3238 | 141.4343 | KIR2DL8   | HDMCPH         | chromosome | 283600     | chr14  | 99859431 |            |
| AF002258 | -2.12843 | -1.17848 | 2.263388 | down | -2.09308 | -1.06563 | 2.09308  | down | -2.60304 | -1.3802  | 2.603044  | down | -2.53811 | -1.34375 | 2.53811  | down | -2.90006 | -1.56008 | 2.900099 | down | -2.82772 | -1.49366 | 2.827717 | down | 1617.851 | 1577.944 | 760.1166 | 621.523  | 557.8685 | KIR4DL4   | 103A51         | killer     | cell       | r3805  | chr10    | 60090922   |
| AF074087 | -3.0983  | -1.63147 | 3.098295 | down | -2.48749 | -1.31469 | 2.487485 | down | -4.79671 | -2.26205 | 4.796712  | down | -3.85107 | -1.94526 | 3.851069 | down | -2.64845 | -1.40515 | 2.648447 | down | -2.12632 | -1.08836 | 2.126322 | down | 1678.65  | 1347.715 | 541.7982 | 349.9586 | 633.8245 | KIR2DS2   | 183ACT1        | killer     | cell       | r3807  | chr19    | rand721465 |
| AF929086 | -2.26339 | -1.17848 | 2.263388 | down | -2.09308 | -1.06563 | 2.09308  | down | -5.05448 | -2.33756 | 5.05448   | down | -4.67416 | -2.22471 | 4.674155 | down | -3.32307 | -1.73252 | 3.323071 | down | -3.07303 | -1.61966 | 3.073027 | down | 2701.184 | 1915.338 | 915.0813 | 409.772  | 623.2741 | SLA2      | C20orf156      | Src-like   | ad         | 84174  | chr20    | 34675682   |
| AF924278 | -3.45213 | -1.78429 | 3.452131 | down | -6.52236 | -2.70539 | 6.522363 | down | -2.85623 | -1.51411 | 2.856232  | down | -5.39649 | -2.43202 | 5.396487 | down | -2.09048 | -1.06384 | 2.090481 | down | -3.9497  | -1.98174 | 3.949699 | down | 560.9077 | 1059.764 | 162.4816 | 196.3803 | 268.3511 | PRDM16    | KIAA1675       | Prc domain | 63976      | chr1   | 2975620  |            |
| AF320053 | -2.28872 | -1.19454 | 2.28872  | down | -2.14865 | -1.10343 | 2.148653 | down | -2.64802 | -1.40491 | 2.648016  | down | -2.48596 | -1.3138  | 2.485965 | down | -3.18266 | -1.67023 | 3.182663 | down | -2.98788 | -1.57912 | 2.987882 | down | 62.50703 | 402.3416 | 187.253  | 161.8458 | 134.6578 | MYCN      | MODED1         | Nr-myc     | myc        | 4613   | chr2     | 15998136   |
| AF367023 | -3.72848 | -1.89859 | 3.728477 | down | -2.44498 | -1.23982 | 2.444979 | down | -3.13334 | -1.63846 | 3.133336  | down | -2.0416  | -1.0297  | 2.041596 | down | -3.06304 | -1.61496 | 3.063039 | down | -2.00861 | -1.0062  | 2.008613 | down | 379.2629 | 248.484  | 101.6305 | 121.7019 | 123.7095 | KCNIP3    | CSEEN1         | Kv channel | 30818      | chr2   | 95329136 |            |
| AF646521 | -3.21799 | -1.21287 | 2.317984 | down | -3.33105 | -1.73598 | 3.331046 | down | -2.35737 | -1.23497 | 2.357366  | down | -3.38246 | -1.75807 | 3.382464 | down | -2.1042  | -1.14432 | 2.104149 | down | -2.11767 | -1.06742 | 2.117667 | down | 1668.677 | 2397.961 | 719.8823 | 708.399  | 754.9144 | FAM71B    | MGC269R6       | family     | 153745     | chr5   | 1.57E+08 |            |
| AJ002102 | -3.71957 | -1.89513 | 3.719565 | down | -3.82965 | -1.93721 | 3.829654 | down | -7.40683 | -2.88886 | 7.406831  | down | -7.62605 | -2.93094 | 7.626052 | down | -4.23646 | -2.08286 | 4.236462 | down | -4.36185 | -2.12494 | 4.361849 | down | 1355.273 | 1395.385 | 364.3632 | 182.9761 | 319.9067 | KIR2DS2   | 183ACT1        | killer     | cell       | r3807  | chr19    | rand164628 |
| AJ002104 | -3.71957 | -1.89513 | 3.719565 | down | -3.82965 | -1.93721 | 3.829654 | down | -7.40683 | -2.88886 | 7.406831  | down | -7.62605 | -2.93094 | 7.626052 | down | -4.23646 | -2.08286 | 4.236462 | down | -4.36185 | -2.12494 | 4.361849 | down | 831.2791 | 797.4266 | 358.8875 | 223.046  | 310.4958 | KIR2DS2   | 183ACT1        | killer     | cell       | r3807  | chr19    | rand164628 |
| AJ421515 | -25.3616 | -4.66457 | 25.3616  | up   | -4.54459 | -1.88443 | 4.544589 | down | -12.4696 | -3.64034 | 12.469578 | down | -2.23445 | -1.15992 | 2.234446 | down | -11.9072 | -3.57377 | 11.90723 | down | -2.13368 | -1.09304 | 2.133677 | down | 513.8294 | 956.7823 | 210.5322 | 428.1968 | 448.4195 | TRTAC1    | ASPIC1         | Cartilage  | a          | 55118  | chr10    | 90629401   |
| AK000262 | -3.12871 | -1.64557 | 3.12871  | down | -3.00774 | -1.58845 | 3.007741 | down | -3.29717 | -1.72123 | 3.297171  | down | -3.16969 | -1.66434 | 3.169688 | down | -2.291   | -1.19598 | 2.290998 | down | -2.20242 | -1.13939 | 2.202419 | down | 95.52938 | 915.0281 | 304.2244 | 288.6808 | 415.4652 | MTM1      | OM14FLJ00001   | transmem   | protein    | 113178 | chr19    | 21954521   |
| AK026367 | -3.14972 | -1.65522 | 3.149716 | down | -2.61595 | -1.40705 | 2.615945 | down | -2.91653 | -1.54426 | 2.916535  | down | -2.45562 | -1.29608 | 2.455615 | down | -3.44457 | -1.78432 | 3.444567 | down | -2.9002  | -1.5365  | 2.900199 | down | 541.7061 | 456.9662 | 171.9857 | 185.7362 | 157.2639 | N/A       | N/A            | Homo sapi  | N/A        | chrY   | Y        |            |
| AK074586 | -2.73972 | -1.45403 | 2.739719 | down | -2.30367 | -1.20393 | 2.303668 | down | -2.75698 | -1.46309 | 2.75698   | down | -2.31818 | -1.12129 | 2.318182 | down | -2.6511  | -1.40659 | 2.651104 | down | -2.22916 | -1.1565  | 2.229157 | down | 520.1008 | 774.4226 | 336.1694 | 334.0647 | 347.4061 | SCAMP4    | FLJ33847       | secretory  | protein    | 113178 | chr19    | 11856570   |
| AK091878 | -6.26776 | -2.64795 | 6.267757 | down | -2.13082 | -1.09141 | 2.130824 | down | -7.1578  | -2.83952 | 7.157802  | down | -2.43341 | -1.28298 | 2.433409 | down | -10.5356 | -3.39721 | 10.53564 | down | -3.58176 | -1.84067 | 3.581759 | down | 1612.649 | 548.246  | 257.2929 | 225.2995 | 153.0661 | LOC123874 | 923A4          | 1,11       | hypothetic | 123876 | chr16    | 20394189   |
| AK097866 | -2.4492  | -1.29231 | 2.449197 | down | -2.57334 | -1.36364 | 2.573343 | down | -3.10072 | -1.63562 | 3.100722  | down | -3.88757 | -2.03413 | 3.887572 | down | -4.30377 | -2.10547 | 4.303774 | down | -4.30377 | -2.10547 | 4.303774 | down | 743.3167 | 584.3455 | 230.2041 | 239.2231 | 149.8188 | N/A       | N/A            | Homo sapi  | N/A        | chr1   | 54381652 |            |
| AK122760 | -3.22895 | -1.69106 | 3.228946 | down | -2.53838 | -1.34391 | 2.53838  | down | -3.10721 | -1.63562 | 3.107212  | down | -2.44268 | -1.28847 | 2.44268  | down | -4.96144 | -2.31076 | 4.961437 | down | -3.90035 | -1.9636  | 3.900347 | down | 743.3167 | 584.3455 | 230.2041 | 239.2231 | 149.8188 | N/A       | N/A            | Homo sapi  | N/A        | chr1   | 54381652 |            |
| AK124690 | -2.04036 | -1.02883 | 2.040363 | down | -2.66624 | -1.41481 | 2.666245 | down | -3.10721 | -1.63562 | 3.107212  | down | -2.71898 | -1.44307 | 2.718984 | down | -2.31326 | -1.20993 | 2.313263 | down | -3.02285 | -1.59591 | 3.022851 | down | 59.7703  | 490.0353 | 199.5328 | 143.4259 | 155.4441 | N/A       | N/A            | Homo sapi  | N/A        | chr3   | 1.36E+08 |            |
| AK126846 | -2.90564 | -1.52886 | 2.905638 | down | -2.45591 | -1.29626 | 2.455913 | down | -4.0423  | -2.01518 | 4.042298  | down | -3.41664 | -1.77258 | 3.416645 | down | -3.72977 | -1.89909 | 3.729767 | down | -3.15249 | -1.65649 | 3.152486 | down | 45.81539 | 5394.662 | 2069.694 | 1944.429 | 1984.604 | N/A       | N/A            | Homo sapi  | N/A        | chr7   | 77555509 |            |
| AK126997 | -2.18319 | -1.12644 | 2.183192 | down | -2.0665  | -1.38212 | 2.066503 | down | -2.32384 | -1.21651 | 2.323839  | down | -2.77442 | -1.47219 | 2.77442  | down | -2.2768  | -1.18701 | 2.276976 | down | -2.71826 | -1.44268 | 2.718256 | down | 62.86251 | 466.0561 | 198.7176 | 178.1543 | 209.6147 | N/A       | N/A            | Homo sapi  | N/A        | chr9   | 87325324 |            |
| AK127390 | -2.43517 | -1.28402 | 2.43517  | down | -2.34532 | -1.22978 | 2.345319 | down | -2.71625 | -1.44162 | 2.716248  | down | -2.61603 | -1.38738 | 2.616026 | down | -2.30857 | -1.207   | 2.308574 | down | -2.22339 | -1.15276 | 2.223394 | down | 346.5911 | 496.7902 | 119.8809 | 160.8999 | 164.6979 | N/A       | N/A            | Homo sapi  | N/A        | chr3   | 52071149 |            |
| AK127904 | -3.02511 | -1.59699 | 3.025108 | down | -4.58614 | -2.19728 | 4.586139 | down | -2.2529  | -1.17422 | 2.252902  | down | -3.41697 | -1.77272 | 3.416971 | down | -2.20193 | -1.13877 | 2.201926 | down | -3.33817 | -1.73906 | 3.338174 | down | 682.9326 | 957.2303 | 215.3326 | 237.4556 | 162.2483 | N/A       | N/A            | Homo sapi  | N/A        | chr12  | 64353993 |            |
| AK128072 | -2.20923 | -1.14355 | 2.209235 | down | -2.68065 | -1.42258 | 2.680645 | down | -2.00341 | -1.00246 | 2.003407  | down | -2.44309 | -1.28149 | 2.443098 | down | -2.93205 | -1.55191 | 2.932051 | down | -3.5577  | -1.83094 | 3.557697 | down | 10.7492  | 57.2303  | 215.3326 | 237.4556 | 162.2483 | N/A       | N/A            | Homo sapi  | N/A        | chr12  | 64353993 |            |
| AK130913 | -2.97954 | -1.57509 | 2.979536 | down | -2.49586 | -1.31953 | 2.495855 | down | -2.98149 | -1.54432 | 2.981468  | down | -2.44149 | -1.28776 | 2.441493 | down | -3.38279 | -1.72834 | 3.382789 | down | -2.83365 | -1.52066 | 2.833647 | down | 47.50081 | 879.0302 | 352.196  | 360.038  | 310.2117 | N/A       | N/A            | Homo sapi  | N/A        | chr8   | 1.46E+08 |            |
| AK131481 | -2.64532 | -1.40344 | 2.645323 | down | -3.95819 | -1.98484 | 3.958193 | down | -3.18947 | -1.67332 | 3.189472  | down | -4.7724  | -2.25472 | 4.772401 | down | -3.68313 | -1.88093 | 3.68313  | down | -5.51106 | -2.46233 | 5.511063 | down | 564.1364 | 844.1165 | 213.2581 | 178.6746 | 153.1677 | G3orf2    | DKFZP43        | chromosome | 84077      | chr3   | 14691651 |            |
| AK172756 | -2.01668 | -1.01198 | 2.016682 | down | -2.04966 | -1.03538 | 2.04966  | down | -2.32616 | -1.21795 | 2.326163  | down | -2.3642  | -1.24135 | 2.364202 | down | -3.4448  | -1.78442 | 3.444803 | down | -3.50113 | -1.80782 | 3.501132 | down | 442.1628 | 449.3925 | 219.2527 | 190.0825 | 128.3566 | GLDN      | COMO           | CO         | glomiosin  | 342035 | chr5     | 49421168   |
| AY758752 | -2.39774 | -1.26167 | 2.397736 | down | -2.60005 | -1.37854 | 2.600055 | down | -2.23401 | -1.15964 | 2.234014  | down | -2.42822 | -1.27651 | 2.428218 | down | -2.11244 | -1.09489 | 2.112435 | down | -2.29608 | -1       |          |      |          |          |          |          |          |           |                |            |            |        |          |            |





|                  |          |          |      |          |          |          |      |          |          |          |      |          |          |          |      |          |          |          |      |          |           |          |          |          |           |                               |                   |           |          |
|------------------|----------|----------|------|----------|----------|----------|------|----------|----------|----------|------|----------|----------|----------|------|----------|----------|----------|------|----------|-----------|----------|----------|----------|-----------|-------------------------------|-------------------|-----------|----------|
| NM_0154-2.12958  | -1.09057 | 2.129575 | down | -2.147   | -1.10233 | 2.147005 | down | -2.26518 | -1.19139 | 2.283719 | down | -2.28372 | -1.25619 | 2.381205 | down | -2.40069 | -1.26345 | 2.400694 | down | 502.684  | 506.7982  | 236.0489 | 221.9179 | 211.1049 | CC2orf28  | DKFZFP343:chromosom 25876     | chr20             | 3760150   |          |
| NM_01554-2.34156 | -1.42247 | 2.341562 | down | -2.38093 | -1.25153 | 2.380933 | down | -3.07195 | -1.61916 | 3.071951 | down | -3.1236  | -1.64321 | 3.123603 | down | -2.84638 | -1.50913 | 2.846379 | down | 639.736  | 650.5204  | 273.2208 | 208.2596 | 224.764  | AC00711   | BTBT/IFTT acyl-CoA 126027     | chr1              | 54766488  |          |
| NM_01673-2.9655  | -1.56828 | 2.965502 | down | -2.01628 | -1.10117 | 2.016284 | down | -4.02826 | -2.01016 | 4.028264 | down | -2.73887 | -1.45388 | 2.738869 | down | -3.407   | -1.7685  | 3.407    | down | 110.0273 | 642.7051  | 169.9687 | 125.1265 | 147.9432 | PAC5      | BSAP paired box 5079          | chr9              | 36828350  |          |
| NM_01855-4.44697 | -2.15282 | 4.446972 | down | -2.53747 | -1.34339 | 2.537471 | down | -6.99485 | -2.80629 | 6.994845 | down | -3.9913  | -1.74568 | 3.991304 | down | -4.32221 | -2.11147 | 4.322209 | down | 504.6475 | 365.9302  | 262.4421 | 166.8476 | 270.0177 | SLC16A10  | PROOR0813 solute carri 117427 | chr6              | 1.12E+08  |          |
| NM_02190-2.42952 | -1.28067 | 2.42952  | down | -2.40832 | -1.26802 | 2.408316 | down | -2.98226 | -1.57675 | 2.982965 | down | -2.95693 | -1.5641  | 2.956933 | down | -2.2139  | -1.14659 | 2.213903 | down | 1060.362 | 1051.2207 | 436.4987 | 355.5128 | 479.0102 | SDMK2     | FLJ10832 sidekick h. 54549    | chr17             | 68845460  |          |
| NM_02192-2.27426 | -1.1854  | 2.274264 | down | -2.42557 | -1.27832 | 2.425569 | down | -2.15622 | -1.1085  | 2.15622  | down | -2.29967 | -1.20143 | 2.299671 | down | -2.1937  | -1.11679 | 2.19371  | down | 226.126  | 241.1806  | 994.3258 | 1048.761 | 1028.185 | HAMP      | HEPC/HFE hepcidin ai 57817    | chr19             | 408465249 |          |
| NM_02202-2.42164 | -1.27598 | 2.421637 | down | -2.32235 | -1.21558 | 2.322347 | down | -2.3355  | -1.22373 | 2.335499 | down | -2.23974 | -1.16333 | 2.239741 | down | -2.71867 | -1.4429  | 2.718671 | down | 462.8627 | 827.4935  | 356.3177 | 369.4594 | 317.3875 | PADP2A    | PAP-2 pappalysin 60676        | chr19             | 1.75E+08  |          |
| NM_03095-2.21941 | -1.15018 | 2.219414 | down | -2.63131 | -1.39578 | 2.631311 | down | -3.35448 | -1.74609 | 3.354475 | down | -3.97703 | -1.99169 | 3.977025 | down | -2.60773 | -1.38279 | 2.607729 | down | 809.3671 | 532.6919  | 202.4436 | 133.9423 | 172.2979 | ADAMTS    | ADAM-TS ADAM h. 81794         | chr19             | 8.55E+15  |          |
| NM_03391-4.83029 | -2.07211 | 4.830294 | down | -4.98916 | -2.3188  | 4.989164 | down | -9.83225 | -3.29754 | 9.832348 | down | -10.1557 | -3.34422 | 10.15574 | down | -3.02997 | -1.5993  | 3.02997  | down | 5363.468 | 4559.874  | 1110.381 | 545.4921 | 1770.139 | KSP37     | Ksp37-pro 83888               | chr4              | 15570963  |          |
| NM_03292-2.10301 | -1.27245 | 2.103008 | down | -2.4922  | -1.31742 | 2.492202 | down | -2.9012  | -1.53665 | 2.901204 | down | -3.43812 | -1.78162 | 3.438116 | down | -2.7835  | -1.4769  | 2.783502 | down | 2996.053 | 3550.518  | 1424.651 | 1032.693 | 1076.361 | SLA2      | CC2orf156 Src-like-adt 84174  | chr20             | 34674335  |          |
| NM_03312-2.25738 | -1.17465 | 2.257376 | down | -2.07746 | -1.05482 | 2.077456 | down | -2.68768 | -1.42636 | 2.687683 | down | -2.47347 | -1.30653 | 2.473467 | down | -3.17952 | -1.66881 | 3.179518 | down | 737.7606 | 678.9591  | 326.8223 | 274.4969 | 232.0354 | SCRT2     | scrat h. 85508                | chr20             | 590239    |          |
| NM_05328-2.30053 | -1.7227  | 3.300533 | down | -2.90813 | -1.32661 | 2.908126 | down | -2.96184 | -1.56649 | 2.961838 | down | -2.25075 | -1.1704  | 2.250746 | down | -2.99302 | -1.5816  | 2.993017 | down | 22.7744  | 492.6343  | 196.4153 | 218.876  | 216.596  | ODF3      | CK6C CK6C keratin C. 140446   | chr11             | 186760    |          |
| NM_05824-2.17617 | -1.12179 | 2.176165 | down | -2.82097 | -1.49619 | 2.820969 | down | -2.73761 | -1.45292 | 2.737611 | down | -2.61498 | -1.3368  | 2.614978 | down | -2.61498 | -1.3368  | 2.614978 | down | 2573.205 | 3335.651  | 1182.448 | 939.945  | 984.0247 | KRT6C     | CK6C CK6C keratin C. 140446   | chr11             | 51167243  |          |
| NM_13345-2.15468 | -1.10747 | 2.15468  | down | -2.19835 | -1.13642 | 2.198352 | down | -2.30775 | -1.20262 | 2.307745 | down | -2.35452 | -1.23543 | 2.354519 | down | -2.52268 | -1.33496 | 2.522683 | down | 257.346  | 2405.126  | 1094.059 | 1021.493 | 934.4597 | KRMI2     | EM15 EM15 keratin 129800      | chr22             | 27931952  |          |
| NM_13841-2.71525 | -1.44109 | 2.715251 | down | -3.00317 | -1.58648 | 3.003167 | down | -3.78884 | -1.92175 | 3.788835 | down | -4.19059 | -2.06715 | 4.19059  | down | -2.17034 | -1.11792 | 2.17034  | down | 786.2566 | 869.6285  | 289.5705 | 207.5194 | 362.2735 | CTUBH5    | FLJ3472 chromosom 112817      | chr10             | 99334107  |          |
| NM_13916-2.07113 | -1.05042 | 2.07113  | down | -2.34791 | -1.23138 | 2.347909 | down | -3.34032 | -1.73999 | 3.340319 | down | -2.43279 | -1.92094 | 3.786709 | down | -2.43279 | -1.92094 | 3.786709 | down | 634.874  | 719.7167  | 306.5352 | 190.0639 | 260.9649 | KRIB1     | PUSA                          | Trub p5ub 142940  | chr10     | 1.17E+08 |
| NM_14715-2.61011 | -1.38411 | 2.610116 | down | -2.43978 | -1.28075 | 2.439776 | down | -3.58502 | -1.84198 | 3.585018 | down | -3.35107 | -1.74462 | 3.351068 | down | -2.62155 | -1.39042 | 2.62155  | down | 785.127  | 733.8913  | 300.8027 | 219.0022 | 299.4896 | TMIE      | DNB6 transmem 259236          | chr3              | 4671826   |          |
| NM_14896-2.62856 | -2.64813 | 6.268561 | down | -3.40161 | -1.76622 | 3.401611 | down | -3.95929 | -1.98524 | 3.959291 | down | -2.14849 | -1.1033  | 1.48494  | down | -3.99133 | -1.99687 | 3.991329 | down | 2895.161 | 1571.048  | 461.8542 | 731.2322 | 725.3627 | NLRF2A2   | APP-3 DDB tumor necr 8718     | chr1              | 6443797   |          |
| NM_15327-2.40262 | -1.25461 | 2.402623 | down | -3.09286 | -1.62894 | 3.092862 | down | -2.1432  | -1.09977 | 2.143202 | down | -2.75891 | -1.4641  | 2.758913 | down | -2.47129 | -1.30526 | 2.47129  | down | 42.4713  | 543.8413  | 175.8376 | 172.1216 | 107.1717 | KRHS2     | FLJ38753 kelch dom 127707     | chr1              | 18680452  |          |
| NM_15327-3.18917 | -1.67318 | 3.189173 | down | -2.79522 | -1.48296 | 2.795216 | down | -2.37894 | -1.25032 | 2.378936 | down | -2.08507 | -1.06009 | 2.085067 | down | -2.37364 | -1.45293 | 2.373643 | down | 1504.348 | 1318.517  | 471.7048 | 332.3181 | 549.505  | RP11-450F | MGC1256 thymosin 257240       | chrX              | 21583529  |          |
| NM_15372-4.8727  | -2.16584 | 4.87271  | down | -3.04427 | -1.6061  | 3.044268 | down | -3.23554 | -1.69401 | 3.235539 | down | -2.19506 | -1.13426 | 2.195064 | down | -3.49436 | -1.80503 | 3.494364 | down | 1596.226 | 1082.917  | 355.7232 | 493.3417 | 456.8003 | VM142     | MGC1266 vitellin form 26675   | chr1              | 45021845  |          |
| NM_15366-2.08346 | -1.05898 | 2.083458 | down | -2.22303 | -1.15253 | 2.223026 | down | -2.03279 | -1.18261 | 2.032785 | down | -2.59575 | -1.37615 | 2.595755 | down | -2.23732 | -1.16177 | 2.237322 | down | 791.2333 | 844.237   | 379.7693 | 325.2376 | 353.652  | MYOC      | MYOC myocardin 93649          | chr17             | 12510230  |          |
| NM_15376-2.00747 | -1.05308 | 2.007469 | down | -3.40221 | -1.76647 | 3.402209 | down | -4.02574 | -1.02555 | 2.057376 | down | -3.45012 | -1.07624 | 3.450115 | down | -3.5735  | -1.83734 | 3.573499 | down | 300.588  | 509.877   | 149.8696 | 147.7886 | 142.6858 | RTYD      | MGC354 receptor trk 13212     | chr3              | 1.88E+08  |          |
| NM_17208-2.43712 | -1.28517 | 2.437116 | down | -2.31076 | -1.20837 | 2.310762 | down | -2.19132 | -1.1318  | 2.191318 | down | -2.07771 | -1.05499 | 2.07708  | down | -2.88747 | -1.52981 | 2.88747  | down | 620.2306 | 588.0744  | 254.4937 | 283.04   | 214.8007 | CAMK2B    | CAM2C calcium mol 916         | chr7              | 44225415  |          |
| NM_17211-12.7067 | -3.66752 | 12.70671 | down | -4.64383 | -2.21532 | 4.643832 | down | -23.4509 | -4.55157 | 23.45086 | down | -8.57042 | -3.09937 | 8.570421 | down | -7.07824 | -3.28339 | 7.078241 | down | 3610.962 | 1319.673  | 284.1776 | 153.98   | 510.1497 | CSDB      | CDB2 CDB8 mol 926             | chr2              | 86959970  |          |
| NM_17211-16.7673 | -4.06758 | 16.76727 | down | -6.36995 | -2.67128 | 6.369953 | down | -13.0408 | -3.70496 | 13.04076 | down | -4.95424 | -2.30866 | 4.954239 | down | -6.7835  | -2.76203 | 6.783504 | down | 4202.895 | 1596.697  | 250.6607 | 322.2891 | 619.5758 | CSDB      | CDB18 CDB8 mol 926            | chr2              | 86960022  |          |
| NM_17368-9.51829 | -3.2507  | 9.518293 | down | -2.53221 | -1.34057 | 2.532508 | down | -12.5777 | -3.6528  | 12.5777  | down | -3.34653 | -1.74267 | 3.346531 | down | -7.84843 | -3.12902 | 8.478432 | down | 1376.339 | 366.2007  | 144.6001 | 109.427  | 157.3241 | OTOP2     | otopetropin 2 92736           | chr7              | 1.5E+08   |          |
| NM_17375-3.13878 | -1.6502  | 3.138778 | down | -3.10573 | -1.63493 | 3.105726 | down | -2.05662 | -1.04027 | 2.056618 | down | -2.03496 | -1.025   | 2.034962 | down | -2.40295 | -1.2648  | 2.402946 | down | 782.9844 | 774.6509  | 249.4267 | 380.6711 | 325.8063 | VSIG9     | DKFZFP57-V set and 2101633    | chr3              | 1.15E+08  |          |
| NM_17816-2.36658 | -1.42481 | 2.366584 | down | -2.30336 | -1.20374 | 2.303355 | down | -2.11103 | -1.07975 | 2.111033 | down | -2.05463 | -1.03888 | 2.054632 | down | -2.68468 | -1.42475 | 2.68468  | down | 2.417234 | 417.3167  | 181.1778 | 203.102  | 159.1708 | OTOP2     | otopetropin 2 92736           | chr7              | 70431964  |          |
| NM_18251-2.78381 | -1.47706 | 2.783808 | down | -2.25768 | -1.17484 | 2.257684 | down | -2.66139 | -1.44218 | 2.661394 | down | -2.15841 | -1.10997 | 2.158405 | down | -4.1911  | -2.06733 | 4.1911   | down | 567.3245 | 640.1032  | 203.7944 | 213.1681 | 135.3641 | FLJ32252  | -                             | hypothetic 146336 | chr16     | 1054093  |
| NM_18262-2.56659 | -1.35985 | 2.566598 | down | -2.01712 | -1.0123  | 2.01712  | down | -3.56531 | -1.8088  | 3.565309 | down | -2.75346 | -1.46125 | 2.75346  | down | -2.76188 | -1.46565 | 2.761878 | down | 125.4665 | 989.942   | 490.7702 | 359.5267 | 456.0683 | MGC5249   | PRO171                        | hypothetic 348378 | chr1      | 52871653 |
| NM_18262-4.27224 | -1.30582 | 4.272243 | down | -2.63948 | -1.40025 | 2.639476 | down | -2.26578 | -1.18001 | 2.265778 | down | -2.41905 | -1.27444 | 2.419047 | down | -2.56969 | -1.3616  | 2.569691 | down | 534.835  | 571.0135  | 216.336  | 236.0489 | 208.132  | SLC6A18   | FLJ12032 solute carri 348932  | chr5              | 1278469   |          |
| NM_1944-2.90679  | -1.53943 | 2.906791 | down | -4.14164 | -2.0502  | 4.141639 | down | -3.83712 | -1.94002 | 3.837116 | down | -5.46718 | -2.4508  | 5.467181 | down | -3.68949 | -1.88342 | 3.689486 | down | 52.5684  | 682.0287  | 164.676  | 124.7496 | 129.7413 | LOC28549  | MGC1266 vitellin form 26675   | chr4              | 10525286  |          |
| NM_19807-2.9212  | -1.54656 | 2.921203 | down | -2.28141 | -1.18993 | 2.281415 | down | -2.83104 | -1.50133 | 2.831042 |      |          |          |          |      |          |          |          |      |          |           |          |          |          |           |                               |                   |           |          |

|                  |          |          |          |          |          |          |          |          |          |          |          |          |          |          |          |          |          |          |          |          |          |          |          |          |          |          |          |          |           |                           |                           |          |          |
|------------------|----------|----------|----------|----------|----------|----------|----------|----------|----------|----------|----------|----------|----------|----------|----------|----------|----------|----------|----------|----------|----------|----------|----------|----------|----------|----------|----------|----------|-----------|---------------------------|---------------------------|----------|----------|
| XM_93227-2.1246  | -1.08719 | 2.124599 | down     | -2.28349 | -1.19124 | 2.28349  | down     | -2.23315 | -1.15908 | 2.233152 | down     | -2.40016 | -1.26313 | 2.400161 | down     | -2.07863 | -1.05563 | 2.078631 | down     | -2.23408 | -1.15968 | 2.234084 | down     | 34935.43 | 37548.12 | 16443.31 | 15644    | 16806.95 | LOC64463- | hypothetical:644635       | chr12                     | 54687343 |          |
| XM_93254-3.15358 | -1.65699 | 3.15358  | down     | -2.45269 | -1.29437 | 2.452693 | down     | -2.84256 | -1.50719 | 2.842555 | down     | -2.21079 | -1.14456 | 2.210793 | down     | -2.80899 | -1.49005 | 2.80899  | down     | -2.18469 | -1.12743 | 2.184688 | down     | 439.2017 | 341.5885 | 139.2708 | 154.5095 | 156.3558 | LOC65224- | similar to t653247        | chr12                     | 11435747 |          |
| XM_93255-2.75097 | -1.45994 | 2.750975 | down     | -2.2287  | -1.1562  | 2.2287   | down     | -2.70413 | -1.45493 | 2.704147 | down     | -2.22096 | -1.15119 | 2.220965 | down     | -2.99251 | -1.58136 | 2.992509 | down     | -2.42438 | -1.27762 | 2.424379 | down     | 507.9933 | 411.5503 | 184.6594 | 185.3025 | 169.755  | LOC64497- | hypothetical:644978       | chr16                     | 65471762 |          |
| XM_93255-5.65355 | -2.49916 | 5.65355  | down     | -3.10746 | -1.63574 | 3.107463 | down     | -4.54509 | -2.17021 | 4.545087 | down     | -2.47391 | -1.30679 | 2.473905 | down     | -4.28369 | -2.09886 | 4.283693 | down     | -2.35452 | -1.23544 | 2.354524 | down     | 1530.203 | 841.0731 | 270.6623 | 339.9779 | 357.2157 | LOC64502- | hypothetical:645023       | chr17                     | 1205967  |          |
| XM_93282-2.13332 | -1.0931  | 2.133324 | down     | -2.31412 | -1.21046 | 2.314119 | down     | -2.534   | -1.34141 | 2.533996 | down     | -2.74875 | -1.45877 | 2.748748 | down     | -2.22661 | -1.13485 | 2.226613 | down     | -2.41531 | -1.27221 | 2.415314 | down     | 316.864  | 343.7177 | 148.5307 | 125.0452 | 142.3076 | FBFI      | FBFI-IFL Fas (TNFR 85302) | chr17                     | 71433523 |          |
| XM_93282-2.75469 | -1.46189 | 2.754685 | down     | -3.24688 | -1.69905 | 3.246882 | down     | -2.67509 | -1.41499 | 2.675091 | down     | -3.15307 | -1.65676 | 3.153066 | down     | -2.52221 | -1.15479 | 2.522211 | down     | -2.97287 | -1.57186 | 2.972868 | down     | 1391.962 | 1640.673 | 505.3073 | 520.342  | 551.8821 | LOC64534- | hypothetical:645346       | chr16                     | 69029991 |          |
| XM_93282-2.27668 | -1.18693 | 2.27668  | down     | -2.42878 | -1.28023 | 2.428778 | down     | -2.2188  | -1.14978 | 2.218797 | down     | -2.36703 | -1.24308 | 2.367027 | down     | -2.84234 | -1.50708 | 2.842342 | down     | -3.03223 | -1.60038 | 3.03223  | down     | 334.8268 | 357.1954 | 147.068  | 150.9407 | 117.7996 | LOC64536- | hypothetical:645361       | chr20                     | 56186973 |          |
| XM_93282-3.61272 | -1.85308 | 3.612718 | down     | -2.48047 | -1.31061 | 2.48047  | down     | -4.93013 | -2.30163 | 4.931332 | down     | -3.385   | -1.75916 | 3.384999 | down     | -3.35067 | -1.74748 | 3.350668 | down     | -2.30055 | -1.20198 | 2.300548 | down     | 727.8488 | 499.7366 | 201.4685 | 147.6327 | 217.225  | LOC64541- | hypothetical:645411       | chr18                     | 75651000 |          |
| XM_93293-3.24373 | -1.69766 | 3.243734 | down     | -3.10246 | -1.63341 | 3.102464 | down     | -2.87504 | -1.52528 | 2.875037 | down     | -2.74982 | -1.45934 | 2.749824 | down     | -2.50003 | -1.32194 | 2.500026 | down     | -2.39115 | -1.2577  | 2.391146 | down     | 813.7828 | 778.341  | 250.8784 | 283.0512 | 325.5907 | LOC64557- | hypothetical:645574       | chr22                     | 17923032 |          |
| XM_93293-2.02118 | -1.0152  | 2.021184 | down     | -2.53469 | -1.34181 | 2.534692 | down     | -2.10361 | -1.07027 | 2.10361  | down     | -2.62806 | -1.39948 | 2.638059 | down     | -2.05113 | -1.03642 | 2.05113  | down     | -2.57225 | -1.36303 | 2.572246 | down     | 549.9589 | 689.673  | 272.0934 | 261.432  | 268.1209 | LOC65657- | hypothetical:645654       | chr22                     | 21852407 |          |
| XM_93342-2.46985 | -1.30443 | 2.469853 | down     | -2.88042 | -1.52628 | 2.880424 | down     | -2.24538 | -1.16696 | 2.24538  | down     | -2.61864 | -1.38882 | 2.618637 | down     | -2.03797 | -1.02713 | 2.037967 | down     | -2.37675 | -1.24899 | 2.376745 | down     | 1124.939 | 1311.941 | 455.4678 | 501.0014 | 551.9905 | LOC64613- | hypothetical:646130       | chr11                     | 33806897 |          |
| XM_93342-2.26882 | -1.18194 | 2.26882  | down     | -2.21247 | -1.14566 | 2.212469 | down     | -2.21684 | -1.1485  | 2.216835 | down     | -2.16178 | -1.11222 | 2.161776 | down     | -2.83566 | -1.50369 | 2.835663 | down     | -2.76523 | -1.4674  | 2.765234 | down     | 946.7885 | 923.2731 | 417.3043 | 427.0901 | 333.8861 | LOC64619- | hypothetical:646191       | chr1                      | 22472748 |          |
| XM_93347-3.40279 | -1.76672 | 3.40279  | down     | -2.19126 | -1.13176 | 2.191264 | down     | -4.26643 | -2.09303 | 4.266432 | down     | -2.74742 | -1.45808 | 2.747416 | down     | -3.38177 | -1.75778 | 3.381773 | down     | -2.17773 | -1.12283 | 2.17773  | down     | 774.8968 | 499.0034 | 227.724  | 181.6264 | 269.1392 | LOC64622- | hypothetical:646220       | chr18                     | 13207064 |          |
| XM_93378-2.35757 | -1.23753 | 2.357569 | down     | -2.12754 | -1.08919 | 2.127543 | down     | -2.79193 | -1.48126 | 2.791925 | down     | -2.51952 | -1.33315 | 2.51952  | down     | -2.47984 | -1.31025 | 2.479842 | down     | -2.23789 | -1.16214 | 2.237887 | down     | 900.9075 | 813.0069 | 382.1341 | 322.6832 | 363.2922 | LOC64662- | hypothetical:646632       | chr2                      | 2.22E+08 |          |
| XM_93386-6.48942 | -2.69809 | 6.48942  | down     | -2.45807 | -1.29752 | 2.458066 | down     | -5.92747 | -2.56742 | 5.927473 | down     | -2.24521 | -1.16685 | 2.245211 | down     | -9.19894 | -3.20147 | 9.198939 | down     | -3.48438 | -1.8009  | 3.484379 | down     | 5483.29  | 2076.963 | 844.9583 | 925.0637 | 596.0785 | LOC64666- | hypothetical:646663       | chr2                      | 1.48E+08 |          |
| XM_93406-2.76522 | -1.46729 | 2.765218 | down     | -3.58676 | -1.84268 | 3.586769 | down     | -2.39233 | -1.25842 | 2.392331 | down     | -3.10309 | -1.63731 | 3.103089 | down     | -2.09806 | -1.06905 | 2.098057 | down     | -2.72139 | -1.44434 | 2.721386 | down     | 1973.948 | 2560.404 | 713.8489 | 825.1147 | 940.8457 | LOC64452- | similar to t644529        | chr9                      | 1.27E+08 |          |
| XM_93412-2.36012 | -1.23886 | 2.36012  | down     | -2.01925 | -1.01832 | 2.019253 | down     | -3.01494 | -1.59213 | 3.014938 | down     | -2.57949 | -1.36709 | 2.579492 | down     | -2.38903 | -1.25642 | 2.38903  | down     | -2.04938 | -1.03138 | 2.049384 | down     | 707.6205 | 605.4193 | 299.8234 | 334.7040 | 296.1958 | GLYCAMA7  | glycosylat:644076         | chr12                     | 55288243 |          |
| Y13054           | -2.22808 | -1.1558  | 2.228081 | down     | -2.52031 | -1.3336  | 2.520311 | down     | -3.0233  | -1.59612 | 3.023295 | down     | -3.41982 | -1.77392 | 3.419824 | down     | -3.12407 | -1.64343 | 3.124068 | down     | -3.53381 | -1.82123 | 3.533814 | down     | 681.6298 | 771.0309 | 305.9269 | 225.4592 | 218.1866  | KIR2DL4                   | 103AS15:killer cell t:805 | chr19    | 60006918 |

| SEQ_ID   | Fold chang | Log Fold c | Absolute F | Regulation | Fold chang | Log Fold c | Absolute F | Regulation | Fold chang | Log Fold c | Absolute F | Regulation | Fold chang | Log Fold c | Absolute F | Regulation | Fold chang | Log Fold c | Absolute F | Regulation | Fold chang | Log Fold c | Absolute F | Regulation | Con      | PBM      | SB       | AE-1     | PBM      | AE-10   | 8P                      | GENE              | N/SYNONY | DESCRIP | NCLB     | GE | CHROM | START |
|----------|------------|------------|------------|------------|------------|------------|------------|------------|------------|------------|------------|------------|------------|------------|------------|------------|------------|------------|------------|------------|------------|------------|------------|------------|----------|----------|----------|----------|----------|---------|-------------------------|-------------------|----------|---------|----------|----|-------|-------|
| AJ002102 | -3.71957   | -1.89513   | 3.719565   | down       | -3.82965   | -1.93721   | 3.829654   | down       | -7.40683   | -3.88886   | 7.406831   | down       | -7.62605   | -3.93904   | 7.626052   | down       | -4.23646   | -2.02826   | 4.236462   | down       | -4.36185   | -2.12494   | 4.361849   | down       | 1355.273 | 1395.385 | 364.3632 | 182.9761 | 319.9067 | KIR2DS3 | 183ACT1                 | killer cell c:807 | chr19    | rand    | 164628   |    |       |       |
| BC022407 | -3.00703   | -1.58834   | 3.007033   | down       | -3.66055   | -1.87206   | 3.660546   | down       | -4.83658   | -2.37399   | 4.836576   | down       | -5.8877    | -2.5577    | 5.887699   | down       | -3.11696   | -1.64014   | 3.116962   | down       | -3.79437   | -1.92386   | 3.794365   | down       | 1477.991 | 1799.163 | 491.5013 | 305.58   | 474.1671 | SH2D1B  | EAT2                    | SH2 domain        | 117157   | chr1    | 1.61E+08 |    |       |       |
| BC066595 | -3.57574   | -1.83824   | 3.575743   | down       | -3.21577   | -1.68517   | 3.215773   | down       | -9.9349    | -3.3125    | 9.934986   | down       | -8.93475   | -3.15943   | 8.934752   | down       | -3.57512   | -1.83799   | 3.575125   | down       | -3.21522   | -1.68492   | 3.215218   | down       | 1423.849 | 1640.242 | 510.0617 | 183.5801 | 510.1497 | SH2D1B  | EAT2                    | SH2 domain        | 117157   | chr1    | 1.61E+08 |    |       |       |
| BC100911 | -1.12134   | -3.48716   | 1.121345   | down       | -4.39859   | -2.13704   | 4.398593   | down       | -15.6994   | -3.99724   | 15.96944   | down       | -6.26418   | -2.64713   | 6.264182   | down       | -7.89679   | -2.98127   | 7.896788   | down       | -3.0976    | -1.63115   | 3.097599   | down       | 4300.045 | 1686.738 | 383.4722 | 269.2671 | 544.5309 | CD8B    | CD8B IL4 CD8b mole:926  | chr2              | 86896190 |         |          |    |       |       |
| NM_00100 | -3.65066   | -1.87029   | 3.650663   | down       | -3.13065   | -1.64466   | 3.130652   | down       | -4.68644   | -2.22664   | 4.680437   | down       | -4.0781    | -2.00282   | 4.07814    | down       | -3.67105   | -1.87619   | 3.671048   | down       | -3.14348   | -1.65236   | 3.143485   | down       | 4700.465 | 321.7626 | 294.4315 | 229.9133 | 293.2295 | OR2WS1  | olfactory r:41932       | chr1              | 2.46E+08 |         |          |    |       |       |
| NM_00491 | -10.3033   | -3.36503   | 10.30326   | down       | -5.28368   | -2.40154   | 5.283679   | down       | -11.4902   | -3.52233   | 11.49018   | down       | -5.89235   | -2.55884   | 5.892348   | down       | -6.55496   | -2.71259   | 6.554957   | down       | -3.36149   | -1.7499    | 3.361487   | down       | 5385.584 | 2761.814 | 522.7066 | 468.7119 | 821.6047 | CD8B    | CD8B IL4 CD8b mole:926  | chr2              | 86922219 |         |          |    |       |       |
| NM_03194 | -4.83029   | -2.27211   | 4.830294   | down       | -4.98916   | -2.3188    | 4.989164   | down       | -9.83235   | -3.29754   | 9.832348   | down       | -10.1557   | -3.34422   | 10.15574   | down       | -2.38903   | -1.59923   | 2.389027   | down       | -3.12963   | -1.69459   | 3.129626   | down       | 5365.548 | 6539.874 | 1110.381 | 545.4921 | 170.1339 | KSP37   | Ksp37                   | chr8              | 88888    | chr4    | 15570963 |    |       |       |
| NM_20161 | -15.5828   | -3.96189   | 15.58283   | down       | -5.55081   | -2.4727    | 5.550806   | down       | -30.3645   | -4.92432   | 30.36454   | down       | -10.8162   | -3.43513   | 10.81624   | down       | -8.92242   | -3.15744   | 8.922422   | down       | -3.17828   | -1.66825   | 3.178282   | down       | 14506.31 | 5167.336 | 930.9164 | 477.7387 | 1625.827 | TCF7    | MGC4773:transcript:6932 | chr5              | 1.33E+08 |         |          |    |       |       |

| SEQ_ID    | Fold chang | Log Fold c | Absolute F | Regulation | Fold chang | Log Fold c | Absolute F | Regulation | [AE-1] (norm) | [AE-3] (norm) | [AE-10] (norm) | GENE      | NA | SYNONYM                     | DESCRIP | NCLB | GENE      | CHROM     | STRAND | START | STOP | GO | biologi | GO | cellular | GO | molecul | UniGene | Dbid | TIGRID | EnsemblID |
|-----------|------------|------------|------------|------------|------------|------------|------------|------------|---------------|---------------|----------------|-----------|----|-----------------------------|---------|------|-----------|-----------|--------|-------|------|----|---------|----|----------|----|---------|---------|------|--------|-----------|
| XM_940804 | -2.09598   | -1.06894   | 2.095982   | down       | -2.02463   | -1.01894   | 2.02463    | down       | 5092.4067     | 2832.6348     | 1397.8221      | WDR112    | +  | WAS protein:40253           | chr15   | +    | 2678.2969 | 68283543  |        |       |      |    |         |    |          |    |         |         |      |        |           |
| XM_92857  | -2.017128  | -1.012302  | 2.0171278  | down       | -2.584037  | -1.369627  | 2.5840372  | down       | 10108.737     | 5011.451      | 1939.3881      | LOC64555- | +  | hypothetical:645550         | chr4    | +    | 7411.345  | 7416216   |        |       |      |    |         |    |          |    |         |         |      |        |           |
| BC069310  | -2.047157  | -1.033622  | 2.047157   | down       | -2.141696  | -1.098754  | 2.1416964  | down       | 2749.0254     | 1342.8503     | 627.0031       | GYPB      | +  | GYPB CD235G/glycophorin 29A | chr8    | +    | 145136760 | 145159940 |        |       |      |    |         |    |          |    |         |         |      |        |           |
| NM_00051  | -2.053443  | -1.03804   |            |            |            |            |            |            |               |               |                |           |    |                             |         |      |           |           |        |       |      |    |         |    |          |    |         |         |      |        |           |

| SEQ_ID    | Fold change | Log Fold c | Absolute F | Regulation | Fold change | Log Fold c | Absolute F | Regulation | [AE-1]nor | [AE-3]nor | [AE-10]nor | GENE_NA   | SYNONYM | DESCRIPTION | INCHI      | GENE      | CHROM     | STRAND        | START                     | STOP                     | GO biologi   | GO cellular | GO molecu  | UniGene       | Dbid          | TIGRID              | Ensembl             |
|-----------|-------------|------------|------------|------------|-------------|------------|------------|------------|-----------|-----------|------------|-----------|---------|-------------|------------|-----------|-----------|---------------|---------------------------|--------------------------|--------------|-------------|------------|---------------|---------------|---------------------|---------------------|
| NM_023126 | -1.003792   | -1.022345  | 1.003792   | down       | 1.022345    | 1.003792   | 1.003792   | down       | 1.022345  | 1.003792  | 1.003792   | MM28      |         | 509180128   | 65018543   | MM28      | chr17     | 42377142      | 42377142                  | GO:0005737               | GO:0005737   | GO:0005737  | U14633     | ref:NM_023126 | ref:G14633    | ref:ENST00000338389 |                     |
| BC020584  | -2.007327   | -1.003508  | 2.007327   | down       | 2.007327    | 1.003508   | 2.007327   | up         | 2.007327  | 1.003508  | 2.007327   | CD9       |         | 2929.4002   | 1957.5294  | 5298.784  | CD9       | MIC2          | MIC2                      | GO:0007154               | GO:0005737   | GO:0005118  | G54534     | ref:NM_002128 | ref:G54534    | ref:ENST00000338192 |                     |
| AL113657  | -2.012777   | -1.009187  | 2.012778   | down       | 2.012778    | 1.009187   | 2.012778   | up         | 2.012778  | 1.009187  | 2.012778   | P1P8      |         | 279.509     | 138.86736  | 291.6413  | P1P8      | ANN1          | P1P8                      | GO:0007264               | GO:0005058   | GO:0005058  | Hs.500197  | ref:NM_006126 | ref:G50058    | ref:ENST00000225441 |                     |
| AY093698  | -2.022516   | -1.016151  | 2.022516   | down       | 2.022516    | 1.016151   | 2.022516   | up         | 2.022516  | 1.016151  | 2.022516   | CD28      |         | 805.2233    | 420.37894  | 1049.9675 | CD28      | MGC13829      | CD28                      | GO:0006959               | GO:0005588   | GO:0001502  | Hs.591629  | ref:NM_006126 | ref:G55829    | ref:ENST00000331640 |                     |
| BT775289  | -2.022681   | -1.016269  | 2.022681   | down       | 2.022681    | 1.016269   | 2.022681   | up         | 2.022681  | 1.016269  | 2.022681   | PRMT1     |         | 8691.964    | 4297.249   | 11264.491 | PRMT1     | ANN1          | PRMT1                     | GO:0001770               | GO:0005653   | GO:0005051  | Hs.20521   | ref:NM_198931 | ref:G20521    | ref:ENST00000326130 |                     |
| AK131309  | -2.030921   | -1.022134  | 2.030926   | down       | 2.030926    | 1.022134   | 2.030926   | up         | 2.030926  | 1.022134  | 2.030926   | ZSCAN2A   |         | 501.29095   | 246.82942  | 1070.169  | ZSCAN2A   | FLJ20595      | zinc finger s45993        | GO:0006351               | GO:0005652   | GO:0003708  | Hs.594223  | ref:NM_017324 | ref:G59423    | ref:ENST00000334141 |                     |
| NM_000732 | -2.031943   | -1.022844  | 2.031943   | down       | 2.031943    | 1.022844   | 2.031943   | up         | 2.031943  | 1.022844  | 2.031943   | CD247     |         | 38085.7183  | 2098.6528  | 95701.71  | CD247     | CD3-ZETA      | CD247                     | GO:0008818               | GO:0005573   | GO:0004883  | Hs.156445  | ref:NM_198718 | ref:G15645    | ref:ENST00000336719 |                     |
| NM_031954 | -2.035589   | -1.025425  | 2.035588   | down       | 2.035588    | 1.025425   | 2.035588   | up         | 2.035588  | 1.025425  | 2.035588   | KSP37     |         | 1110.812    | 545.49207  | 578.1927  | KSP37     |               | Ksp37                     | GO:0003888               |              |             |            | ref:NM_031954 | ref:G38888    | ref:ENST00000382324 |                     |
| BC006063  | -2.060292   | -1.042849  | 2.060291   | down       | 2.060291    | 1.042849   | 2.060291   | up         | 2.060291  | 1.042849  | 2.060291   | ZNF549    |         | 363.8042    | 176.56654  | 466.47098 | ZNF549    | FLJ34917      | zinc finger p25601        | GO:0006350               | GO:0005652   | GO:0003678  | Hs.564295  | ref:NM_153718 | ref:G56429    | ref:ENST00000240719 |                     |
| NM_000544 | -2.064993   | -1.046093  | 2.064993   | down       | 2.064993    | 1.046093   | 2.064993   | up         | 2.064993  | 1.046093  | 2.064993   | TNF53     |         | 812.82684   | 397.99255  | 1343.2498 | TNF53     | FLS1          | JTRPS_tumor protein1751   | GO:0006228               | GO:0005652   | GO:0007073  | Hs.654481  | ref:NM_000544 | ref:G65448    | ref:ENST00000269305 |                     |
| NM_148414 | -2.064933   | -1.046093  | 2.064932   | down       | 2.064932    | 1.046093   | 2.064932   | up         | 2.064932  | 1.046093  | 2.064932   | ATXN2L    |         | 2680.2505   | 1297.9843  | 3609.96   | ATXN2L    | A2D           | ADZL                      | GO:0008151               | GO:0005557   | GO:0003667  | Hs.460499  | ref:NM_145N   | ref:P080567   | ref:ENST00000336783 |                     |
| XM_933159 | -2.065621   | -1.046576  | 2.065621   | down       | 2.065621    | 1.046576   | 2.065621   | up         | 2.065621  | 1.046576  | 2.065621   | FLJ14352  |         | 930.7989    | 450.61456  | 1029.4928 | FLJ14352  | FLJ14352      | FLJ14352                  | GO:0001511               | GO:0001511   | GO:0001511  | Hs.370937  | ref:NM_172N   | ref:P186276   | ref:ENST00000374562 |                     |
| BC080574  | -2.071888   | -1.059646  | 2.071881   | down       | 2.071881    | 1.059646   | 2.071881   | up         | 2.071881  | 1.059646  | 2.071881   | TAPPB     |         | 4872.4946   | 2352.1957  | 8048.6025 | TAPPB     | NCG517TAT     | bindin9692                | GO:0006351               | GO:0005653   | GO:0003678  | Hs.555947  | ref:NM_016268 | ref:G55947    | ref:ENST00000265165 |                     |
| NM_016268 | -2.074857   | -1.058312  | 2.074859   | down       | 2.074859    | 1.058312   | 2.074859   | up         | 2.074859  | 1.058312  | 2.074859   | L66       |         | 708.8237    | 341.62534  | 804.5166  | L66       | DKFZ          | S5860                     | lymphoblastoid cell line | GO:0006351   | GO:0005653  | GO:0003678 | Hs.555947     | ref:NM_016268 | ref:G55947          | ref:ENST00000265165 |
| XI3890    | -2.084304   | -1.059566  | 2.084309   | down       | 2.084309    | 1.059566   | 2.084309   | up         | 2.084309  | 1.059566  | 2.084309   | P0UP2     |         | 151.5631    | 7209.05066 | 3034.6174 | P0UP2     | GO:0008077    | P0UP2                     | GO:0008077               | GO:0005653   | GO:0003678  | Hs.525403  | ref:NM_016268 | ref:G55947    | ref:ENST00000369477 |                     |
| NM_017900 | -2.088881   | -1.06273   | 2.088881   | down       | 2.088881    | 1.06273    | 2.088881   | up         | 2.088881  | 1.06273   | 2.088881   | TPCN1     |         | 407.14484   | 194.91049  | 405.8492  | TPCN1     | FLJ20612      | two pore seq s5323        | GO:0006351               | GO:0001602   | GO:0005244  | Hs.524763  | ref:NM_017900 | ref:G52476    | ref:ENST00000335509 |                     |
| NM_016424 | -2.089448   | -1.063144  | 2.089497   | down       | 2.089497    | 1.063144   | 2.089497   | up         | 2.089497  | 1.063144  | 2.089497   | ZNF219    |         | 216.10718   | 199.14392  | 865.337   | ZNF219    | ZFP219        |                           | GO:0006351               | GO:0005653   | GO:0003708  | Hs.250493  | ref:NM_016268 | ref:G55947    | ref:ENST00000369477 |                     |
| NM_006754 | -2.089497   | -1.063156  | 2.089499   | down       | 2.089499    | 1.063156   | 2.089499   | up         | 2.089499  | 1.063156  | 2.089499   | SURF5     |         | 460.51825   | 220.39671  | 592.3665  | SURF5     | MED22         | ME surfeit 5              | GO:0006351               | GO:0005653   | GO:0003678  | Hs.6837    | ref:NM_006754 | ref:G6837     | ref:ENST00000344469 |                     |
| XM_931811 | -2.091201   | -1.064532  | 2.091209   | down       | 2.091209    | 1.064532   | 2.091209   | up         | 2.091209  | 1.064532  | 2.091209   | LAC3795   |         | 247.21564   | 118.22468  | 282.5906  | LAC3795   |               | hypothetical:63795        | GO:0008151               | GO:0000011   | GO:0003667  | Hs.78354   | ref:NM_016268 | ref:G55947    | ref:ENST00000344469 |                     |
| BC031091  | -2.092121   | -1.064966  | 2.092129   | down       | 2.092129    | 1.064966   | 2.092129   | up         | 2.092129  | 1.064966  | 2.092129   | GATAD1    |         | 226.1271    | 408.10661  | 256.81152 | GATAD1    | FLJ22489      | GATA zinc finger 57998    | GO:0006351               | GO:0005653   | GO:0003708  | Hs.21145   | ref:NM_016268 | ref:G55947    | ref:ENST00000287957 |                     |
| NM_20784  | -2.099672   | -1.070164  | 2.099671   | down       | 2.099671    | 1.070164   | 2.099671   | up         | 2.099671  | 1.070164  | 2.099671   | ENSA      |         | 886.20335   | 422.17096  | 852.61926 | ENSA      | MGC4319       | endosomal protein         | GO:0006351               | GO:0005653   | GO:0003678  | Hs.632456  | ref:NM_20784  | ref:G63245    | ref:ENST00000356527 |                     |
| AJ22585   | -2.119954   | -1.084033  | 2.119954   | down       | 2.119954    | 1.084033   | 2.119954   | up         | 2.119954  | 1.084033  | 2.119954   | EDG       |         | 384.7761    | 181.50209  | 209.2509  | EDG       | collagen-like | EDG2                      | GO:0001501               | GO:0005605   | GO:0001602  | Hs.146735  | ref:NM_089N   | ref:P243138   | ref:ENST00000338788 |                     |
| NM_001002 | -2.119991   | -1.084058  | 2.119996   | down       | 2.119996    | 1.084058   | 2.119996   | up         | 2.119996  | 1.084058  | 2.119996   | RP3-377H1 |         | 542.5135    | 255.90373  | 564.638   | RP3-377H1 | FLJ35429      | hypothetical:28830        | GO:0006351               | GO:0001602   | GO:0005653  | Hs.655949  | ref:NM_001002 | ref:G65594    | ref:ENST00000326012 |                     |
| NM_929621 | -2.122268   | -1.085607  | 2.122268   | down       | 2.122268    | 1.085607   | 2.122268   | up         | 2.122268  | 1.085607  | 2.122268   | EEF2      |         | 2495.8945   | 1176.0508  | 3031.3833 | EEF2      | EEF2          | similar to ac646675       | GO:0006351               | GO:0005653   | GO:0001602  | Hs.515070  | ref:NM_929621 | ref:G51507    | ref:ENST00000309311 |                     |
| NM_001961 | -2.125424   | -1.08775   | 2.125427   | down       | 2.125427    | 1.08775    | 2.125427   | up         | 2.125427  | 1.08775   | 2.125427   | EEF2      |         | 13524.476   | 6504.339   | 15292.803 | EEF2      | EEF2          | eukaryotic t1938          | GO:0006351               | GO:0005653   | GO:0005454  | Hs.655333  | ref:NM_001961 | ref:G65533    | ref:ENST00000228245 |                     |
| NM_003324 | -2.126116   | -1.08822   | 2.126117   | down       | 2.126117    | 1.08822    | 2.126117   | up         | 2.126117  | 1.08822   | 2.126117   | TPX2      |         | 491.68526   | 231.24718  | 822.34094 | TPX2      | ABC18A        | kinetochore protein 26991 | GO:0006351               | GO:0005653   | GO:0001602  | Hs.50216   | ref:NM_003324 | ref:G50216    | ref:ENST00000348977 |                     |
| BC088854  | -2.12946    | -1.090488  | 2.129459   | down       | 2.129459    | 1.090488   | 2.129459   | up         | 2.129459  | 1.090488  | 2.129459   | Clor2     |         | 497.60474   | 474.9977   | 1200.6333 | Clor2     | COTE1         | cytochrome                | GO:0006351               | GO:0001602   | GO:0003678  | Hs.348308  | ref:NM_003324 | ref:G50216    | ref:ENST00000361361 |                     |
| NM_016661 | -2.133663   | -1.093332  | 2.133663   | down       | 2.133663    | 1.093332   | 2.133663   | up         | 2.133663  | 1.093332  | 2.133663   | ARMXC3    |         | 304.52174   | 142.59596  | 296.36774 | ARMXC3    | ALEX3         | ARMADILLO 3               | GO:0006351               | GO:0001602   | GO:0005488  | Hs.592225  | ref:NM_016661 | ref:G59225    | ref:ENST00000341189 |                     |
| AF119912  | -2.138092   | -1.096324  | 2.138092   | down       | 2.138092    | 1.096324   | 2.138092   | up         | 2.138092  | 1.096324  | 2.138092   | N/A       |         | 2.3274452   | 1.218742   | 272.9358  | N/A       | N/A           | Homo sapiens              | GO:0006351               | GO:0001602   | GO:0005488  | Hs.592225  | ref:NM_016661 | ref:G59225    | ref:ENST00000341189 |                     |
| AF466365  | -2.141767   | -1.098802  | 2.141767   | down       | 2.141767    | 1.098802   | 2.141767   | up         | 2.141767  | 1.098802  | 2.141767   | MGC22014  |         | 834.11664   | 389.45255  | 903.93665 | MGC22014  | KIAA001       | hypothetical:20024        | GO:0006351               | GO:0001602   | GO:0005488  | Hs.516107  | ref:NM_016661 | ref:G59225    | ref:ENST00000341189 |                     |
| NM_021972 | -2.146671   | -1.102665  | 2.146674   | down       | 2.146674    | 1.102665   | 2.146674   | up         | 2.146674  | 1.102665  | 2.146674   | RELA      |         | 5.2530579   | 1701.7965  | 3.2530579 | RELA      | MGC13177      | v-rel                     | GO:0006351               | GO:0005653   | GO:0003708  | Hs.502875  | ref:NM_021972 | ref:G50287    | ref:ENST00000308546 |                     |
| BC002751  | -2.1498     | -1.104202  | 2.149798   | down       | 2.149798    | 1.104202   | 2.149798   | up         | 2.149798  | 1.104202  | 2.149798   | TAP2      |         | 1294.1632   | 601.99243  | 1510.625  | TAP2      | ABC18A        | kinetochore protein 26991 | GO:0006351               | GO:0005653   | GO:0001602  | Hs.50216   | ref:NM_003324 | ref:G50216    | ref:ENST00000348977 |                     |
| NM_002594 | -2.158444   | -1.109992  | 2.158443   | down       | 2.158443    | 1.109992   | 2.158443   | up         | 2.158443  | 1.109992  | 2.158443   | PDE2A     |         | 216.41919   | 100.29999  | 207.9192  | PDE2A     | PDE2A         | phosphodiesterase 2       | GO:0006351               | GO:0001602   | GO:0003678  | Hs.501163  | ref:NM_002594 | ref:G50116    | ref:ENST00000334546 |                     |
| NM_001011 | -2.160076   | -1.111082  | 2.160076   | down       | 2.160076    | 1.111082   | 2.160076   | up         | 2.160076  | 1.111082  | 2.160076   | Gcom1     |         | 419.90652   | 194.39433  | 785.4945  | Gcom1     | FLJ30973      | GRRINL1                   | GO:0006351               | GO:0001602</ |             |            |               |               |                     |                     |

|          |           |           |           |      |           |           |           |    |           |           |           |           |                                |       |       |           |           |           |           |                  |           |                      |                 |  |  |
|----------|-----------|-----------|-----------|------|-----------|-----------|-----------|----|-----------|-----------|-----------|-----------|--------------------------------|-------|-------|-----------|-----------|-----------|-----------|------------------|-----------|----------------------|-----------------|--|--|
| BC013694 | -2.826939 | -1.499241 | 2.826939  | down | 3.2857369 | 1.7162169 | 3.2857369 | up | 4980.513  | 1761.8042 | 5788.825  | P1BP1     | HNRNPIH/poly(rimmin)5725       | chr19 | +     | 748478    | 762012    | GO:000639 | GO:000563 | GO:00016         | Hs.172550 | ref:NM_002THC250052  | ENST00000349038 |  |  |
| AK126599 | -2.840814 | -1.506304 | 2.8408137 | down | 4.5866613 | 2.1974444 | 4.5866613 | up | 445.05896 | 156.6632  | 718.56104 | N/A       | N/A                            | N/A   | chr11 | -         | 65147801  | 65149679  |           |                  |           |                      |                 |  |  |
| AK123234 | -2.86621  | -1.571351 | 2.8662097 | down | 5.590797  | 2.4830514 | 5.590797  | up | 1591.444  | 3805.2485 | 21274.534 | N/A       | N/A                            | N/A   | chr19 | +         | 2996155   | 2996176   |           |                  |           |                      |                 |  |  |
| NC110493 | -2.881887 | -1.527014 | 2.881887  | down | 2.765786  | 1.4676896 | 2.765786  | up | 3365.599  | 1167.7626 | 3229.718  | MLXP      | KIAA0867/MLX intera:2877       | chr12 | +     | 12117743  | 12119232  | GO:004544 | GO:000563 | GO:003052        | Hs.437153 | ref:NM_014THC257876  | ENST00000377037 |  |  |
| BC011971 | -2.904925 | -1.538501 | 2.9049247 | down | 2.4929599 | 1.3178597 | 2.4929599 | up | 596.9862  | 205.50832 | 512.324   | AGPAT3    | LPAAAT-GA1-acylglycerol:5684   | chr21 | +     | 44109569  | 44226862  | GO:000815 | GO:000557 | GO:000384        | Hs.248785 | ref:NM_002THC246289  | ENST00000358148 |  |  |
| UT7394   | -2.912095 | -1.542057 | 2.9120951 | down | 3.0655391 | 1.6161408 | 3.0655391 | up | 359.8534  | 123.57369 | 378.81998 | KIR2DL4   | 103AS1:5.2.killer cell c1 3805 | chr19 | +     | 6006096   | 60017780  | GO:000696 | GO:000588 | GO:000487        | Hs.661219 | ref:NM_002NP365687   | ENST00000359085 |  |  |
| AY207007 | -2.950101 | -1.56072  | 2.9501013 | down | 4.126347  | 2.0448651 | 4.126347  | up | 584.6982  | 198.20209 | 817.85606 | GCOM      | FLJ30973/GRRIN.L1A c1 48571    | chr15 | +     | 55671522  | 55794235  |           |           |                  |           |                      |                 |  |  |
| BC013009 | -2.973775 | -1.572296 | 2.9737755 | down | 3.1886917 | 1.679466  | 3.1886917 | up | 582.834   | 195.99126 | 624.55727 | ZMYM3     | DXS6073E/zinc finger_19203     | chrX  | -     | 70387579  | 70391148  | GO:000727 | GO:000563 | GO:000367        | Hs.522684 | ref:NM_005THC248049  | ENST00000314425 |  |  |
| NM_01612 | -2.975538 | -1.573151 | 2.9755381 | down | 4.111949  | 2.0395585 | 4.111949  | up | 1486.2148 | 499.47766 | 205.451   | AKT2      | PKBETA/1b-akt similar:208      | chr19 | +     | 4491455   | 4548336   | GO:000646 | GO:003002 | GO:00016         | Hs.631535 | ref:NM_001THC252515  | ENST00000311278 |  |  |
| AK054965 | -2.991778 | -1.585103 | 2.9917784 | down | 4.111949  | 2.0395585 | 4.111949  | up | 475.32324 | 158.87953 | 607.52774 | N/A       | N/A                            | chr19 | +     | 56786847  | 56789442  |           |           |                  |           |                      |                 |  |  |
| NM_00716 | -2.995047 | -1.582579 | 2.9950469 | down | 4.2882682 | 2.1003951 | 4.2882682 | up | 377.74107 | 1261.3965 | 5409.2605 | SE3A2     | PRP11/PRP11splicing fact:8175  | chr19 | +     | 2187815   | 2199678   | GO:000388 | GO:000562 | GO:000367        | Hs.115232 | ref:NM_007THC246872  | ENST00000221494 |  |  |
| XM_49695 | -3.008958 | -1.589264 | 3.0089578 | down | 2.9900639 | 1.5801763 | 2.9900639 | up | 1669.7161 | 554.9515  | 1659.2316 | LOC44132  | chromosom:441325               | chr19 | +     | 7083211   | 7083563   |           |           |                  |           |                      |                 |  |  |
| AK026042 | -3.05236  | -1.609925 | 3.0523603 | down | 2.3764923 | 1.2488337 | 2.3764923 | up | 763.80055 | 200.23424 | 594.67975 | NUP210    | FLJ22389/Gnucleolar:25225      | chr3  | +     | 13368177  | 13392851  | GO:000660 | GO:000563 | GO:000551        | Hs.475525 | ref:NM_024THC254813  | ENST00000388753 |  |  |
| AK040603 | -3.068948 | -1.617744 | 3.0689485 | down | 5.0147589 | 2.3261803 | 5.0147589 | up | 825.0798  | 268.84772 | 1348.2055 | AGPAT4    | LPAAAT-GA1-acylglycerol:5684   | chr21 | +     | 44191238  | 44227206  | GO:000815 | GO:000557 | GO:000384        | Hs.248785 | ref:NM_002THC246289  | ENST00000358148 |  |  |
| BC021203 | -3.082424 | -1.624045 | 3.0824242 | down | 2.093137  | 1.0767373 | 2.093137  | up | 10446.399 | 3387.0508 | 7144.325  | PZKX1P1   | DD96MAP/PZKX1 inte:10538       | chr16 | +     | 4742185   | 47428271  |           | GO:000576 | extracellular:HS | Hs.431099 | ref:NM_001THC246125  | ENST00000294338 |  |  |
| BC014212 | -3.131077 | -1.646659 | 3.131077  | down | 3.9071353 | 1.9661112 | 3.9071353 | up | 3035.137  | 969.5858  | 3787.416  | FBS1      | FBS/FLJ116630:nt:1 64319       | chr16 | +     | 3058415   | 30588559  |           |           |                  |           |                      |                 |  |  |
| BC031654 | -3.131715 | -1.646953 | 3.1317154 | down | 3.150161  | 1.6554256 | 3.150161  | up | 553.9955  | 176.89842 | 557.2585  | FAM53B    | KIAA1040/family with: 9679     | chr10 | +     | 126345752 | 126422828 | GO:000815 | GO:000557 | GO:000367        | Hs.129195 | ref:NM_014THC247587  | ENST00000337318 |  |  |
| BC031562 | -3.173596 | -1.666119 | 3.1735962 | down | 5.0967999 | 2.3478854 | 5.0967999 | up | 877.8108  | 276.59814 | 4840.0726 | AKR7A3    | AFAR2_alko-ecto:29277          | chr1  | +     | 1948166   | 1948789   | GO:000608 | GO:000582 | GO:000403        | Hs.6980   | ref:NM_012THC247536  | ENST00000361640 |  |  |
| BC028309 | -3.20226  | -1.679271 | 3.202604  | down | 2.2778954 | 1.1883917 | 2.2778954 | up | 8208.072  | 2562.8918 | 5840.793  | MLXP      | KIAA0867/MLX intera:2877       | chr12 | +     | 12178388  | 121184663 | GO:004544 | GO:000563 | GO:003052        | Hs.437153 | ref:NM_014THC257876  | ENST00000377037 |  |  |
| AY126869 | -3.203304 | -1.679561 | 3.2033039 | down | 3.7408102 | 1.9033508 | 3.7408102 | up | 473.8027  | 147.91063 | 555.2056  | CENTG1    | AGAP2/FLJcentaurin, g1 80769   | chr12 | +     | 56460661  | 56418296  | GO:000716 | GO:000562 | GO:00016         | Hs.302435 | ens:ENST0THC267476   | ENST00000257897 |  |  |
| NM_03296 | -3.291968 | -1.718195 | 3.291968  | down | 3.001638  | 1.5857143 | 3.001638  | up | 1913.7395 | 581.536   | 1744.9171 | CLC14     | CC-1CC-3/Chamactin: 6538       | chr16 | +     | 31334804  | 31337852  |           |           |                  |           |                      |                 |  |  |
| AK126136 | -3.311329 | -1.72741  | 3.3113289 | down | 4.7013192 | 2.2330656 | 4.7013192 | up | 1673.5659 | 421.99661 | 1941.6265 | AKNA      | KIAA1968/AT-hook motif:1099    | chr9  | +     | 11617798  | 116200573 |           |           |                  |           |                      |                 |  |  |
| NM_00073 | -3.311783 | -1.727608 | 3.3117833 | down | 2.9045762 | 1.5383277 | 2.9045762 | up | 334.23215 | 100.94599 | 293.21576 | CHRM1     | HIMJ1M1/cholesterin: 11328     | chr11 | +     | 62432726  | 62445588  | GO:000646 | GO:000562 | GO:000158        | Hs.632119 | ref:NM_000THC270057  | ENST00000306960 |  |  |
| BC027459 | -3.33066  | -1.735808 | 3.3306596 | down | 2.1970172 | 1.1355462 | 2.1970172 | up | 348.54956 | 104.64881 | 229.91524 | PP5K2B    | PIPSK1B/Phosphatidyl 8186      | chr16 | +     | 34185753  | 34209301  | GO:000716 | GO:000573 | GO:000505        | Hs.260603 | ref:NM_003THC2586937 |                 |  |  |
| NM_00363 | -3.39068  | -1.761575 | 3.39068   | down | 6.1342341 | 2.6168832 | 6.1342341 | up | 370.4958  | 907.33887 | 5569.328  | KCNAB2    | AKR6A5/Doestain c1 8154        | chr1  | +     | 6008966   | 6008310   | GO:000681 | GO:000573 | GO:000521        | Hs.444097 | ref:NM_003THC246966  | ENST00000341524 |  |  |
| NM_00687 | -3.477512 | -1.798056 | 3.4775125 | down | 5.5460015 | 2.471448  | 5.5460015 | up | 2827.494  | 813.07947 | 4509.324  | DSTN      | ACTDP/APdesmin (actin) 1134    | chr20 | +     | 17498958  | 17536652  | GO:000815 | GO:000562 | GO:000377        | Hs.304192 | ref:NM_001THC247990  | ENST00000246069 |  |  |
| BC104873 | -3.625565 | -1.858266 | 3.6255649 | down | 3.0362189 | 1.6022758 | 3.0362189 | up | 391.17813 | 107.89439 | 327.591   | CREBL2    | MGC11731_cAMP respo:189        | chr12 | +     | 12656149  | 12687308  | GO:000635 | GO:000563 | GO:000378        | Hs.591156 | ref:NM_001THC250391  | ENST00000228865 |  |  |
| NM_00476 | -3.676933 | -1.879443 | 3.6769330 | down | 3.2878839 | 1.1715951 | 3.2878839 | up | 18143.514 | 4931.2    | 16123.213 | NRGN      | RC7/rlng neurogranin:4900      | chr11 | +     | 124114951 | 124123209 | GO:000716 | GO:000562 | GO:000551        | Hs.524116 | ref:NM_000THC246156  | ENST00000284292 |  |  |
| BC036352 | -3.698201 | -1.898824 | 3.6982009 | down | 6.9462127 | 2.7962285 | 6.9462127 | up | 615.64136 | 166.4075  | 315.641   | AGPAT3    | LPAAAT-GA1-acylglycerol:5684   | chr21 | +     | 44169316  | 44227410  | GO:000815 | GO:000557 | GO:000384        | Hs.248785 | ref:NM_002THC246289  | ENST00000358148 |  |  |
| BC040943 | -3.701461 | -1.888095 | 3.7014616 | down | 2.2293232 | 1.1565476 | 2.2293232 | up | 3801.9624 | 1027.1517 | 2289.7067 | WASF2     | SCAR2/WAWAS protei:10163       | chr1  | +     | 27608887  | 27689247  | GO:000718 | GO:000585 | GO:000377        | Hs.590909 | ref:NM_006THC254474  | ENST00000374019 |  |  |
| XM_93295 | -3.776419 | -1.917019 | 3.7764192 | down | 3.1024985 | 1.6334305 | 3.1024985 | up | 2668.7747 | 706.6945  | 2192.5186 | LOC653307 | similar to hsp:653307          | chr5  | +     | 176985536 | 176914084 |           |           |                  |           |                      |                 |  |  |
| BC028035 | -3.816979 | -1.932431 | 3.8169787 | down | 2.7978133 | 1.4842997 | 2.7978133 | up | 19404.535 | 5083.7417 | 14223.36  | NRGN      | RC3/rlng neurogranin:4900      | chr11 | +     | 124115150 | 124122312 | GO:000716 | GO:000562 | GO:000551        | Hs.524116 | ref:NM_006THC246156  | ENST00000284292 |  |  |
| AF225896 | -3.920182 | -1.970921 | 3.9201822 | down | 3.6298905 | 1.8599838 | 3.6298905 | up | 7033.781  | 1794.2485 | 6512.7803 | N/A       | N/A                            | N/A   | chr2  | +         | 218276876 | 218517006 |           |                  |           |                      |                 |  |  |
| BC029098 | -3.942846 | -1.979238 | 3.9428465 | down | 3.931881  | 1.9752197 | 3.931881  | up | 1009.1406 | 255.94214 | 1006.3341 | MTS1      | FLJ44946/actin:9788            | chr16 | +     | 125634309 | 125682424 | GO:000692 | GO:000172 | GO:000014        | Hs.474751 | ref:NM_002THC246530  | ENST00000216181 |  |  |
| NM_93151 | -3.989076 | -1.99122  | 3.9890755 | down | 3.071743  | 1.6190575 | 3.071743  | up | 1308.808  | 328.7764  | 1009.9166 | UBX3D7    | KIAA0794_UBX domai:26043       | chr14 | +     | 19758062  | 197643672 |           |           |                  |           |                      |                 |  |  |
| NM_00576 | -4.329795 | -2.114429 | 4.3297952 | down | 2.2114504 | 1.1449929 | 2.2114504 | up | 13880.122 | 3205.7224 | 7089.296  | PZKX1P1   | DD96MAP/PZKX1 inte:10538       | chr16 | +     | 47421847  | 47428358  |           | GO:000576 | extracellular:HS | Hs.431099 | ref:NM_005THC261250  | ENST00000294338 |  |  |
| BC026002 | -4.590517 | -2.198657 | 4.5905168 | down | 2.9709912 | 1.5709443 | 2.9709912 | up | 1009.8599 | 219.98828 | 653.58325 | GRAP2     | GAD5/GRAGR2B-retai:9402        | chr22 | +     | 38672801  | 38697330  | GO:000724 | GO:000573 | GO:000507        | Hs.517499 | ref:NM_004THC262474  | ENST00000344138 |  |  |
| AK127453 | -4.679191 | -2.226259 | 4.6791914 | down | 5.706807  | 2.5120597 | 5.706807  | up | 993.36005 | 212.2931  | 1211.3629 | N/A       | N/A                            | N/A   | chr19 | +         | 7441415   | 7444285   |           |                  |           |                      |                 |  |  |
| NM_00394 | -5.588296 | -2.482409 | 5.5882964 | down | 4.1105312 | 2.0395248 | 4.1105312 | up | 13489.678 | 2415.916  | 9922.477  | SELENBP1  | FLJ138133_selenium bio:8991    | chr1  | +     | 149603403 | 149611788 |           |           |                  |           |                      |                 |  |  |
| BC040920 | -5.618144 | -2.628801 | 5.6181435 | down | 4.1154795 | 2.0410605 | 4.1154795 | up | 3571.5598 | 577.4417  | 2376.495  | MXR9      | DFNA17/F17provia: hca:627      | chr22 | +     | 359510    |           |           |           |                  |           |                      |                 |  |  |





|           |           |           |           |    |           |           |           |      |           |           |           |         |                                |           |       |           |           |            |                 |           |           |                      |                     |                |
|-----------|-----------|-----------|-----------|----|-----------|-----------|-----------|------|-----------|-----------|-----------|---------|--------------------------------|-----------|-------|-----------|-----------|------------|-----------------|-----------|-----------|----------------------|---------------------|----------------|
| BC104818  | 2.5415755 | 1.3457231 | 2.5415755 | up | -7.763201 | -2.965662 | 7.7632015 | down | 3628.0146 | 9220.873  | 1187.7668 | ORM1    | AGP-AJAgloromacoi5004          | chr9      | +     | 116125209 | 116128303 | GO:000695  | GO:000557       | GO:000551 | Hs.567311 | ref:NM_0012HC255875  | ENST0000259396      |                |
| NM_00395  | 2.5460857 | 1.348281  | 2.5460857 | up | -2.085285 | -1.060245 | 2.085285  | down | 2099.985  | 5346.7417 | 2564.534  | SOCS3   | CIS1(cch1)suppressor c9021     | chr17     | -     | 73864453  | 73867753  | GO:001558  | regulation      | GO:000480 | Hs.529773 | ref:NM_0012HC246186  | ENST0000330871      |                |
| NM_00063  | 2.6014512 | 1.3792654 | 2.6014512 | up | -3.165678 | -1.662837 | 3.165678  | down | 3004.8271 | 7817.5137 | 1765.1825 | NT4     | MG238109.neomycin-p1-4689      | chr3      | +     | 12884740  | 12885259  | GO:000641  | transactivation | GO:000552 | Hs.107812 | ref:NM_0012HC232591  | ENST0000327744      |                |
| NM_016000 | 2.571005  | 1.3623324 | 2.571005  | up | -3.497719 | -1.80645  | 3.4977194 | down | 707.38763 | 1818.6911 | 519.96655 | AHBD5   | CDSC8GHis hydrolyase cs2599    | chr3      | +     | 43707378  | 43735296  | GO:000650  | GO:000581       | GO:000417 | Hs.19385  | ref:NM_01612HC246405 | ENST0000013894      |                |
| NM_012388 | 2.572496  | 1.3631688 | 2.572496  | up | -6.511116 | -2.706205 | 6.5111159 | down | 5337.828  | 13731.541 | 2109.9388 | PAD1A   | PADPCAD1peptidyl_4i_2169       | chr1      | +     | 15702778  | 15763082  | GO:000635  | GO:000563       | GO:000466 | Hs.522969 | ref:NM_01212HC248926 | ENST0000375448      |                |
| BC048107  | 2.5898415 | 1.3728638 | 2.5898415 | up | -3.374525 | -1.754864 | 3.3745249 | down | 570.7108  | 1478.0272 | 437.99564 | ZNF333  | KHIA1806_zinc_finger_h3442     | chr19     | +     | 14661880  | 14705557  | GO:000635  | GO:000562       | GO:000367 | Hs.15215  | ens:ENST0000292530   | ENST0000292530      |                |
| NM_021952 | 2.5900005 | 1.3729254 | 2.5900005 | up | -2.87579  | -1.523958 | 2.8757897 | down | 799.8725  | 2071.6702 | 720.38306 | HLX1    | HBA2_H2.0-like_hc8149          | chr1      | +     | 219119381 | 219125018 | GO:000635  | GO:000563       | GO:000370 | Hs.74870  | ref:NM_02112HC275576 | ENST0000366903      |                |
| NM_00773  | 2.597023  | 1.3785588 | 2.597023  | up | -2.493384 | -1.319262 | 2.4933836 | down | 2096.8174 | 7003.6973 | 2806.6166 | TREM1   | TRIM-1 triglycerin_e54210      | chr6      | -     | 41351717  | 41362416  | GO:000695  | GO:000588       | GO:000408 | Hs.283022 | ref:NM_01812HC260703 | ENST0000244709      |                |
| NM_00363  | 2.604889  | 1.3782274 | 2.604889  | up | -4.428728 | -2.146892 | 4.4287283 | down | 3004.8271 | 7817.5137 | 1765.1825 | NT4     | MG238109.neomycin-p1-4689      | chr22     | +     | 38540909  | 38540905  | GO:000641  | transactivation | GO:000552 | Hs.107812 | ref:NM_0012HC246402  | ENST0000330951      |                |
| BC005051  | 2.607897  | 1.3828869 | 2.607897  | up | -2.32974  | -1.220169 | 2.3297402 | down | 1729.4148 | 4510.1357 | 1953.8964 | CoIF6   | HLJ103422.chromosom55122       | chr6      | -     | 88441693  | 88468382  | GO:000007  | GO:0005737      | cytoplasm | Hs.104019 | ref:NM_0012HC246405  | ENST0000330951      |                |
| NM_00644  | 2.6113405 | 1.3847906 | 2.6113405 | up | -2.014276 | -1.010262 | 2.0142765 | down | 41.9567   | 105.7592  | 534.0673  | MTHF6   | FLJ19268.5.10-methen-15822     | chr5      | -     | 77924374  | 77976398  | GO:000399  | GO:000582       | GO:000028 | Hs.459049 | ref:NM_00612HC270724 | ENST0000258874      |                |
| NM_01473  | 2.6123878 | 1.3853691 | 2.6123878 | up | -2.973147 | -1.571991 | 2.973147  | down | 2182.723  | 5702.119  | 1917.8373 | RASSF2  | DKPZp781(Ras associated)5107   | chr20     | +     | 4708669   | 4752321   | GO:000704  | GO:000563       | GO:000551 | Hs.631504 | ref:NM_01412HC246845 | ENST0000379400      |                |
| NM_00100  | 2.6129408 | 1.3856744 | 2.6129408 | up | -2.802053 | -1.486484 | 2.8020528 | down | 132.96442 | 347.42816 | 123.99059 | DSIP13  | BEDPPIJ3.501 specifi51720      | chr10     | +     | 76524195  | 76538976  | GO:000647  | protein         | GO:000472 | Hs.178170 | ref:NM_0112HC247508  | ENST0000330673      |                |
| NM_00384  | 2.6234227 | 1.3912808 | 2.6234227 | up | -3.493204 | -2.168859 | 3.4932007 | down | 1012.8095 | 2657.0283 | 148.47624 | CMT2E   | CKLZP208.CKL-like_1130225      | chr16     | +     | 6555181   | 65579679  | GO:000693  | GO:000561       | GO:000512 | Hs.195685 | ref:NM_0144NP140032  | ENST0000268595      |                |
| BC093762  | 2.6259952 | 1.3928643 | 2.6259952 | up | -3.618542 | -1.855409 | 3.6184523 | down | 618.0896  | 1623.1003 | 448.55807 | PPIA    | CYPA/CYP_peptidyl_4i_5478      | chr7      | +     | 44802804  | 44807725  | GO:000647  | protein         | foh       | GO:000378 | Hs.35631             | ref:NM_0012HC256614 | ENST0000359568 |
| BC004564  | 2.6385442 | 1.3997422 | 2.6385442 | up | -2.366543 | -1.242781 | 2.3665425 | down | 7778.158  | 20523.014 | 8672.151  | DOK3    | FLJ22570F.docking_pp29925      | chr5      | -     | 176861520 | 176869992 | GO:000547  | GO:000573       | GO:000515 | Hs.153343 | ref:NM_02412HC249773 | ENST0000351798      |                |
| BC100942  | 2.641998  | 1.4016294 | 2.641998  | up | -4.027571 | -2.00991  | 4.0275712 | down | 245.59038 | 648.8493  | 161.10188 | UNQ3033 | MGC11916(LAIR long) 284415     | chr19     | +     | 59259252  | 59258996  |            |                 |           |           |                      |                     |                |
| BC029125  | 2.66337   | 1.4132528 | 2.66337   | up | -2.783581 | -1.476929 | 2.783581  | down | 2550.738  | 6793.559  | 2404.5825 | FRP1L   | ALXR1P916(fornyl) pep2i_2584   | chr19     | +     | 56963709  | 56965589  | GO:000692  | GO:000588       | GO:000158 | Hs.99855  | ref:NM_0012HC247886  | ENST0000340023      |                |
| NM_00178  | 2.6717969 | 1.4178104 | 2.6717969 | up | -4.579967 | -2.193337 | 4.5799674 | down | 2583.0996 | 6901.5176 | 1506.8923 | CDA     | CDD_cytidine dea9778           | chr1      | +     | 20717112  | 20817983  | GO:000574  | GO:000557       | GO:000188 | Hs.466910 | ref:NM_001NP1079190  | ENST0000033701      |                |
| NM_00384  | 2.6988776 | 1.424263  | 2.6988776 | up | -2.329141 | -1.215331 | 2.3219408 | down | 2851.0842 | 7748.8037 | 3682.9985 | SH2C    | KIAA1725(dinghot_hc8564)       | chr17     | +     | 24977900  | 25281144  | GO:000647  | GO:000585       | GO:000377 | Hs.634754 | gb:AB0272            | THC254332           |                |
| NM_03338  | 2.7178446 | 1.442463  | 2.7178446 | up | -2.33397  | -1.222786 | 2.33397   | down | 1064.1598 | 2899.4778 | 1242.2944 | CLIF    | CS23CFL1.chemokine-151192      | chr16     | +     | 65143995  | 65157471  | GO:000693  | GO:000583       | GO:000809 | Hs.15159  | ref:NM_01612HC250318 | ENST0000264001      |                |
| BC004380  | 2.7246639 | 1.4460783 | 2.7246639 | up | -4.300887 | -2.104634 | 4.3008875 | down | 2124.9033 | 5885.7637 | 1361.292  | GLT1F   | FLJ31978.1 glycoyltran_14423   | chr12     | +     | 129404033 | 128035462 | GO:000958  | GO:000587       | GO:001674 | Hs.655668 | ref:NM_14412HC247325 | ENST0000281703      |                |
| NM_01534  | 2.7386129 | 1.4534453 | 2.7386129 | up | -2.741129 | -1.45477  | 2.7411287 | down | 1196.4146 | 3276.5164 | 1195.3165 | DAAM2   | KIAA0813(disevelhet) 23500     | chr6      | +     | 3988770   | 3998619   | GO:0016043 | cellular        | GO:000377 | Hs.652207 | ref:NM_01512HC249547 | ENST0000274867      |                |
| NM_00146  | 2.7393591 | 1.4538384 | 2.7393591 | up | -2.459629 | -1.298441 | 2.4596293 | down | 372.80374 | 1021.2433 | 415.20212 | PYB     | ADAPIR07.FYN bindin_2533       | chr10     | +     | 39141113  | 39255424  | GO:000646  | GO:000563       | GO:000510 | Hs.370503 | ref:NM_0012HC2472026 |                     |                |
| NM_00384  | 2.7554701 | 1.4622985 | 2.7554701 | up | -3.926568 | -1.973269 | 3.9265685 | down | 282.30994 | 777.8966  | 198.21105 | HCCT2   | FLJ40123(MHLA meta) 253018     | chr6      | +     | 31333592  | 31278775  | GO:000693  | GO:000563       | GO:000370 | Hs.654096 | ref:NM_18112HC248079 | ENST0000376240      |                |
| NM_00182  | 2.7557032 | 1.4624205 | 2.7557032 | up | -2.321941 | -1.215331 | 2.3219408 | down | 634.65715 | 1748.9174 | 753.2136  | DLB     | CCBL1(CBI_Ca-B_M) 0867         | chr17     | +     | 118581199 | 118664609 | GO:000647  | GO:000557       | GO:000422 | Hs.654979 | ref:NM_0012HC247703  | ENST0000262603      |                |
| NM_02448  | 2.7694968 | 1.4876251 | 2.7694968 | up | -4.027571 | -2.00991  | 4.0275712 | down | 6296.272  | 17408.857 | 2573.9617 | MPM25   | MPM2023(MHLA meta) 64386       | chr6      | +     | 3036682   | 3050728   | GO:000027  | GO:000557       | GO:000422 | Hs.654979 | ref:NM_0012HC247511  | ENST0000336577      |                |
| BC005044  | 2.7771483 | 1.4736042 | 2.7771483 | up | -2.463346 | -1.300619 | 2.4633457 | down | 5410.5044 | 15025.773 | 6099.742  | NFE2    | NFE2p245 nuclear fact4778      | chr12     | +     | 52972164  | 52981058  | GO:000635  | GO:000563       | GO:000370 | Hs.75643  | ref:NM_00612HC260203 | ENST0000312156      |                |
| AK007259  | 2.8087315 | 1.4899187 | 2.8087315 | up | -4.303719 | -2.105584 | 4.3037194 | down | 791.29706 | 2222.541  | 516.4233  | N/A     | N/A_Homo sapienNA              | chr5      | -     | 176868007 | 176869989 |            |                 |           |           |                      |                     |                |
| NM_00569  | 2.8124222 | 1.4918132 | 2.8124222 | up | -3.764341 | -1.91297  | 3.7643414 | down | 220.78803 | 620.94073 | 164.95333 | PYGM    | GIL_phosphoryla5837            | chr11     | +     | 46427065  | 46428763  | GO:000575  | carbohydr       | GO:000160 | Hs.154804 | ref:NM_0012HC246641  | ENST00000164139     |                |
| NM_00384  | 2.8327772 | 1.5021272 | 2.8327772 | up | -5.058708 | -2.338769 | 5.0587078 | down | 1593.9141 | 4155.2036 | 895.4943  | SIGLEC5 | GO170CD3(Saaleic acid)8778     | chr16     | +     | 5680995   | 56831696  | GO:000715  | GO:001602       | GO:000551 | Hs.310333 | ref:NM_0012HC2474272 |                     |                |
| BC027951  | 2.8608493 | 1.5205225 | 2.8608493 | up | -2.288792 | -1.708758 | 2.2887924 | down | 2165.7941 | 621.3402  | 190.08249 | C20a052 | HEPL                           | CD3808222 | chr20 | +         | 54420770  | 54462337   | GO:000688       | GO:001562 | GO:000377 | Hs.473144            | ref:NM_0012HC248833 | ENST0000360314 |
| AJ287588  | 2.8957028 | 1.5319135 | 2.8957028 | up | -4.771567 | -2.254463 | 4.7715669 | down | 1218.1829 | 3527.4956 | 739.27405 | LRR4C   | NAG14 leucine rich_61401       | chr7      | +     | 127455797 | 127482838 | GO:001602  | GO:000551       | Hs.655003 |           | ref:NM_02212HC247080 | ENST0000249363      |                |
| NM_00103  | 2.9019863 | 1.5370407 | 2.9019863 | up | -2.075563 | -1.053053 | 2.0755634 | down | 457.4206  | 1327.4823 | 69.55084  | PDE4B   | FKZP686(phosphodiase) 5142     | chr1      | +     | 66570380  | 66612849  | GO:000716  | GO:000562       | GO:000382 | Hs.198072 | ref:NM_0012HC263396  | ENST0000371045      |                |
| NM_02508  | 2.9187834 | 1.5453672 | 2.9187834 | up | -2.793561 | -1.482105 | 2.7935606 | down | 507.06195 | 1480.004  | 529.79126 | FEAR2   | FFAZR2P6F(fire fatty acid)2697 | chr1      | +     | 40624356  | 40633449  | GO:000716  | GO:000588       | GO:000158 | Hs.248056 | ref:NM_0012HC260286  | ENST0000265459      |                |
| NM_00384  | 2.9229869 | 1.5474433 | 2.9229869 | up | -3.60168  | -1.84867  | 3.60168   | down | 1933.161  | 5650.604  | 1568.8802 | C1orf24 | FLJ32828(chromosom11)18646     | chr1      | +     | 183029674 | 183210267 | GO:000815  | GO:000557       | GO:000367 | Hs.518662 | ref:NM_0012HC267749  | ENST0000367511      |                |
| NM_00063  | 2.9261341 | 1.5489959 | 2.9261341 | up | -5.766083 | -2.527592 | 5.7660829 | down | 2359.4067 | 6903.9404 | 1197.3363 | ILKRA   | C.C.C.C - CKmerlekin_83577     | chr2      | +     | 218735812 | 218739961 | GO:000693  | GO:001602       | GO:000158 | Hs.194778 | ref:NM_0012HC246694  | ENST0000295843      |                |
| BC000213  | 2.9422234 | 1.5569068 | 2.9422234 | up | -2.369891 | -1.520996 | 2.3698914 | down | 639.61426 | 1878.582  | 654.5853  | KHLH2   | ABP_KHLH2-like_211275          | chr1      | +     | 3862125   |           |            |                 |           |           |                      |                     |                |

|                    |           |           |    |           |           |           |      |           |           |           |         |                              |       |   |           |           |                                         |                                     |
|--------------------|-----------|-----------|----|-----------|-----------|-----------|------|-----------|-----------|-----------|---------|------------------------------|-------|---|-----------|-----------|-----------------------------------------|-------------------------------------|
| NM_177551.4.312451 | 2.1085081 | 4.312451  | up | -7.542601 | -2.915062 | 7.5426007 | down | 1228.3627 | 5297.254  | 702.31134 | GPR109A | HM74aHMG protein-cc338442    | chr12 | - | 121751792 | 121753857 | GO:000716:GO:001602:GO:000158:Gs.524812 | ref:NM_177THC246151ENST00000328880  |
| NM_006014.4064444  | 2.139615  | 4.4064444 | up | -5.103446 | -2.351472 | 5.1034465 | down | 1524.9396 | 6719.5615 | 1316.6713 | GPR109B | HM74bPUNG protein-cc8843     | chr12 | - | 121765255 | 121767297 | GO:000716:GO:000588:GO:000158:Gs.458425 | ref:NM_006THC2461513                |
| AF249277           | 4.5972298 | 2.207648  | up | -5.255012 | -2.393694 | 5.255012  | down | 493.6314  | 2269.337  | 431.8424  | MTHFS   | Hc119268 5,10-methen10588    | chr15 | - | 77978301  | 78003099  | GO:000939:GO:000582:GO:000028:Hs.459049 | ref:NM_006THC270724ENST00000258874  |
| AY234180           | 5.2228768 | 2.3848447 | up | -4.00758  | -2.002731 | 4.00758   | down | 307.69843 | 1607.071  | 401.00784 | BCL2A1  | BCL2L5BEBCL2-relate597       | chr15 | - | 78040464  | 78050524  | GO:000691:GO:000562:GO:000551:Gs.227817 | ref:NM_004THC247733ENST00000267953  |
| AB002384           | 5.3026741 | 2.4067201 | up | -3.630673 | -1.860237 | 3.630673  | down | 310.87164 | 1648.451  | 454.03455 | C6orf32 | D1PF40D1FChromosom9750       | chr6  | - | 24912491  | 25019174  | Hs.559459                               | gb:AB002384THC251509ENST00000378027 |
| BC010952           | 6.0329695 | 2.5928683 | up | -4.374521 | -2.129125 | 4.3745211 | down | 170.35841 | 1027.7671 | 234.04391 | PI3     | ESI1MGC13peptidase in15266   | chr20 | + | 43236956  | 43238595  | GO:000762:GO:000557:GO:000486:Hs.112341 | ref:NM_002THC246161ENST00000243924  |
| NM_00224.7.0276518 | 2.8130427 | 7.0276518 | up | -4.838379 | -2.274524 | 4.8383791 | down | 597.60175 | 4199.737  | 868.00494 | KCNJ15  | KIR1.3KIR potassium ir.3772  | chr21 | + | 38550533  | 38595618  | GO:000681:GO:000562:GO:000524:Hs.411299 | ref:NM_170THC247225ENST00000328656  |
| AF035947           | 7.5599764 | 2.9183817 | up | -2.435893 | -1.284451 | 2.4358926 | down | 632.5817  | 4782.3027 | 1963.265  | CISH    | CIS/CIS-1(G)cytokine ind1154 | chr3  | - | 50618924  | 50624196  | GO:000155:GO:000557:GO:000367:Hs.655334 | ref:NM_145THC246359ENST00000348721  |
| NM_145071.0.417097 | 3.3808814 | 10.417097 | up | -2.404833 | -1.265937 | 2.4048333 | down | 592.09125 | 6167.872  | 2564.7815 | CISH    | CIS/CIS-1(G)cytokine ind1154 | chr3  | - | 50618923  | 50624207  | GO:000155:GO:000557:GO:000367:Hs.655334 | ref:NM_145THC246359ENST00000348721  |
| AF132297           | 10.723215 | 3.4226657 | up | -2.769831 | -1.469798 | 2.7698314 | down | 541.4777  | 5806.382  | 2096.2944 | CISH    | CIS/CIS-1(G)cytokine ind1154 | chr3  | - | 50618950  | 50624207  | GO:000155:GO:000557:GO:000367:Hs.655334 | ref:NM_145THC246359ENST00000348721  |

| SEQ_ID              | Fold chang | Log Fold  | Absolute Fc | Regulation | Fold chang | Log Fold  | Absolute Fc | Regulation | [AE-1][nor] | [AE-3][nor] | [AE-10][no] | GENE_NAME                  | SYNONYM/DESCRIPTION      | NCBI_GENCHROM | STRAND   | START    | STOP                                    | GO biologi                             | GO cellular                        | GO molecu       | UniGene | Dbid | TIGRID | EnsemblID |  |
|---------------------|------------|-----------|-------------|------------|------------|-----------|-------------|------------|-------------|-------------|-------------|----------------------------|--------------------------|---------------|----------|----------|-----------------------------------------|----------------------------------------|------------------------------------|-----------------|---------|------|--------|-----------|--|
| Z15108              | 2.0241838  | 1.0173403 | 2.0241838   | up         | 2.7610363  | 1.4652099 | 2.7610363   | up         | 188.72653   | 382.01718   | 1054.7653   | PRKCZ                      | protein kin 5590         | chr1          | +        | 1971947  | 2106686                                 | GO:000646:GO:000562:GO:0000166:macuole | gb:AB0079:THC2527109               |                 |         |      |        |           |  |
| BC037798            | 2.0484133  | 1.0345068 | 2.0484133   | up         | 2.4251858  | 1.2780953 | 2.4251858   | up         | 634.3157    | 1299.3407   | 3151.1426   | CGI-38                     | brain specifi51673       | chr16         | -        | 65981214 | 65983350                                | Hs.534458                              | ref:NM_016NP211869                 | ENST00000290942 |         |      |        |           |  |
| NM_001033.2.103378  | 1.0727082  | 2.103378  | up          | 2.7931822  | 1.4819097  | 2.7931822 | up          | 334.29022  | 703.1387    | 1963.9945   | PRKCZ       | protein kin 5590           | chr1                     | +             | 1998945  | 2106694  | GO:000646:GO:000562:GO:0000166:macuole  | gb:AB0079:THC2527109                   |                                    |                 |         |      |        |           |  |
| NM_007168.2.1274717 | 1.0891399  | 2.1274717 | up          | 3.9825857  | 1.9937054  | 3.9825857 | up          | 111.4468   | 237.09991   | 944.2707    | ABCA8       | KIAA0822 ATP-bindin10351   | chr17                    | -             | 64375024 | 64463128 | GO:000681:GO:001602:GO:000016:Hs.58351  | ref:NM_007THC246363ENST00000269080     |                                    |                 |         |      |        |           |  |
| AK022468            | 2.2809985  | 1.1896655 | 2.2809985   | up         | 3.5298331  | 1.8196    | 3.5298331   | up         | 151.83627   | 346.3383    | 1222.5164   | SORBS1                     | CAPDKFZsorbin and S10580 | chr10         | -        | 97140403 | 97311120                                | GO:000681:GO:000172:GO:000377:Hs.38621 | gb:AK0224:THC247915ENST00000371227 |                 |         |      |        |           |  |
| NM_00640.2.2897658  | 1.1952     | 2.2897658 | up          | 2.1812388  | 1.1251477  | 2.1812388 | up          | 624.15515  | 1429.1691   | 3117.3591   | NEDD9       | CAS-L/CASneural precu4739  | chr6                     | -             | 11291518 | 11340887 | GO:000007:GO:000563:GO:000551:Hs.37982  | ref:NM_006THC246839ENST00000379446     |                                    |                 |         |      |        |           |  |
| NM_02303.2.2961893  | 1.1992416  | 2.2961893 | up          | 2.0889467  | 1.0627757  | 2.0889467 | up          | 156.49878  | 359.35083   | 750.66473   | FRY         | 13CDNA73 furry homol 10129 | chr13                    | +             | 31503436 | 31768771 | GO:000635:GO:001602:GO:000552:Hs.591225 | ref:NM_023THC256136ENST00000380250     |                                    |                 |         |      |        |           |  |
| NM_01673.3.0155165  | 1.5924051  | 3.0155165 | up          | 11.694855  | 3.5478021  | 11.694855 | up          | 352.9474   | 1064.3187   | 12447.053   | FOLR1       | FBP/FOLR1hol recept2348    | chr11                    | +             | 71578905 | 71584990 | GO:000689:GO:000562:GO:000487:Hs.73769  | ref:NM_016NP226704                     | ENST00000312293                    |                 |         |      |        |           |  |

**EnsemblID**

ENST00000330588  
ENST00000368406  
  
ENST00000297435  
ENST00000231751  
ENST0000052754  
ENST00000367816  
ENST00000307998  
ENST00000228916  
ENST00000380456  
ENST00000355906  
ENST00000368391  
ENST00000371711  
ENST00000308926  
ENST00000368391  
ENST00000299610

ENST00000261978  
ENST00000344550  
ENST00000357898  
ENST00000324256  
ENST00000375582

5  
ENST00000261037  
ENST00000357867  
ENST00000310044  
ENST00000262429

ENST00000317508  
ENST00000249842  
ENST00000254963  
ENST00000368391  
ENST00000347401  
ENST00000231751  
ENST00000368868  
ENST00000262865

7  
ENST00000361084  
ENST00000342280  
ENST00000326724  
ENST00000367816  
ENST00000368391  
ENST00000320786  
ENST00000297435  
ENST00000219821  
ENST00000310677  
ENST00000231751  
ENST00000368223  
ENST00000249842  
ENST00000348956  
ENST00000301187  
ENST00000272462

9  
ENST00000337576  
ENST00000347401  
ENST00000338844  
ENST00000312293  
ENST00000268605  
ENST00000301187  
ENST00000374100  
ENST00000297268  
ENST00000357665

9  
ENST00000264601  
ENST00000344616  
ENST00000264605  
ENST00000304636  
ENST00000368391  
ENST00000324873  
ENST00000341918

8  
ENST00000340958  
ENST00000340900  
ENST00000252900

ENST00000350219

**EnsemblID**

ENST00000229829  
ENST00000278207  
ENST00000319294  
ENST00000370597

5  
ENST00000341618  
ENST00000294984

ENST00000341618

ENST00000333837

ENST00000368041

ENST00000368041

ENST00000341618

ENST0000029064

ENST00000303992

ENST00000368041

ENST00000344720

ENST00000325680

ENST00000263707

ENST00000371514

Annotations

| STOP     | STRAND | GO biolog  | GO cellula | GO molecu        | UniGene    | Dbid               | TIGRID          | EnsemblID       |
|----------|--------|------------|------------|------------------|------------|--------------------|-----------------|-----------------|
| 2.16E+08 | -      | GO:00069   | GO:00055   | GO:00052         | Hs.203717  | ref:NM_05          | NP127642        | ENST00000357867 |
| 21777491 | +      | GO:00015   | GO:00160   | GO:00002         | Hs.75431   | ref:NM_00          | THC24671        | ENST00000374832 |
| 31337907 | -      |            |            |                  |            |                    |                 |                 |
| 74818404 | +      | GO:00063   | GO:00056   | GO:00037         | Hs.25647   | ref:NM_00          | THC25445        | ENST00000303562 |
| 46967662 | +      | GO:00071   | GO:00058   | GO:00485         | Hs.466814  | gb:BC005008        | gb:CB240801     |                 |
| 90096495 | -      | GO:00098   | GO:00055   | GO:00051         | Hs.156316  | ref:NM_00          | THC25224        | ENST00000052754 |
| 36938071 | -      | GO:00452   | GO:00058   | GO:00052         | Hs.654568  | ref:NM_00          | THC25532        | ENST00000361566 |
| 72548080 | +      | GO:00015   | GO:00056   | GO:00037         | Hs.508234  | ref:NM_00          | NP284958        | ENST00000377687 |
| 22847189 | +      | GO:00068   | GO:00057   | 6(extracell)     | Hs.467753  | ref:NM_17          | THC26777        | ENST00000374637 |
| 93652783 | +      | GO:00069   | GO:00057   | GO:00036         | Hs.532634  | ref:NM_00          | THC24736        | ENST00000298902 |
| 22838686 | +      | GO:00068   | GO:00056   | GO:00020(comple) | Hs.632379  | ref:NM_01          | THC26912        | ENST00000374642 |
| 54522973 | -      | GO:00002   | GO:00055   | GO:00042         | Hs.591033  | ref:NM_00          | THC24883        | ENST00000322569 |
| 42847743 | -      | GO:00018   | GO:00055   | GO:00084         | Hs.275775  | ref:NM_00          | THC24989        | ENST00000388827 |
| 19230746 | -      | GO:00071   | GO:00015   | GO:00036         | Hs.296049  | ref:NM_00          | NP121143        | ENST00000299610 |
| 20512677 | +      | GO:00015   | GO:00056   | GO:00001         | Hs.502876  | ref:NM_00          | THC26414        | ENST00000272233 |
| 70652454 | +      | GO:00065   | GO:00055   | GO:00042         | Hs.513711  | ref:NM_00          | THC26053        | ENST00000355906 |
| 2.16E+08 | -      | GO:00069   | GO:00055   | GO:00052         | Hs.203717  | ref:NM_05          | NP127642        | ENST00000357867 |
| 57138862 | +      | GO:00069   | GO:00055   | GO:00048         | Hs.384598  | ref:NM_00          | THC25833        | ENST00000278407 |
| 46967953 | +      | GO:00071   | GO:00058   | GO:00485         | Hs.466814  | gb:BC005008        | gb:CB240801     |                 |
| 57138902 | +      | GO:00069   | GO:00055   | GO:00048         | Hs.384598  | ref:NM_00          | THC25833        | ENST00000278407 |
| 6671660  | -      | GO:00017   | GO:00055   | GO:00048         | Hs.529053  | ref:NM_00          | THC24700        | ENST00000389151 |
| 31589028 | +      | GO:00071   | GO:00055   | GO:00036         | Hs.644633  | ref:NM_00          | THC25181        | ENST00000266085 |
| 21777489 | +      | GO:00015   | GO:00160   | GO:00002         | Hs.75431   | ref:NM_00          | THC24671        | ENST00000374832 |
| 22860714 | +      | GO:00068   | GO:00056   | GO:00020(comple) | Hs.8986    | ref:NM_00          | THC24669        | ENST00000314933 |
| 2.11E+08 | +      | GO:00063   | GO:00056   | GO:00036         | Hs.4607    | ref:NM_00          | NP120535        | ENST00000366987 |
| 85821978 | +      | GO:00015   | GO:00055   | GO:00055         | Hs.8867    | ref:NM_00          | NP077848        | ENST00000360431 |
| 1.89E+08 | -      | GO:00001   | GO:00056   | GO:00036         | Hs.478588  | ref:NM_13          | THC24665        | ENST00000232014 |
| 7136184  | -      | GO:00065   | GO:00055   | GO:00038         | Hs.524224  | ref:NM_00          | THC2498629      |                 |
| 64996190 | +      | GO:00071   | GO:00056   | GO:00055         | Hs.76206   | ref:NM_00          | NP146631        | ENST00000341529 |
| 95165289 | -      | GO:00069   | GO:00055   | GO:00037         | Hs.483454  | ref:NM_00          | THC25861        | ENST00000370206 |
| 1.32E+08 | -      | GO:00015   | GO:00055   | GO:00051         | Hs.591346  | ref:NM_00          | NP095144        | ENST00000367976 |
| 90100937 | -      | GO:00098   | GO:00055   | GO:00055         | Hs.156316  | ref:NM_00          | THC25224        | ENST00000052754 |
| 1.86E+08 | -      | GO:00066   | GO:00057   | GO:00002         | Hs.406678  | ref:NM_00          | THC25127        | ENST00000281455 |
| 2.16E+08 | -      | GO:00069   | GO:00055   | GO:00052         | Hs.203717  | ref:NM_05          | NP127642        | ENST00000357867 |
| 36938160 | -      | GO:00452   | GO:00058   | GO:00052         | Hs.654568  | ref:NM_00          | THC25532        | ENST00000361566 |
| 58816033 | -      | GO:00071   | GO:00058   | GO:00048         | Hs.23582   | ref:NM_00          | THC24688        | ENST00000371225 |
| 19231086 | -      | GO:00071   | GO:00015   | GO:00036         | Hs.296049  | ref:NM_00          | NP121143        | ENST00000299610 |
| 1.24E+08 | +      | GO:00015   | GO:00055   | GO:00042         | Hs.501280  | ref:NM_00          | NP10487         | ENST00000368984 |
| 12957867 | +      | GO:00071   | GO:00058   | GO:00048         | Hs.631733  | ref:NM_00          | NP120629        | ENST00000014914 |
| 20512682 | +      | GO:00015   | GO:00056   | GO:00001         | Hs.502876  | ref:NM_00          | THC26414        | ENST00000272233 |
| 35764692 | -      | GO:00064   | GO:00056   | GO:00037         | Hs.407190  | ref:NM_00          | THC27122        | ENST00000357266 |
| 1.72E+08 | -      | GO:0006470 | protein a  | GO:00047         | Hs.171695  | ref:NM_00          | THC25283        | ENST00000239223 |
| 36227114 | -      | GO:00071   | GO:00055   | GO:00038         | Hs.517033  | ref:NM_19          | THC2659478      |                 |
| 79752463 | +      | GO:00071   | GO:00057   | GO:00055         | Hs.480042  | ref:NM_00          | THC27707        | ENST00000264908 |
| 74818666 | +      | GO:00063   | GO:00056   | GO:00037         | Hs.25647   | ref:NM_00          | THC25445        | ENST00000303562 |
| 1.14E+08 | +      |            |            |                  |            |                    |                 |                 |
| 44375678 | +      | GO:00055   | GO:00052   | Hs.24601         |            | ref:NM_00          | THC25002        | ENST00000262722 |
| 50670276 | +      | GO:00007   | GO:00056   | GO:00037         | Hs.590958  | ref:NM_00          | THC25060        | ENST00000353609 |
| 1.08E+08 | -      | GO:00064   | GO:00057   | GO:0004872       | (receptor) | ens:ENST0000036900 | ENST00000369002 |                 |
| 65176610 | -      |            |            |                  |            |                    |                 |                 |
| 90096460 | -      | GO:00098   | GO:00055   | GO:00055         | Hs.156316  | ref:NM_00          | THC25224        | ENST00000052754 |
| 90096460 | -      | GO:00098   | GO:00055   | GO:00055         | Hs.156316  | ref:NM_00          | THC25224        | ENST00000052754 |
| 90096460 | -      | GO:00098   | GO:00055   | GO:00055         | Hs.156316  | ref:NM_00          | THC25224        | ENST00000052754 |
| 22847190 | +      | GO:00068   | GO:00057   | 6(extracell)     | Hs.467753  | ref:NM_17          | THC26777        | ENST00000374637 |
| 1.18E+08 | +      | GO:00071   | GO:00058   | GO:00048         | Hs.496646  | ref:NM_00          | THC24886        | ENST00000371666 |
| 72573179 | -      |            |            |                  |            |                    |                 |                 |
| 43922003 | +      |            |            |                  |            |                    |                 |                 |
| 36854135 | -      |            |            |                  |            |                    |                 |                 |

Hs.530443 ens:ENST0000033944 ENST00000339446

Annotations

| STOP | STRAND | GO biolog | GO cellula | GO molecu | UniGene | Dbid | TIGRID | EnsemblID |
|------|--------|-----------|------------|-----------|---------|------|--------|-----------|
|------|--------|-----------|------------|-----------|---------|------|--------|-----------|



74818404 + GO:000631 GO:00056:GO:00037:Hs.25647 ref:NM\_001THC25445 ENST00000303562  
93652783 + GO:00069:GO:00057:GO:00036:Hs.532634 ref:NM\_001THC24736 ENST00000298902  
85821978 + GO:00015:GO:00055:GO:00055:Hs.8867 ref:NM\_001NP077848 ENST00000360431  
1.32E+08 - GO:00015:GO:00055:GO:00051:Hs.591346 ref:NM\_001NP095144 ENST00000367976  
12957867 + GO:00071:GO:00058:GO:00048:Hs.631733 ref:NM\_001NP120629 ENST0000014914  
50670276 + GO:00007 GO:00056:GO:00037:Hs.590958 ref:NM\_001THC25060 ENST00000353609  
90096460 + GO:000981 GO:00055:GO:00051:Hs.156316 ref:NM\_001THC25224 ENST00000052754  
43922003 + Hs.530443 ens:ENST0000033944 ENST00000339446

| STOP     | STRAND | GO biol    | GO cellula | GO molec   | UniGene           | Dbid                | TIGRID              | EnsemblID          |                 |
|----------|--------|------------|------------|------------|-------------------|---------------------|---------------------|--------------------|-----------------|
| 24753732 | +      | GO:00056   | GO:00001   | Hs.417959  | ref:NM_03NP500953 | ENST00000335473     |                     |                    |                 |
| 99866461 | +      | GO:00068   | GO:00057   | GO:00052   | Hs.108268         | ref:NM_20THC26246   | ENST00000361529     |                    |                 |
| 60017660 | +      | GO:00069   | GO:00058   | GO:00048   | Hs.661219         | ref:NM_001NP365687  | ENST00000359085     |                    |                 |
| 287963   | +      | GO:00069   | GO:00058   | GO:00048   | Hs.512572         | ref:NM_01NP084034   | ENST00000291633     |                    |                 |
| 34703152 | -      | GO:00001   | GO:00057   | GO:00050   | Hs.693639         | ref:NM_03THC24731   | ENST00000262866     |                    |                 |
| 3340717  | +      | GO:00063   | GO:00056   | GO:00036   | Hs.99500          | ref:NM_02THC26016   | ENST00000270722     |                    |                 |
| 15999716 | +      | GO:00063   | GO:00078   | GO:00037   | Hs.25960          | ref:NM_001THC24782  | ENST00000281043     |                    |                 |
| 95413524 | +      | GO:00063   | GO:00056   | GO:00036   | Hs.437376         | ref:NM_013434       | ref:ENST00000295225 |                    |                 |
| 1.57E+08 | -      |            |            |            | Hs.666099         | ref:NM_13THC24723   | ENST00000302938     |                    |                 |
| 271823   | +      | GO:00069   | GO:00058   | GO:00048   | Hs.512572         | ref:NM_01NP084034   | ENST00000291633     |                    |                 |
| 271823   | +      | GO:00069   | GO:00058   | GO:00048   | Hs.512572         | ref:NM_01NP084034   | ENST00000291633     |                    |                 |
| 99761084 | +      |            |            |            | GO:00055          | Hs.500736           | ref:NM_01THC25030   | ENST00000370597    |                 |
| 70347484 | +      |            |            |            | GO:001602         | (membrar            | Hs.370262           | gb:AK0001THC24752  | ENST00000335464 |
| 22023120 | -      |            |            |            |                   |                     |                     |                    |                 |
| 1872817  | +      | GO:00150   | GO:001602  | (membrar   | Hs.144980         | gb:AK0741THC2482725 |                     |                    |                 |
| 20406034 | +      | GO:0008152 | (metaboli  | GO:00038   | Hs.298252         | ref:NM_001THC24745  | ENST00000329697     |                    |                 |
| 59728199 | -      |            |            |            |                   |                     |                     |                    |                 |
| 54438334 | -      |            |            |            |                   |                     |                     |                    |                 |
| 11252804 | -      |            |            |            |                   |                     |                     |                    |                 |
| 1.36E+08 | -      |            |            |            |                   |                     |                     |                    |                 |
| 77568569 | +      |            |            |            |                   |                     |                     |                    |                 |
| 87328126 | -      |            |            |            |                   |                     |                     |                    |                 |
| 52074168 | -      |            |            |            |                   |                     |                     |                    |                 |
| 64562088 | -      |            |            |            |                   |                     |                     |                    |                 |
| 1.46E+08 | -      |            |            |            |                   |                     |                     |                    |                 |
| 14789544 | +      |            |            |            | GO:0005737        | (cytoplasi          | Hs.661452           | ref:NM_03THC24911  | ENST00000253697 |
| 49485509 | +      | GO:00068   | GO:0005737 | (cytoplasi | Hs.526441         | ref:NM_18THC2605336 |                     |                    |                 |
| 19998424 | -      |            |            |            |                   |                     |                     |                    |                 |
| 98211660 | +      | GO:00064   | GO:00160   | GO:00001   | Hs.653244         | gb:AL1336THC2612465 |                     |                    |                 |
| 60070260 | +      | GO:00069   | GO:00058   | GO:00048   | Hs.645228         | ref:NM_01THC24706   | ENST00000326321     |                    |                 |
| 35273967 | -      |            |            |            | GO:00056          | GO:00036            | Hs.444388           | ref:NM_01NP124156  | ENST00000293068 |
| 35273967 | -      |            |            |            | GO:00056          | GO:00036            | Hs.444388           | ref:NM_01NP124156  | ENST00000293068 |
| 27180439 | -      | GO:00063   | GO:00056   | GO:00037   | Hs.592166         | ref:NM_01NP140032   | ENST00000283921     |                    |                 |
| 31231446 | -      | GO:00068   | GO:00055   | GO:00048   | Hs.514821         | ref:NM_001THC24650  | ENST00000293272     |                    |                 |
| 18592843 | +      |            |            |            | GO:0005624        | (membrar            | Hs.329850           | ref:NM_01THC24614  | ENST00000262817 |
| 38654183 | +      | GO:0006396 | (RNA pre   | GO:00037   | Hs.173311         | ref:NM_15THC24633   | ENST00000315616     |                    |                 |
| 1.3E+08  | -      |            |            |            | Hs.373606         | ref:NM_19THC24918   | ENST00000373078     |                    |                 |
| 34513027 | -      |            |            |            | Hs.522088         | ref:NM_19THC26145   | ENST00000303992     |                    |                 |
| 1.61E+08 | -      | GO:00072   | GO:00055   | GO:00036   | Hs.350581         | ref:NM_05THC24879   | ENST00000367929     |                    |                 |
| 54786072 | +      |            |            |            | GO:00055          | GO:00051            | Hs.35101            | ref:NM_001THC24742 | ENST00000246794 |
| 1.49E+08 | -      |            |            |            |                   |                     | Hs.652227           | ref:NM_001THC26012 | ENST00000378008 |
| 34026289 | +      |            |            |            |                   |                     |                     |                    |                 |
| 54244175 | +      |            |            |            |                   |                     |                     |                    |                 |
| 59956315 | +      |            |            |            |                   |                     |                     |                    |                 |
| 6193546  | +      |            |            |            |                   |                     |                     |                    |                 |
| 1.02E+08 | -      |            |            |            |                   |                     |                     |                    |                 |
| 22090936 | +      |            |            |            |                   |                     |                     |                    |                 |
| 39905106 | +      |            |            |            | Hs.693637         | ref:NM_01THC2491244 |                     |                    |                 |
| 99340678 | +      |            |            |            | Hs.662302         | ref:NM_001THC26375  | ENST00000370640     |                    |                 |
| 1.34E+08 | +      | GO:00063   | GO:00056   | GO:00036   | Hs.573153         | ref:NM_001THC24965  | ENST00000342854     |                    |                 |
| 86827305 | +      | GO:00069   | GO:00057   | GO:00084   | Hs.125039         | ref:NM_02THC24728   | ENST00000331536     |                    |                 |
| 1.77E+08 | +      |            |            |            | GO:0005737        | (cytoplasi          | Hs.101761           | ref:NM_01THC24757  | ENST00000274605 |
| 44175498 | +      | GO:00071   | GO:00056   | GO:00080   | Hs.632404         | ref:NM_05THC26629   | ENST00000372354     |                    |                 |
| 1.61E+08 | -      | GO:00072   | GO:00055   | GO:00036   | Hs.350581         | ref:NM_05THC24879   | ENST00000367929     |                    |                 |
| 21950353 | +      | GO:00063   | GO:00078   | GO:00036   | Hs.131055         | ref:NM_18NP800281   |                     |                    |                 |
| 42740413 | +      |            |            |            | GO:0005634        | (nucleus)           | Hs.473912           | ref:NM_01THC24754  | ENST00000319294 |
| 39094454 | +      | GO:00063   | GO:00055   | GO:00036   | Hs.438            | ref:NM_001THC24720  | ENST00000318579     |                    |                 |
| 22090933 | +      | GO:00069   | GO:00058   | GO:00048   | Hs.74647          | gb:BC0633NP1155360  |                     |                    |                 |
| 1.42E+08 | +      |            |            |            |                   |                     |                     |                    |                 |
| 1.42E+08 | +      |            |            |            |                   |                     |                     |                    |                 |
| 1.42E+08 | +      |            |            |            |                   |                     |                     |                    |                 |
| 2811625  | +      | GO:00065   | GO:00056   | GO:00042   | Hs.72026          | ref:NM_001THC24754  | ENST0000005995      |                    |                 |
| 42169399 | +      |            |            |            | GO:00055          | Hs.501114           | gb:BC0938NP1164839  |                    |                 |
| 38502423 | +      | GO:00081   | GO:00055   | GO:00036   | Hs.147695         | ref:NM_14THC24843   | ENST00000348862     |                    |                 |
| 1.2E+08  | -      | GO:00071   | GO:00058   | GO:00015   | Hs.248119         | ref:NM_001THC24797  | ENST00000239032     |                    |                 |
| 226904   | +      | GO:00069   | GO:00058   | GO:00048   | Hs.645228         | ref:NM_01THC24706   | ENST00000326321     |                    |                 |

1.13E+08 + GO:00069:GO:00055:GO:00051:Gs.211238 ref:NM\_01.NP861722 ENST00000259205  
5436786 - GO:00070:GO:00058:GO:00001:Gs.163079 ref:NM\_02.THC24788 ENST00000380419  
226904 + GO:00069:GO:00058:GO:00048:Gs.645228 ref:NM\_01.THC24706 ENST00000326321  
22090933 + GO:00069:GO:00058:GO:00048:Gs.74647 gb:BC0633NP1155360  
86942549 - GO:00069:GO:00058:GO:00051:Gs.405667 ref:NM\_17.THC24908 ENST00000337868  
69336254 - Gs.464079 ref:NM\_18.NP146566 ENST00000321800  
629117 - GO:00015:GO:00017:GO:00001:Gs.498570 ref:NM\_00.THC24717 ENST00000263125  
75113344 - GO:00069:GO:00056:GO:00048:Gs.24640 ref:NM\_00.THC24663 ENST00000261918  
1.14E+08 - GO:00069:GO:00055:GO:00051:Gs.278909 ref:NM\_17.THC24838 ENST00000327407  
60051298 + GO:00058:GO:00048:Gs.654608 ref:NM\_01.THC27529 ENST00000291633  
21173793 + GO:00000:GO:00056:GO:00080:Gs.111 ref:NM\_00.THC24806 ENST00000382353  
60070101 + GO:00069:GO:00058:GO:00048:Gs.645228 ref:NM\_00.THC24706 ENST00000326321  
288060 + GO:00069:GO:00058:GO:00048:Gs.512572 ref:NM\_01.NP084034 ENST00000291633  
85517555 + GO:0007242:(intracellular signal)Gs.209542 gb:BC110C.NP145707:ENST00000389938  
22090936 + GO:00069:GO:00058:GO:00048:Gs.74647 gb:BC0633NP1155360  
41219170 + GO:00076:GO:00055:GO:00036:Gs.302019 ref:NM\_02.THC24846 ENST00000378220  
3326560 + GO:00056:GO:00055:Gs.155995 ref:NM\_02.THC249436  
288306 + GO:00069:GO:00058:GO:00048:Gs.512572 ref:NM\_01.NP084034 ENST00000291633  
272126 + GO:00069:GO:00058:GO:00048:Gs.512572 ref:NM\_01.NP084034 ENST00000291633  
56648364 + GO:0006487:(protein a)GO:00048:Gs.654472 ref:NM\_00.THC24729 ENST00000299022  
17865897 + GO:00068 GO:00160:GO:00052:Gs.584804 ref:NM\_00.THC24826 ENST0000022248  
48638931 + GO:00068 GO:00056:GO:00052:Gs.130730 ref:NM\_00.THC24784 ENST00000199280  
25244956 + GO:00069:GO:00055:GO:00051:Gs.1897 ref:NM\_00.THC24810 ENST00000264708  
1.05E+08 - GO:0016020:(membran)Gs.680365 ref:NM\_00.THC24851 ENST00000329905  
8565237 +  
1.58E+08 +  
1.06E+08 +  
2.46E+08 +  
1.3E+08 + GO:00068:GO:00058:GO:00001:Gs.522413 ref:NM\_00.THC24938 ENST00000341179  
62186156 - Gs.570316 ref:NM\_00.THC24855 ENST00000308906  
38414444 - GO:00015:GO:00055:GO:00055:Gs.349705 ref:NM\_00.THC24798 ENST00000377694  
1.49E+08 - Gs.652227 ref:NM\_00.THC26012 ENST00000378008  
1.64E+08 - GO:00063:GO:00056:GO:00037:Gs.26550 ref:NM\_00.THC26061 ENST00000367892  
1766240 + Gs.7247 gb:AK074(THC2504155  
3059669 + GO:00069:GO:00056:GO:00051:Gs.943 ref:NM\_00.THC25889 ENST00000008180  
51109876 - Gs.646574 ref:NM\_00.THC24759 ENST00000321691  
53976682 - GO:00071:GO:00058:GO:00048:Gs.462529 ref:NM\_14.NP114549:ENST00000356876  
6448842 +  
37617144 +  
1.42E+08 +  
1.17E+08 + GO:00017:GO:00058:GO:00048:Gs.523500 ref:NM\_00.THC24719 ENST00000369478  
86871578 - GO:00069:GO:00058:GO:00055:Gs.85258 ref:NM\_00.THC24680 ENST00000283635  
27252717 + GO:00063:GO:00056:GO:00037:Gs.369879 ref:NM\_00.THC24849 ENST00000222761  
54365717 + GO:00065:GO:00057:GO:00042:Gs.277937 ref:NM\_00.THC24765 ENST00000231009  
60017783 + GO:00069:GO:00058:GO:00048:Gs.661219 ref:NM\_00.NP365687 ENST00000359085  
3752810 + GO:00000:GO:00056:GO:00001:Gs.631845 ref:NM\_13.THC27825 ENST00000310132  
1.34E+08 + GO:00063:GO:00056:GO:00036:Gs.573153 ref:NM\_00.THC24965 ENST00000342854  
1.14E+08 - GO:00063:GO:00056:GO:00037:Gs.469728 ref:NM\_01.NP207698 ENST00000348715  
1.44E+08 - GO:00071:GO:00056:GO:00055:Gs.415762 ref:NM\_00.THC24736 ENST00000301263  
1.74E+08 - GO:00071:GO:00058:GO:00015:Gs.248115 ref:NM\_00.THC26039 ENST00000241256  
19716846 - GO:00065:GO:00160:GO:00151:Gs.197116 ref:NM\_00.THC24751 ENST00000382932  
1.02E+08 - GO:00002:GO:00055:GO:00042:Gs.591946 ref:NM\_00.THC26655 ENST00000260228  
41426593 + GO:00069:GO:00058:GO:00048:Gs.194721 ref:NM\_00.THC24879 ENST00000373089  
29290876 + GO:00064:GO:00056:GO:00017:Gs.17958 ref:NM\_00.THC24717 ENST00000338911  
86942549 - GO:00069:GO:00058:GO:00055:Gs.405667 ref:NM\_17.THC24908 ENST00000337868  
1.01E+08 - GO:00063:GO:00056:GO:00037:Gs.520293 ref:NM\_00.THC24793 ENST00000262901  
5558225 + GO:00056:GO:00056:Gs.239600 ref:NM\_00.THC24726 ENST00000315238  
31347222 - GO:00061 GO:00057:GO:00041:Gs.250760 ref:NM\_005205:gb:BC029818  
27738789 - GO:00018:GO:00056:GO:00037:Gs.591663 ref:NM\_00.THC2631102  
9054610 + GO:00069:GO:00160:GO:00048:Gs.558446 ref:NM\_00.NP387863 ENST00000356986  
1E+08 + GO:00081:GO:00055:GO:00036:Gs.521083 ref:NM\_00.THC24727 ENST00000300176  
85779380 + GO:00068:GO:00056:Gs.105806 ref:NM\_00.THC26417 ENST00000263863  
10359227 + GO:00071:GO:00058:GO:00048:Gs.562457 ref:NM\_00.NP492171 ENST00000336164  
288431 + GO:00069:GO:00058:GO:00048:Gs.512572 ref:NM\_01.NP084034 ENST00000291633  
253356 +  
60051836 + GO:00058:GO:00048:Gs.654608 ref:NM\_01.THC27529 ENST00000291633  
1.09E+08 + Gs.436618 ref:NM\_01.THC27877 ENST00000389626  
49229100 + GO:00063:GO:00056:GO:00036:Gs.279840 ref:NM\_01.THC26374 ENST00000187879  
1.02E+08 -  
60651900 + GO:00080:GO:00058:GO:00050:Gs.58685 ref:NM\_01.THC2463150  
59987590 +  
37569963 - GO:00160:GO:00048:Gs.91622 ref:NM\_01.THC25010 ENST00000333039  
40899780 + GO:00001:GO:00056:GO:00036:Gs.99430 ref:NM\_01.THC27609 ENST00000262630  
59956316 +  
271801 + GO:00069:GO:00160:GO:00048:Gs.661101 ref:NM\_01.NP083697 ENST00000291633  
52735630 + GO:00063:GO:00056:GO:00037:Gs.549040 ref:NM\_01.THC24745 ENST00000303406  
150755 + GO:00056:GO:00050:Gs.536319 gb:BC0247NP437544 ENST00000326643

3710061 - GO:00081;GO:00055;GO:00036;Hs.72620 ref:NM\_01 THC24889 ENST00000356899  
54873005 + GO:00066;GO:00057;GO:00047;Hs.234786 ref:NM\_01 THC27076 ENST00000343744  
37024476 - GO:00063;GO:00056;GO:00036;Hs.654464 ref:NM\_01 THC24781 ENST00000377859  
1.12E+08 + GO:00068;GO:00160;GO:00052;Hs.591327 ref:NM\_01 THC24733 ENST00000368851  
68945808 - GO:00071;GO:00160;GO:00055;Hs.435719 gb:BC0663 THC2605019  
40467886 + GO:00068;GO:00055;GO:00051;Hs.8821 ref:NM\_02 THC24780 ENST00000222304  
1.75E+08 + GO:00015;GO:00056;GO:00082;Hs.187284 gb:AF3429 THC2490052  
8581588 - GO:00065;GO:00055;GO:00036;Hs.657508 ref:NM\_03 THC24643 ENST00000270328  
15573926 - GO:00198;Hs.98785 ref:NM\_03 THC24739 ENST00000382324  
34707972 - GO:00001;GO:00057;GO:00050;Hs.693639 ref:NM\_03 THC24731 ENST00000262866  
604823 - GO:00063;GO:00056;GO:00036;Hs.355284 ref:NM\_03 THC24776 ENST00000246104  
190258 + Hs.350949 ref:NM\_05 THC24833 ENST00000352113  
51173240 -  
27985586 + GO:00068;GO:00055;GO:00055;Hs.289106 ref:NM\_13 NP402577 ENST00000334018  
99362549 + GO:00081;GO:00057;GO:00168;Hs.180346 ref:NM\_13 THC24750 ENST00000370646  
1.17E+08 + GO:0008033(RNA pr GO:00047;Hs.21187 ref:NM\_13 NP116008 ENST00000298746  
46727205 + GO:00076;GO:001602(membran Hs.185777 ref:NM\_14 THC24802 ENST00000326431  
6448842 - GO:00071;GO:00058;GO:00048;Hs.462529 ref:NM\_14 NP114549 ENST00000356876  
18682886 + Hs.406913 ref:NM\_15 THC24850 ENST00000325337  
21886369 - GO:00055;Hs.448572 ref:NM\_15 THC24789 ENST00000379499  
45025964 - GO:00068;GO:00160;GO:00036;Hs.302513 ref:NM\_15 THC24886 ENST00000372207  
12607686 + GO:00063;GO:00056;GO:00036;Hs.567641 ref:NM\_15 NP540184 ENST00000343344  
1.88E+08 + GO:00512;GO:000986(cell surf Hs.518480 ref:NM\_15 NP541910 ENST00000382104  
44331749 - GO:0006468(protein a GO:00001;Hs.351887 ref:NM\_17 NP118865 ENST00000347193  
86942549 - GO:00069;GO:00058;GO:00055;Hs.405667 ref:NM\_17 THC24908 ENST00000337868  
86942549 - GO:00069;GO:00058;GO:00055;Hs.405667 ref:NM\_17 THC24908 ENST00000337868  
1.5E+08 - GO:000045(autophagic vacuole Hs.655505 ref:NM\_17 THC25198 ENST00000312968  
1.16E+08 + Hs.421750 ref:NM\_17 NP116530 ENST00000314309  
7041235 + Hs.352515 ref:NM\_17 NP115692 ENST00000314227  
1068674 - Hs.250557 gb:AK0568 THC2478752  
52907943 + Hs.424589 gb:AK128;THC2485408  
1299303 + GO:00068;GO:00058;GO:00052;Hs.213284 ref:NM\_18 NP398860 ENST00000324642  
1097350 - GO:00055;Hs.248290 ref:NM\_19 NP146562 ENST00000319237  
2.46E+08 - GO:00071;GO:00160;GO:00048;Hs.23491 ref:NM\_19 THC24845 ENST00000366487  
85517663 + GO:0007242(intracellular signalin Hs.209542 gb:BC110CNP145707;ENST00000389938  
7703008 - GO:00160;GO:00055;Hs.220649 ref:NM\_19 THC24791 ENST00000328853  
34513037 - Hs.522085 ref:NM\_19 THC26145 ENST00000303992  
1.54E+08 + GO:00071;GO:00055;GO:00055;Hs.654541 ref:NM\_19 THC24840 ENST00000368272  
94983040 + GO:00071;GO:00160;GO:00015;Hs.143315 ref:NM\_19 THC26031 ENST00000316122  
1.34E+08 + GO:00063;GO:00056;GO:00036;Hs.573153 ref:NM\_00 THC24965 ENST00000342854  
5631911 - GO:00055;Hs.356626 ref:NM\_20 THC24966 ENST00000309324  
1.43E+08 - Hs.689547 ref:NM\_20 THC2480285  
48144348 -  
60034044 + GO:00069;GO:00058;GO:00048;Hs.645228 ref:NM\_01 THC24706 ENST00000262621  
60543369 + GO:00069;GO:00058;GO:00050;Hs.643167 ref:NM\_00 NP091718 ENST00000313421  
60017780 + GO:00069;GO:00058;GO:00048;Hs.661219 ref:NM\_00 NP365687 ENST00000359085  
84961721 -  
1.18E+08 +  
1.55E+08 +  
77498394 - GO:0016020(membran Hs.163451 ens:ENSTU THC26147 ENST00000330655  
38693156 - Hs.144075 gb:AK124;THC27852 ENST00000381390  
5620855 +  
1.45E+08 -  
1.79E+08 +  
47302669 +  
6483835 -  
88256899 -  
1876799 -  
1.76E+08 +  
39974822 +  
18761119 + Hs.632006 ref:NM\_02 THC2463453  
293088 +  
75242880 -  
5892515 +  
68038530 -  
1.52E+08 -  
35204356 +  
1.51E+08 -  
45398263 -  
1.05E+08 -  
1.12E+08 -  
48997409 -  
19948283 +  
71629939 -  
1.65E+08 -  
4790447 + Hs.558440 ens:ENSTU THC26344 ENST00000348624  
63293870 +

54689234 -  
 11439761 - GO:000711 GO:00055 GO:00015 Hs.654486 ref:NM\_006248;gb:K03208;gb:BC044827  
 65474181 -  
 18207722 +  
 71448618 - Hs.514494 ref:NM\_0017389  
 69030324 -  
 56189478 +  
 75659546 +  
 17924078 -  
 21853153 +  
 33807542 +  
 22485140 +  
 13210359 -  
 2.22E+08 -  
 1.48E+08 +  
 1.27E+08 +  
 53290507 - Hs.483519 ref:NR\_001988;Hs.98785 ref:NM\_03153  
 60017389 + GO:00069 GO:00058 GO:00048 Hs.661219 ref:NM\_0017389

| Annotations |        |           |            |          |           |           |                          |                          |
|-------------|--------|-----------|------------|----------|-----------|-----------|--------------------------|--------------------------|
| STOP        | STRAND | GO biolog | GO cellula | GO molec | UniGene   | Dbid      | TIGRID EnsemblID         |                          |
| 271823      | +      | GO:00069  | GO:00058   | GO:00048 | Hs.512572 | ref:NM_01 | NP084034 ENST00000291633 |                          |
| 1.61E+08    | -      | GO:00072  | GO:00055   | GO:00036 | Hs.350581 | ref:NM_05 | THC24879 ENST00000367929 |                          |
| 1.61E+08    | -      | GO:00072  | GO:00055   | GO:00036 | Hs.350581 | ref:NM_05 | THC24879 ENST00000367929 |                          |
| 86942549    | -      | GO:00069  | GO:00058   | GO:00055 | Hs.405667 | ref:NM_17 | THC24908 ENST00000337868 |                          |
| 2.46E+08    | +      |           |            |          |           |           |                          |                          |
| 86942549    | -      | GO:00069  | GO:00058   | GO:00055 | Hs.405667 | ref:NM_17 | THC24908 ENST00000337868 |                          |
| 15573926    | -      |           |            |          | GO:00198  | Hs.98785  | ref:NM_03                | THC24739 ENST00000382324 |
| 1.34E+08    | +      | GO:00063  | GO:00056   | GO:00036 | Hs.573153 | ref:NM_00 | THC24965 ENST00000342854 |                          |

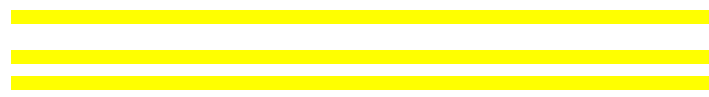

Supplement: 13054_2014_508_MOESM4_ESM.pdf [file 13054_2014_508_MOESM4_ESM.pdf]
