# Supplementary material for: Dynamic gene expressions of peripheral blood mononuclear cells in patients with acute exacerbation of chronic obstructive pulmonary disease: a preliminary study
Source: PubMed Central journal article supplement (PMC4305227; doi:10.1186/s13054-014-0508-y), 2014-11-19
Supplement: 13054_2014_508_MOESM2_ESM.pdf [file 13054_2014_508_MOESM2_ESM.pdf]

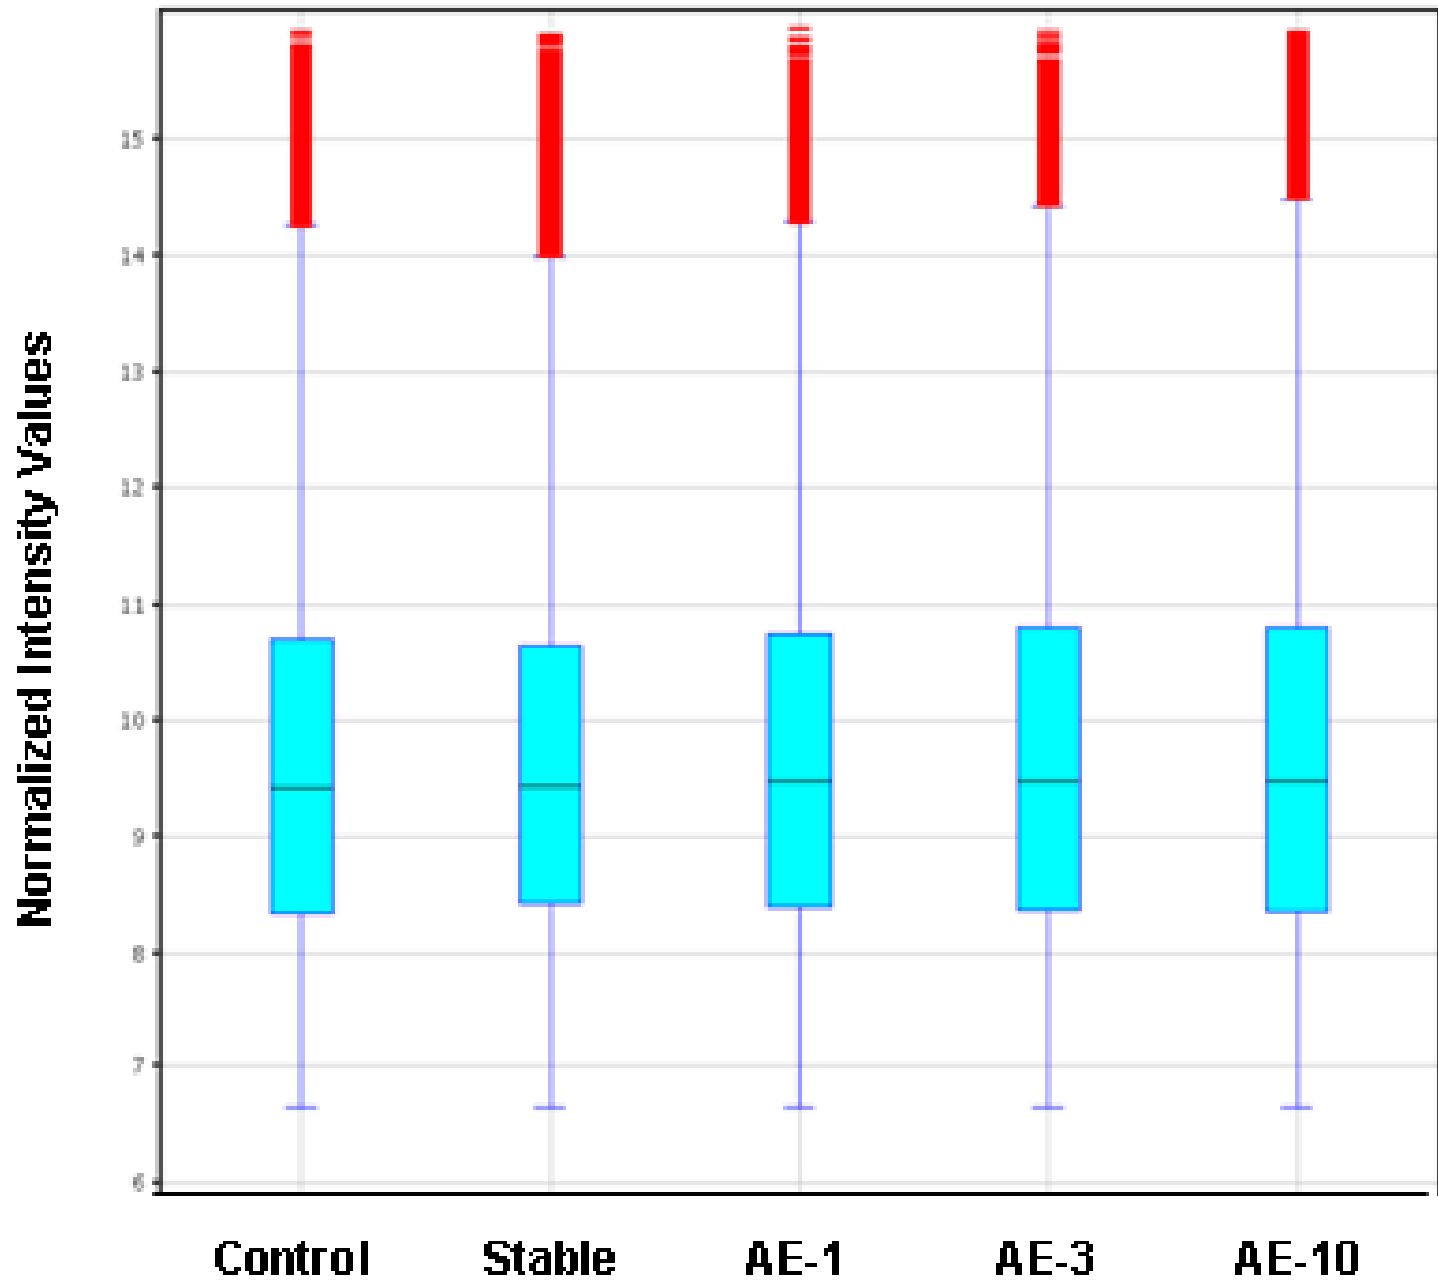

Suppl.  
Figure 1

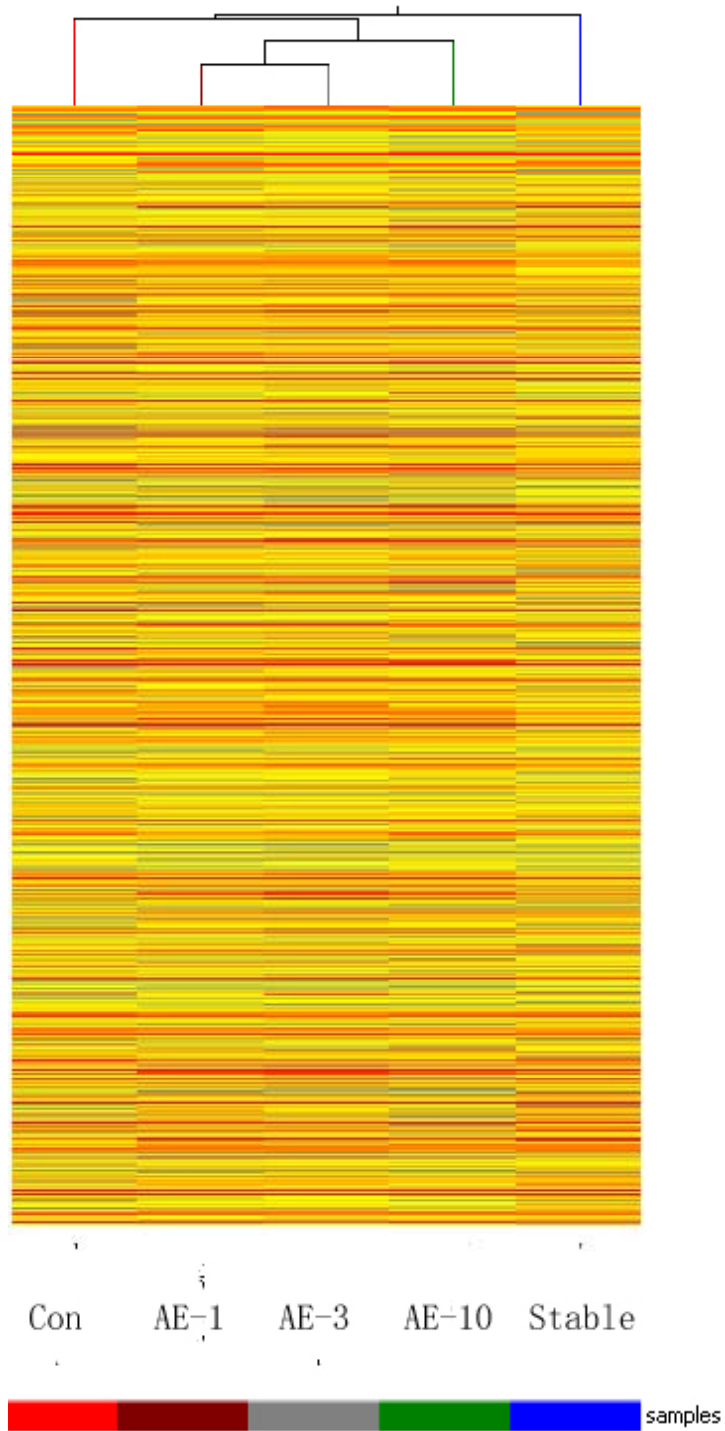

**Suppl.  
Figure 2**

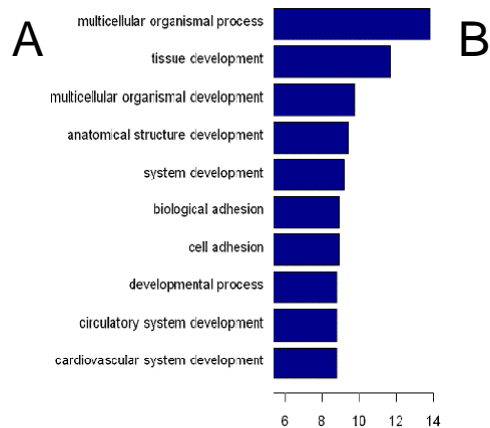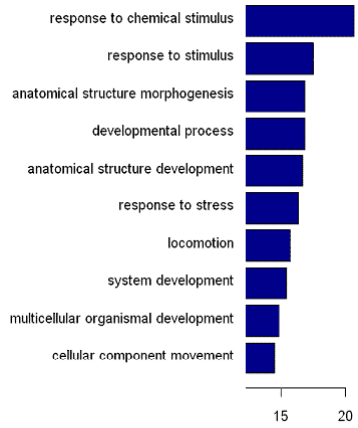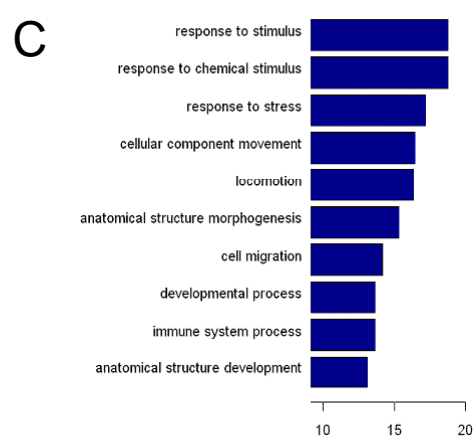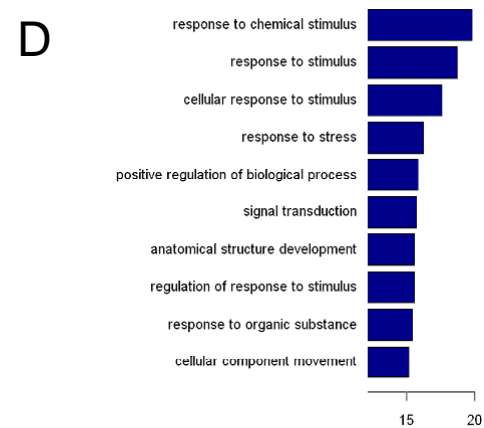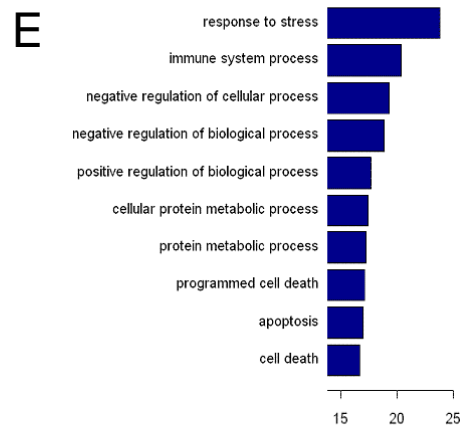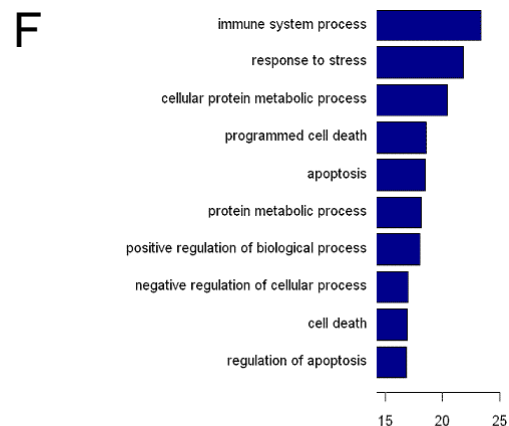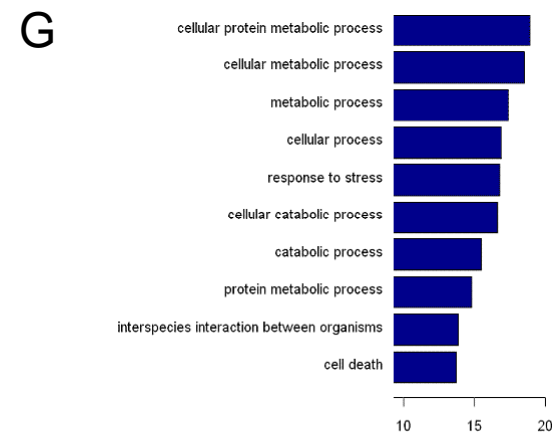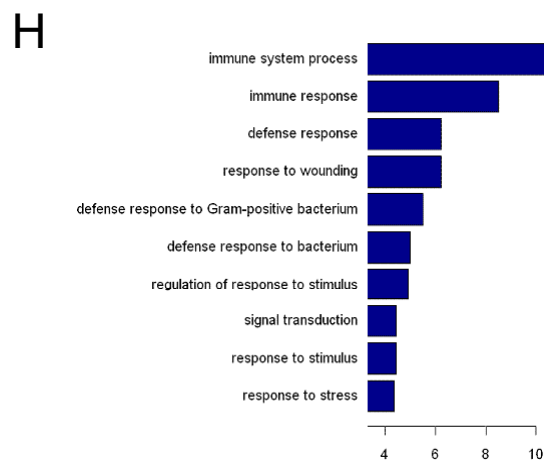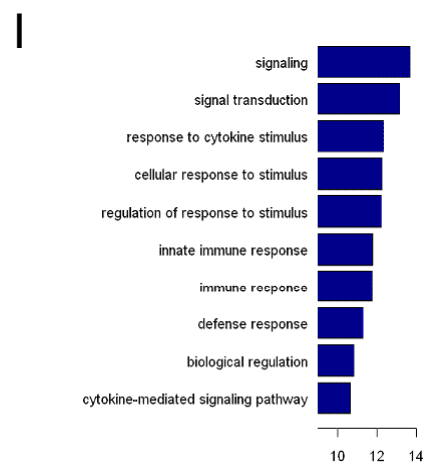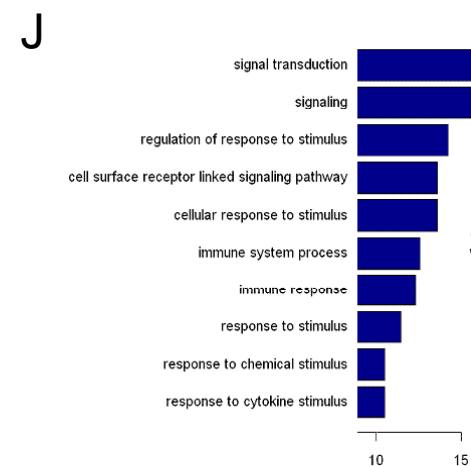

**Suppl.  
Figure 3  
BP-up**

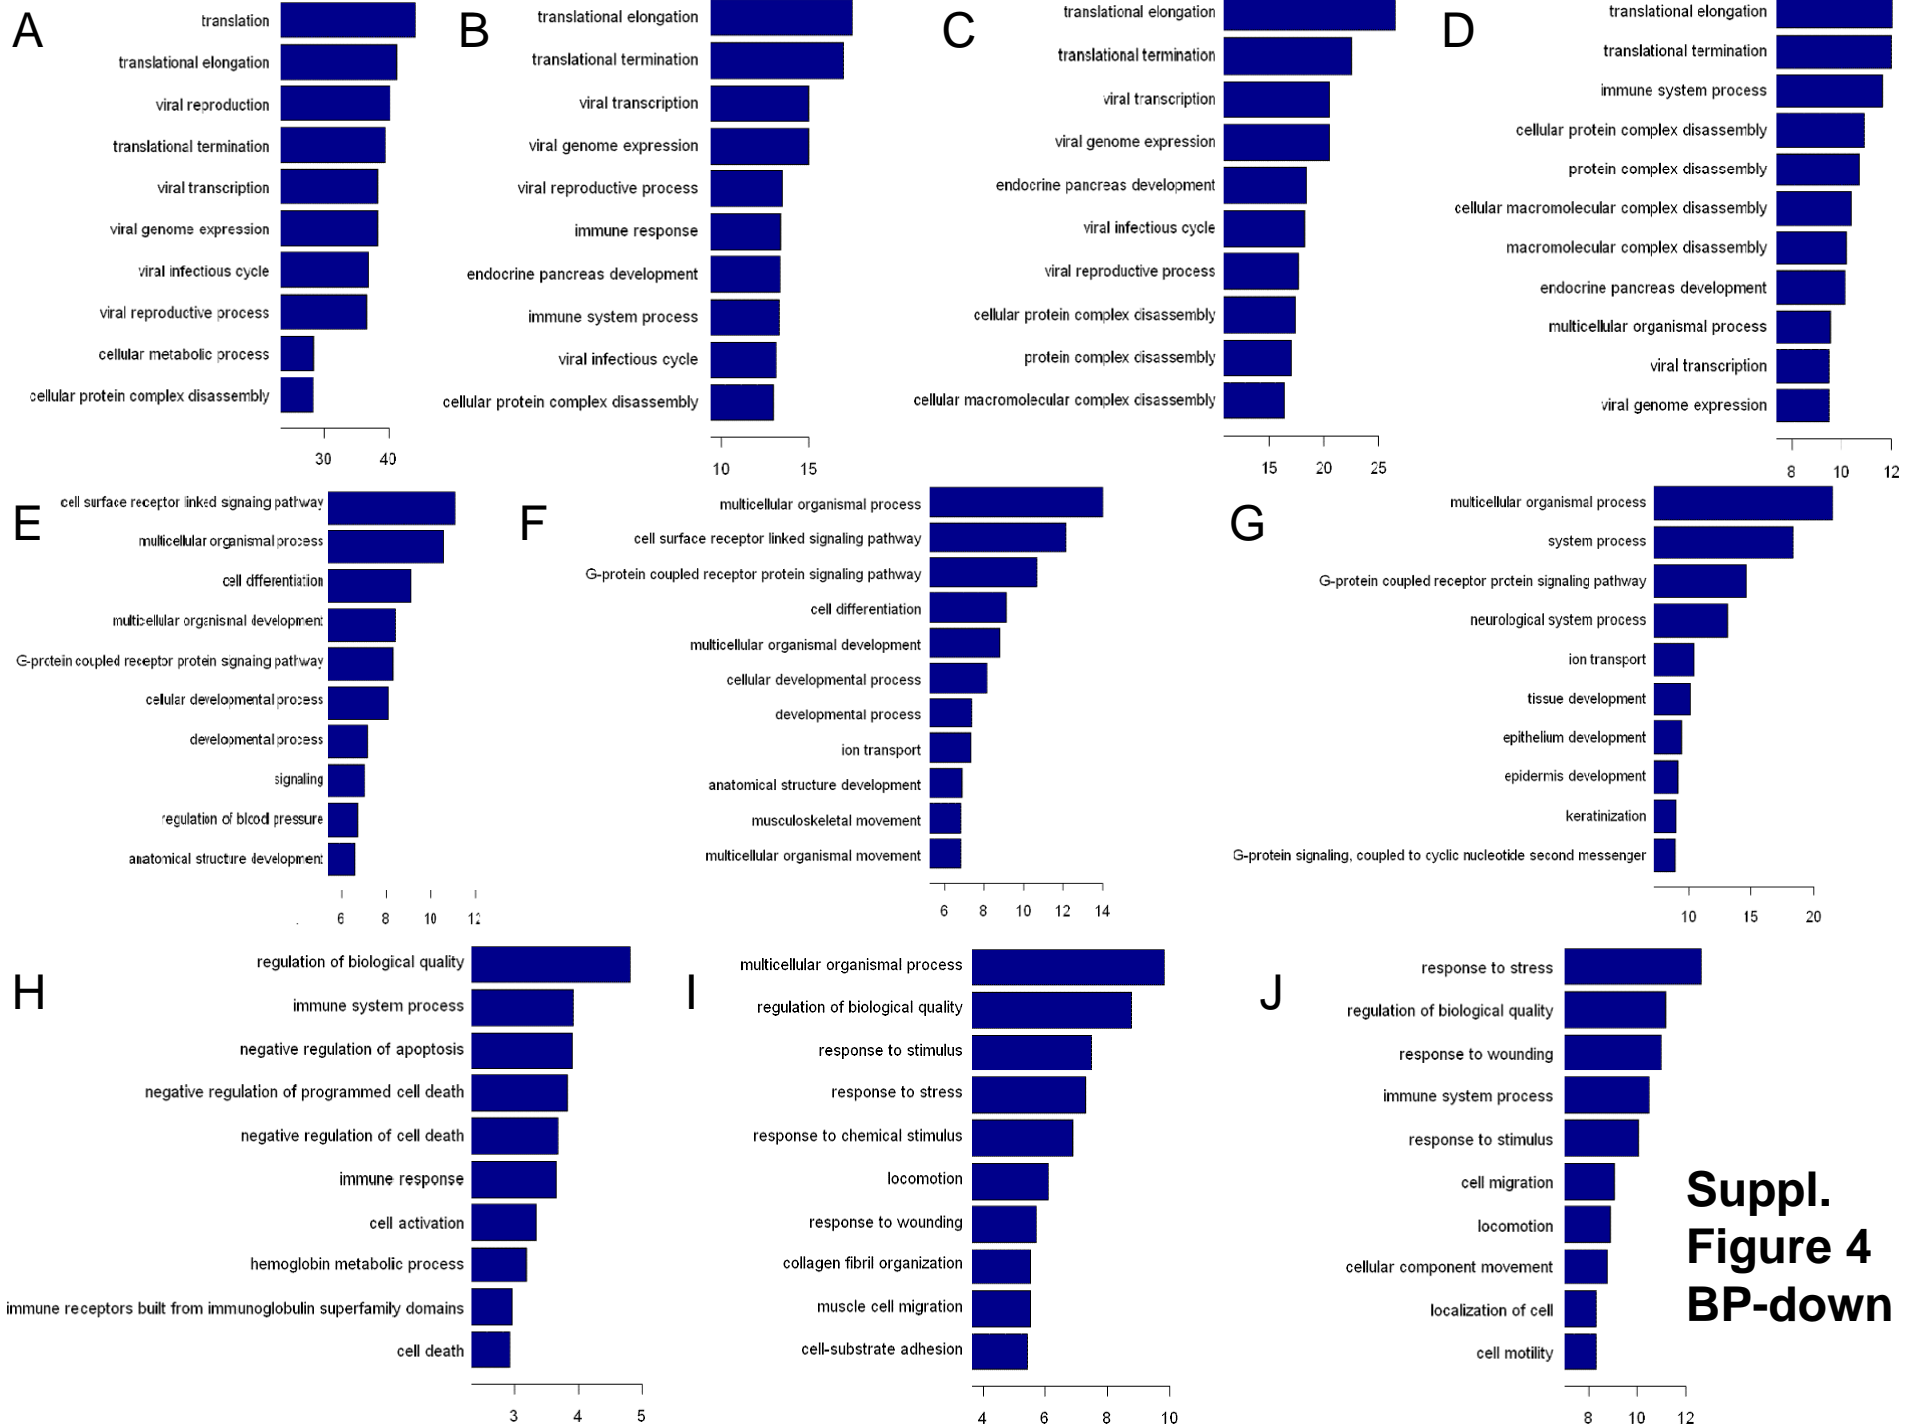

**Suppl.  
Figure 4  
BP-down**

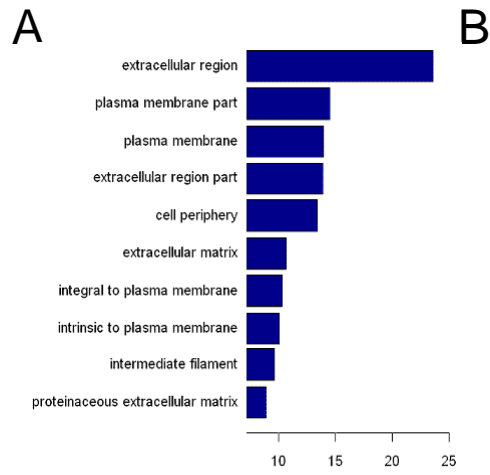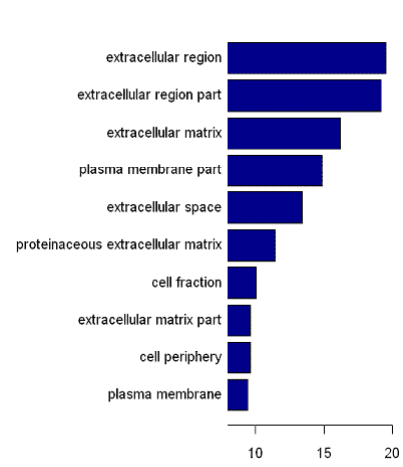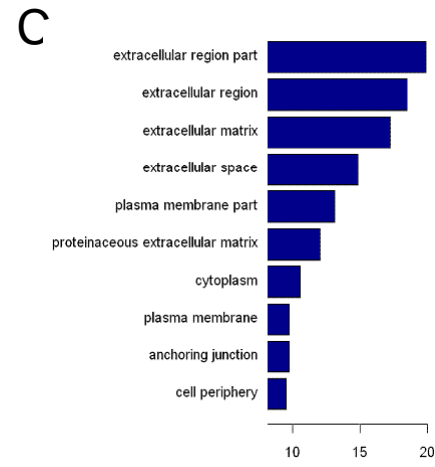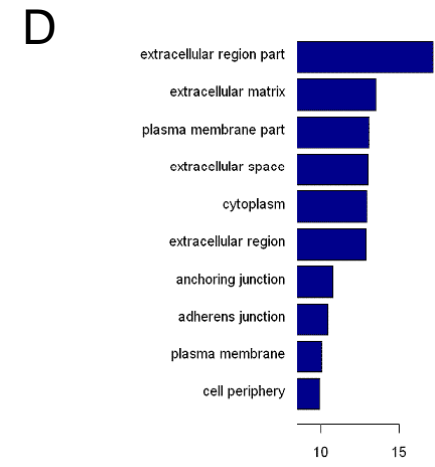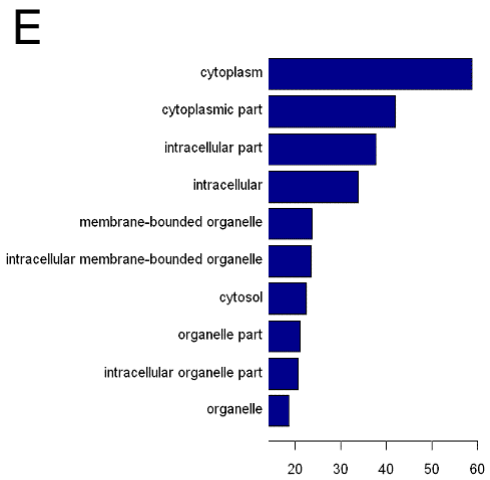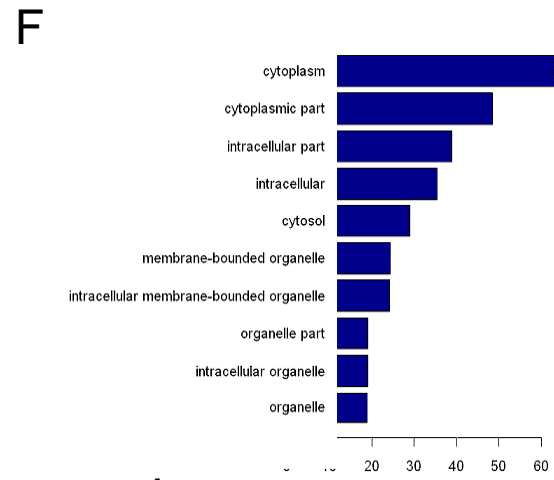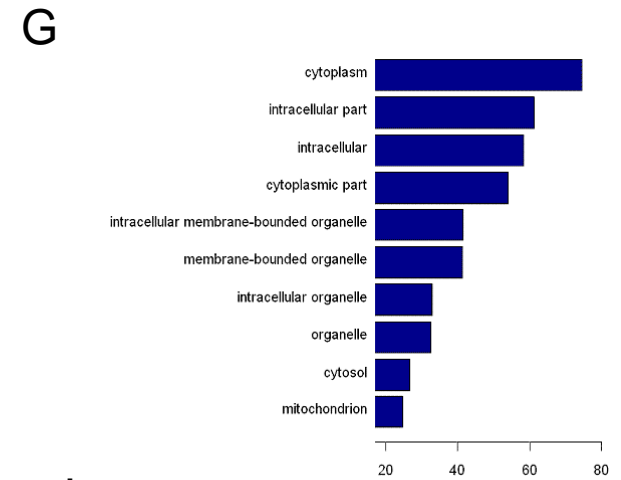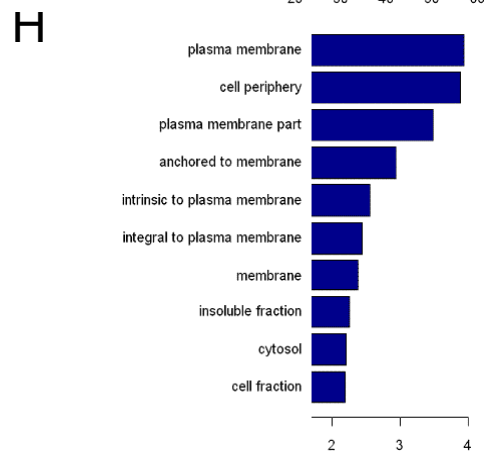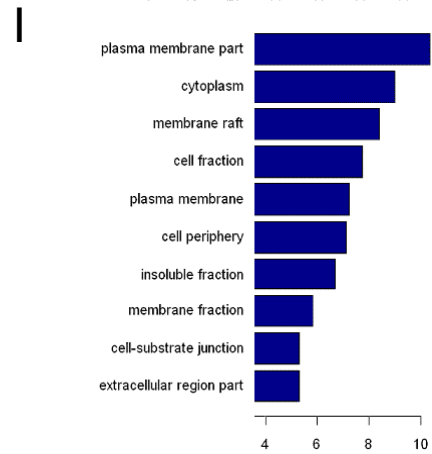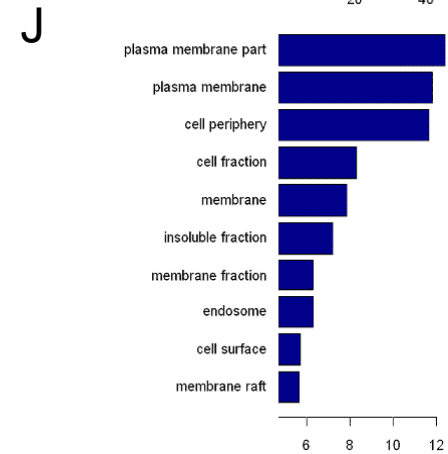

**Suppl.  
Figure 5  
CC-up**

A

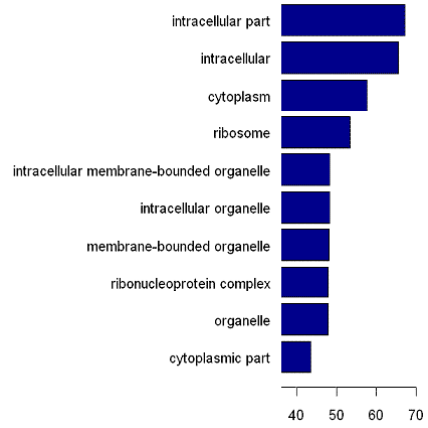

B

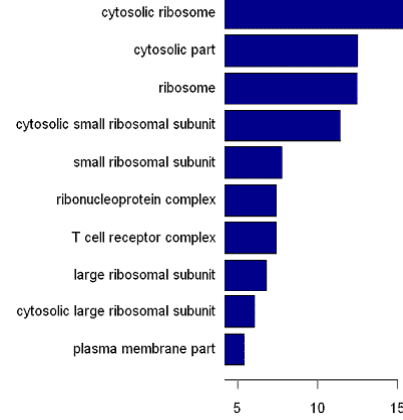

C

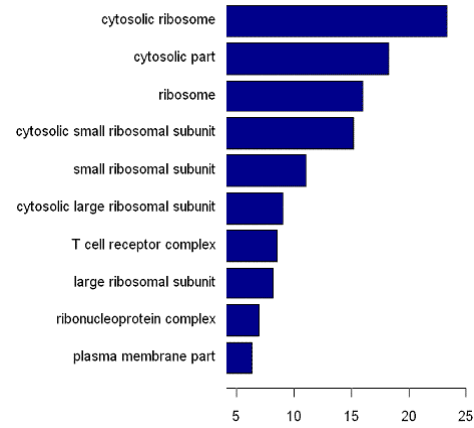

D

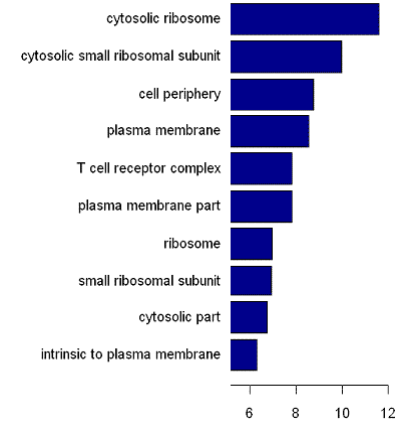

E

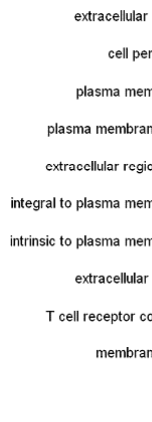

F

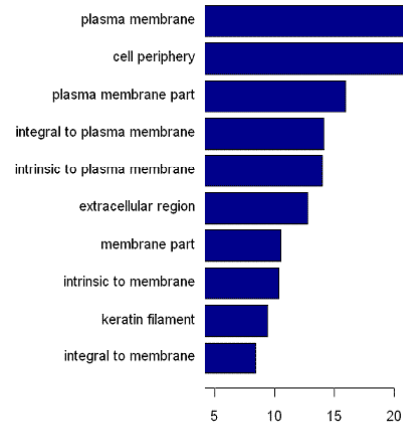

G

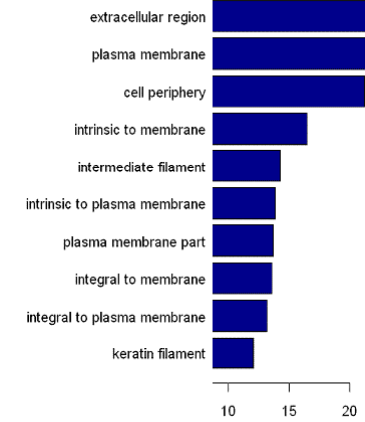

H

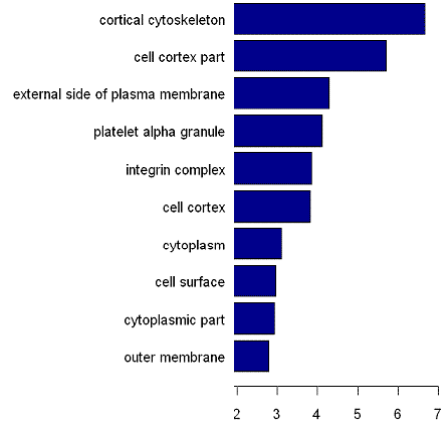

I

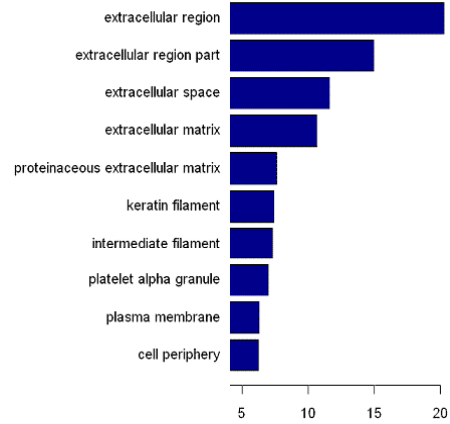

J

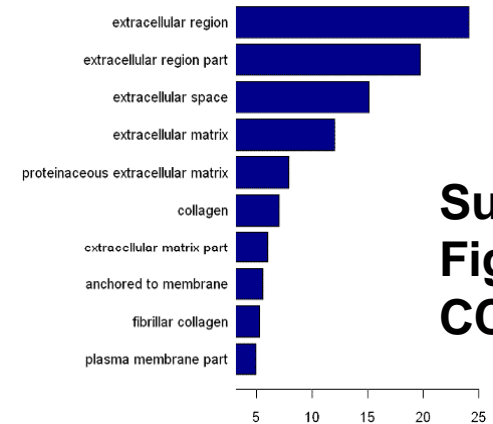

**Suppl.  
Figure 6  
CC-down**

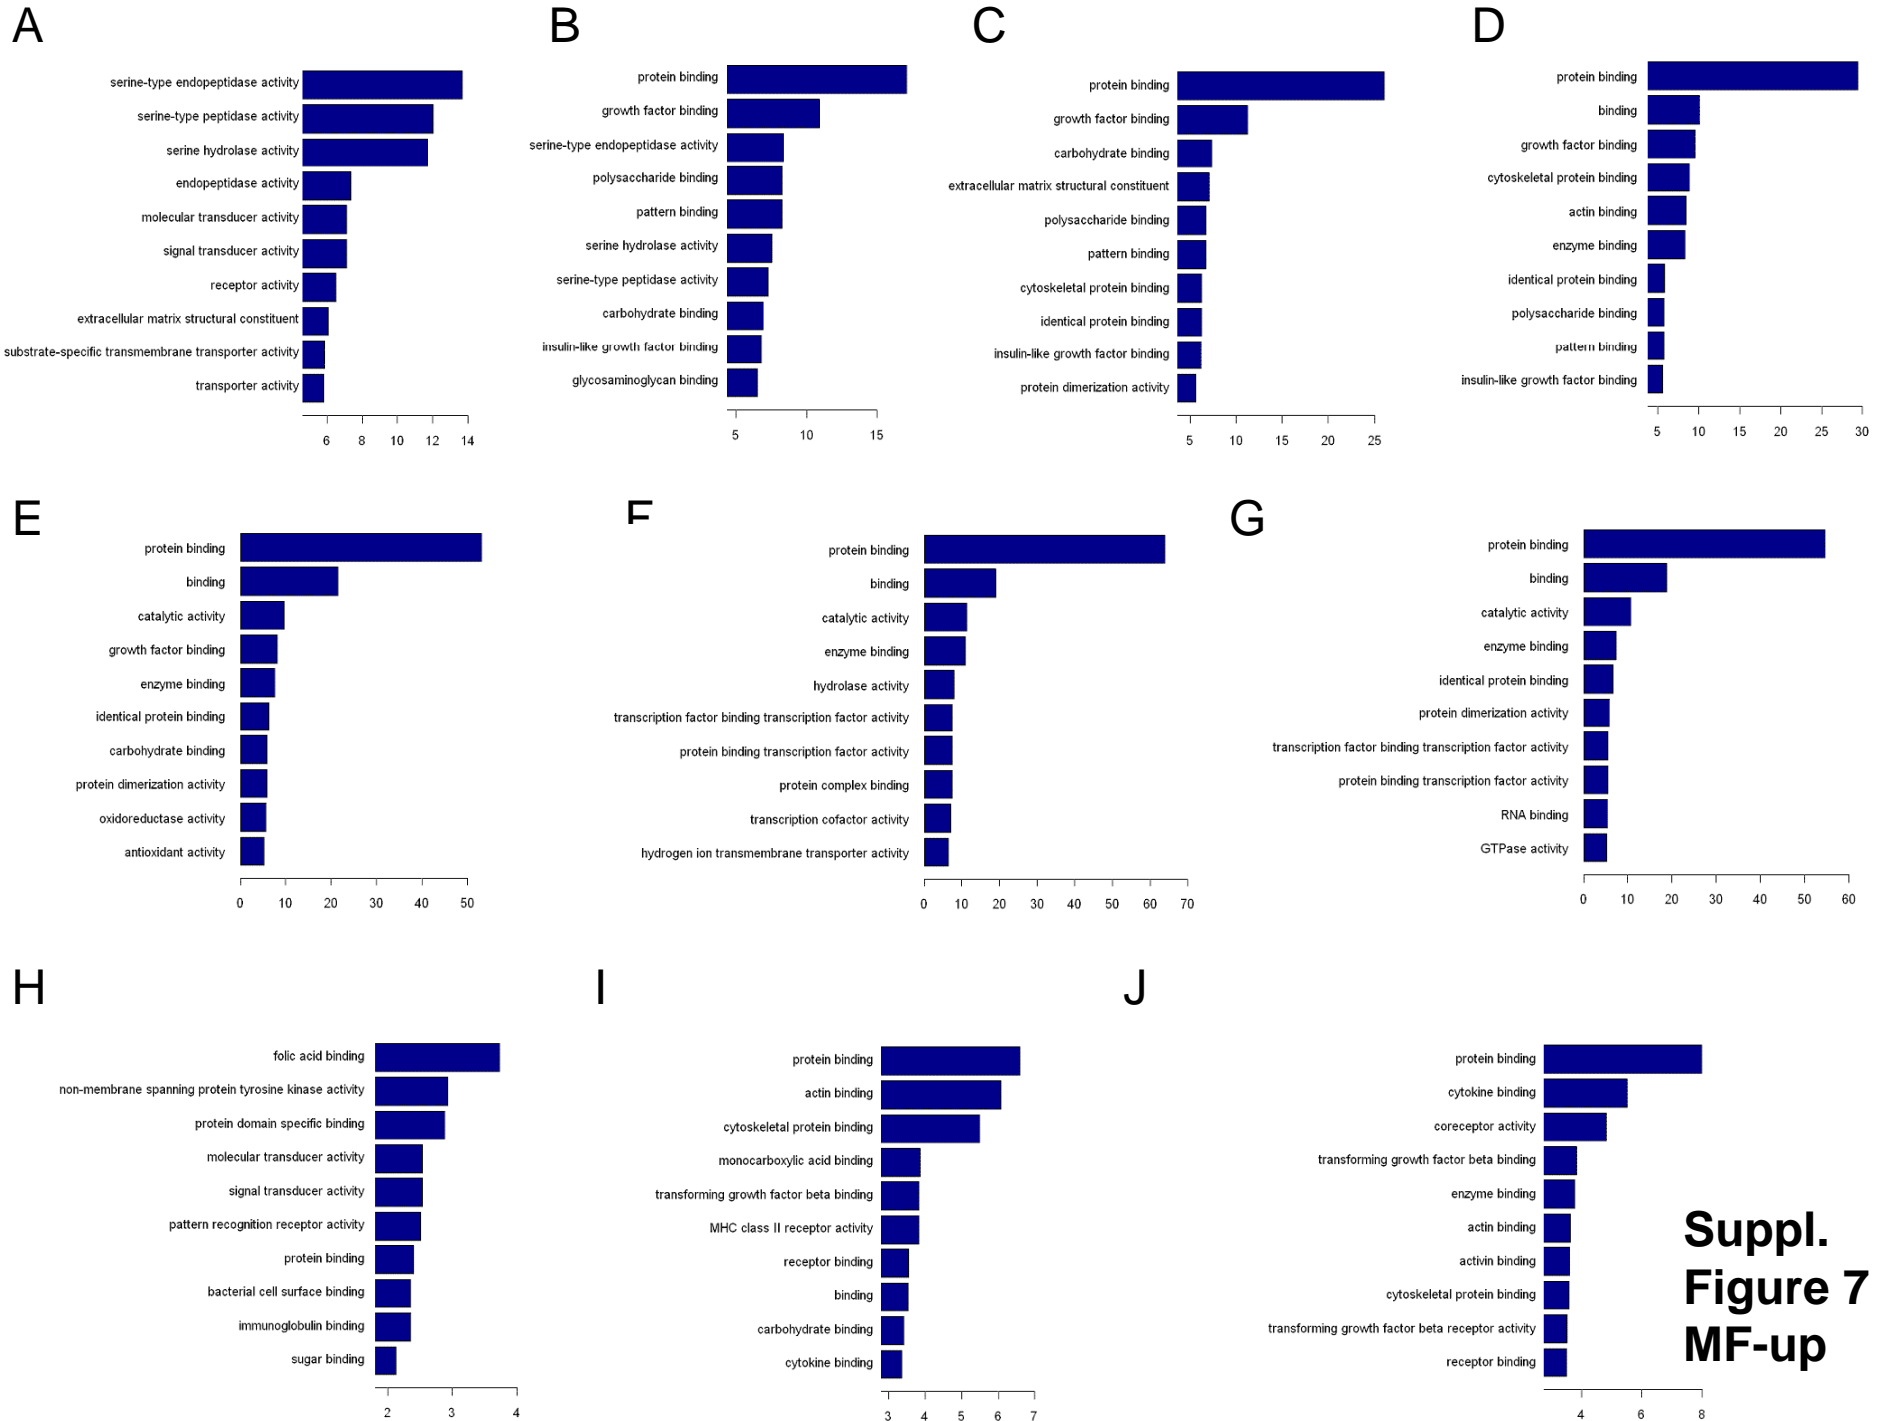

**Suppl.  
Figure 7  
MF-up**

**A**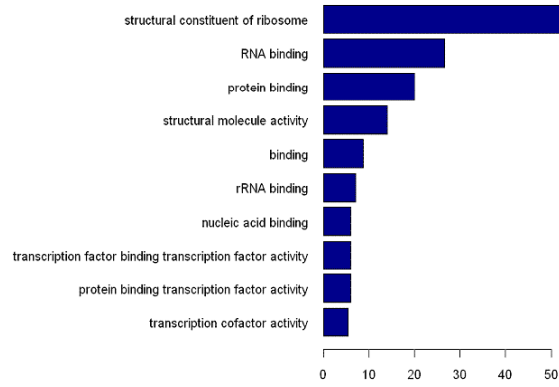**B**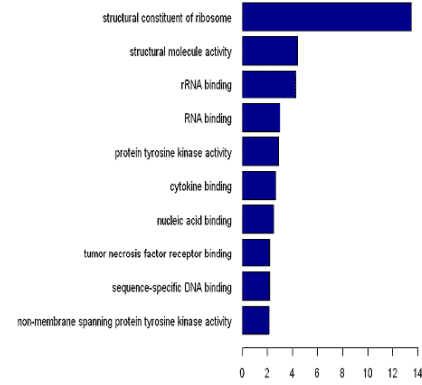**C**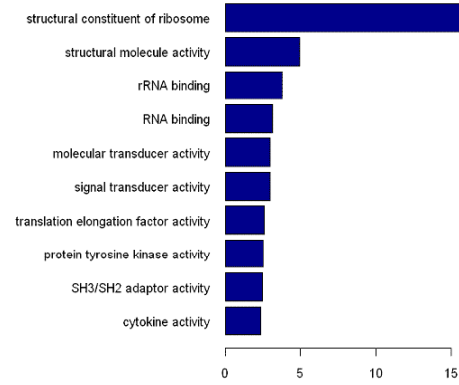**D**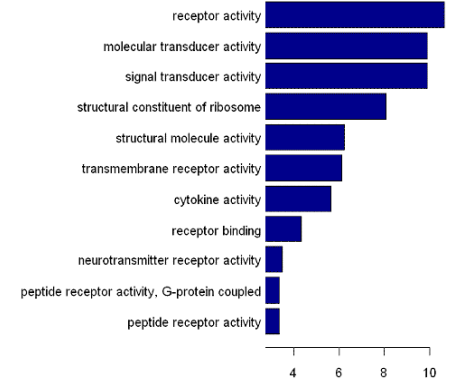**E**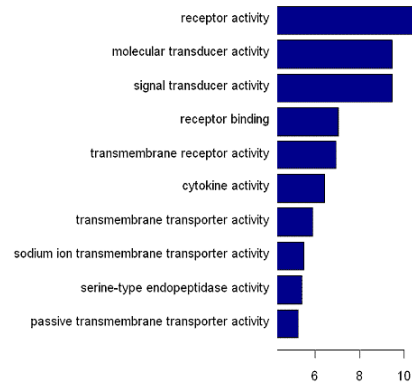**F**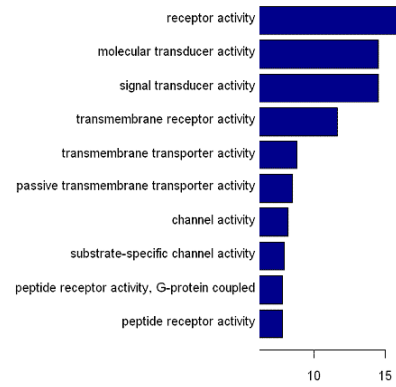**G**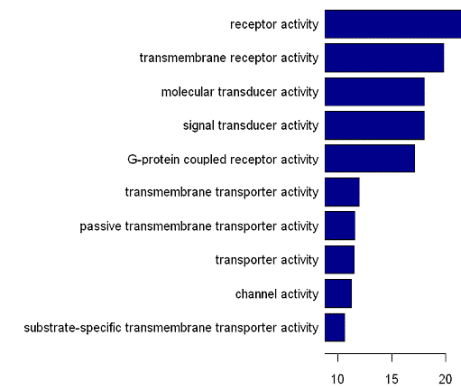**H**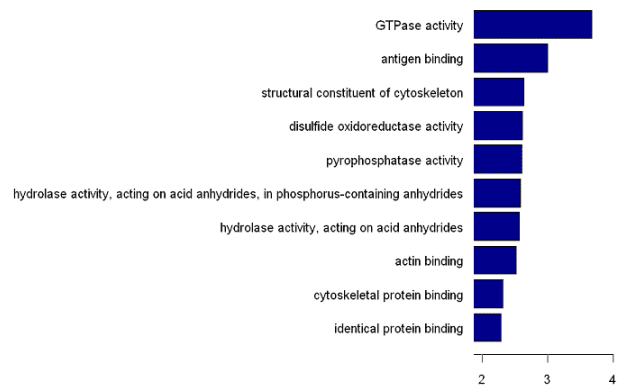**I**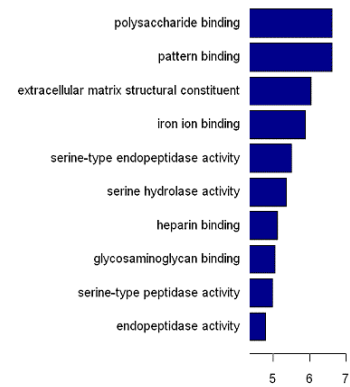**J**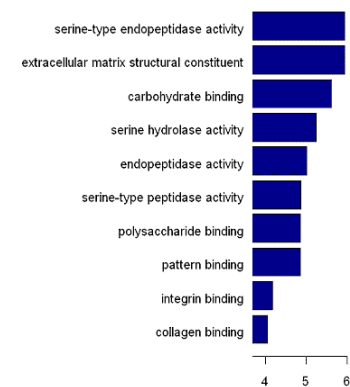

**Suppl.  
Figure 8  
MF-down**
