# Supplementary material for: Dynamic gene expressions of peripheral blood mononuclear cells in patients with acute exacerbation of chronic obstructive pulmonary disease: a preliminary study
Source: Crit Care. 2014 Nov 19;18(6):508. doi: 10.1186/s13054-014-0508-y (PMC4305227; doi:10.1186/s13054-014-0508-y)
Supplement: Additional file 5: — Gene Ontology database. This file lists gene numbers for 10 comparison pairs with certain GO (Gene Ontology) terms and different enrichment score ranges. [file 13054_2014_508_MOESM5_ESM.xls]

## Sheet: BP UP 6-8
UP-REGULATORY GENES ENRICHMENT.SCORE(6,8]
GO.ID	Term	AE-1 vs Con	AE-1 vs Stable	AE-3 vs AE-1	AE-3 vs Con	AE-3 vs Stable	AE-10 vs AE-1	AE-10 vs AE-3	AE-10 vs Con	AE-10 vs Stable	Stable vs Con
GO:0000082	G1/S transition of mitotic cell cycle		50
GO:0000302	response to reactive oxygen species		31
GO:0000902	cell morphogenesis	111
GO:0000904	cell morphogenesis involved in differentiation	99			113
GO:0001568	blood vessel development		79								69
GO:0001932	regulation of protein phosphorylation				110				109
GO:0001944	vasculature development		84					46			71
GO:0002237	response to molecule of bacterial origin		43			50
GO:0002252	immune effector process					82
GO:0002253	activation of immune response		65			76		37		77
GO:0002520	immune system development		87
GO:0002682	regulation of immune system process	121			129					180
GO:0002684	positive regulation of immune system process		98			116		55
GO:0002764	immune response-regulating signaling pathway							31
GO:0003008	system process										254
GO:0006007	glucose catabolic process	23				31
GO:0006082	organic acid metabolic process									198
GO:0006091	generation of precursor metabolites and energy					106				118
GO:0006412	translation					110				118
GO:0006508	proteolysis		171
GO:0006511	ubiquitin-dependent protein catabolic process		78
GO:0006520	cellular amino acid metabolic process									107
GO:0006521	regulation of cellular amino acid metabolic process									27
GO:0006732	coenzyme metabolic process									62
GO:0006810	transport		498
GO:0006886	intracellular protein transport		104
GO:0006915	apoptosis	200			220
GO:0006917	induction of apoptosis								75	105
GO:0006928	cellular component movement					163					120
GO:0006935	chemotaxis	98							103
GO:0006936	muscle contraction										48
GO:0006950	response to stress						202	200
GO:0006952	defense response			42				92
GO:0006954	inflammatory response	73			80
GO:0006955	immune response	147
GO:0006979	response to oxidative stress		54							64
GO:0006984	ER-nucleus signaling pathway					19
GO:0007049	cell cycle		214
GO:0007050	cell cycle arrest		78
GO:0007165	signal transduction		571
GO:0007167	enzyme linked receptor protein signaling pathway				138	169				187
GO:0007169	transmembrane receptor protein tyrosine kinase signaling pathway								105
GO:0007186	G-protein coupled receptor protein signaling pathway										101
GO:0007243	intracellular protein kinase cascade		131			152				170
GO:0007399	nervous system development								216
GO:0007409	axonogenesis	82			94
GO:0007411	axon guidance								71
GO:0007568	aging		44
GO:0007596	blood coagulation		108			121
GO:0007599	hemostasis		109		96	123
GO:0008219	cell death	218			236
GO:0008283	cell proliferation					257
GO:0008285	negative regulation of cell proliferation							49	81
GO:0008544	epidermis development	49
GO:0009060	aerobic respiration									20
GO:0009308	amine metabolic process									142
GO:0009607	response to biotic stimulus	98							99
GO:0009611	response to wounding			43						233
GO:0009617	response to bacterium	59			64				57
GO:0009653	anatomical structure morphogenesis		269
GO:0009719	response to endogenous stimulus	111	131			152				169
GO:0009725	response to hormone stimulus	104	120			139				157
GO:0009887	organ morphogenesis										108
GO:0009888	tissue development								154
GO:0009893	positive regulation of metabolic process		251			289
GO:0009966	regulation of signal transduction				225	277	122	124
GO:0010035	response to inorganic substance		66
GO:0010498	proteasomal protein catabolic process									62
GO:0010565	regulation of cellular ketone metabolic process									48
GO:0010604	positive regulation of macromolecule metabolic process		235			271
GO:0010608	posttranscriptional regulation of gene expression		66			78
GO:0010941	regulation of cell death				178
GO:0010942	positive regulation of cell death					130				140
GO:0012501	programmed cell death	201			221
GO:0012502	induction of programmed cell death								75	105
GO:0014070	response to organic cyclic compound								44
GO:0015031	protein transport		184
GO:0015980	energy derivation by oxidation of organic compounds									93
GO:0016043	cellular component organization		546							696
GO:0016044	cellular membrane organization					115
GO:0016052	carbohydrate catabolic process	38			40
GO:0016071	mRNA metabolic process		112			125
GO:0016192	vesicle-mediated transport					173
GO:0016265	death	218			236
GO:0016477	cell migration		118					65			104
GO:0016567	protein ubiquitination									104
GO:0019220	regulation of phosphate metabolic process		132		122	148			121
GO:0019221	cytokine-mediated signaling pathway							35
GO:0019320	hexose catabolic process	26	30			33
GO:0019725	cellular homeostasis		114
GO:0019941	modification-dependent protein catabolic process		80
GO:0022008	neurogenesis	139			157
GO:0022607	cellular component assembly		208
GO:0023014	signal transduction via phosphorylation event		131			152				170
GO:0023051	regulation of signaling				248			136
GO:0023052	signaling	523				746
GO:0030001	metal ion transport										97
GO:0030030	cell projection organization	117
GO:0030099	myeloid cell differentiation		47			53
GO:0030154	cell differentiation										302
GO:0030163	protein catabolic process		92			109
GO:0030182	neuron differentiation				138				137
GO:0030334	regulation of cell migration	55			57				56
GO:0031175	neuron projection development	100
GO:0031325	positive regulation of cellular metabolic process					279				299
GO:0031397	negative regulation of protein ubiquitination									36
GO:0031399	regulation of protein modification process									187
GO:0031400	negative regulation of protein modification process		47			52				57
GO:0031589	cell-substrate adhesion	38			44				39
GO:0031960	response to corticosteroid stimulus	35			38				37
GO:0032268	regulation of cellular protein metabolic process								157
GO:0032269	negative regulation of cellular protein metabolic process					71
GO:0032270	positive regulation of cellular protein metabolic process		86
GO:0032496	response to lipopolysaccharide	38	40
GO:0032501	multicellular organismal process								685
GO:0032502	developmental process							279
GO:0032879	regulation of localization	145
GO:0032989	cellular component morphogenesis	117
GO:0032990	cell part morphogenesis	96			111
GO:0033238	regulation of cellular amine metabolic process									30
GO:0033365	protein localization to organelle		71
GO:0033554	cellular response to stress					192				213
GO:0034097	response to cytokine stimulus					84				90
GO:0034329	cell junction assembly	36							39
GO:0034330	cell junction organization	40			43				43
GO:0034341	response to interferon-gamma						22	19		37
GO:0034599	cellular response to oxidative stress									30
GO:0034614	cellular response to reactive oxygen species		20							25
GO:0034976	response to endoplasmic reticulum stress		17			19
GO:0035556	intracellular signal transduction									384
GO:0040011	locomotion		186					96			162
GO:0040012	regulation of locomotion	59							59
GO:0042060	wound healing	103				143
GO:0042110	T cell activation							36
GO:0042127	regulation of cell proliferation	150			160			89
GO:0042325	regulation of phosphorylation		127		119
GO:0042330	taxis	98							103
GO:0042981	regulation of apoptosis				175
GO:0043065	positive regulation of apoptosis					127			100	135
GO:0043066	negative regulation of apoptosis	82								120
GO:0043067	regulation of programmed cell death				176
GO:0043068	positive regulation of programmed cell death					127			100	135
GO:0043069	negative regulation of programmed cell death	83								120
GO:0043123	positive regulation of I-kappaB kinase/NF-kappaB cascade									46
GO:0043161	proteasomal ubiquitin-dependent protein catabolic process					56				61
GO:0043170	macromolecule metabolic process		1007			1196
GO:0043412	macromolecule modification		376							487
GO:0043632	modification-dependent macromolecule catabolic process		80
GO:0043933	macromolecular complex subunit organization		175
GO:0044085	cellular component biogenesis		225
GO:0044092	negative regulation of molecular function		109			123				134
GO:0044093	positive regulation of molecular function									187
GO:0044106	cellular amine metabolic process									128
GO:0044257	cellular protein catabolic process		84			98
GO:0044260	cellular macromolecule metabolic process		914			1094				1204
GO:0044275	cellular carbohydrate catabolic process		38			43
GO:0044282	small molecule catabolic process					161				175
GO:0045087	innate immune response	78			88
GO:0045088	regulation of innate immune response									58
GO:0045184	establishment of protein localization		186
GO:0045595	regulation of cell differentiation		134
GO:0045637	regulation of myeloid cell differentiation					33
GO:0045767	regulation of anti-apoptosis		19
GO:0045786	negative regulation of cell cycle		86
GO:0046164	alcohol catabolic process		33
GO:0046365	monosaccharide catabolic process		31			34
GO:0048468	cell development	164			182				171
GO:0048513	organ development								280		277
GO:0048518	positive regulation of biological process						219
GO:0048534	hemopoietic or lymphoid organ development		81
GO:0048545	response to steroid hormone stimulus				62				63
GO:0048583	regulation of response to stimulus		310							392
GO:0048584	positive regulation of response to stimulus	132	158		142	179	85
GO:0048646	anatomical structure formation involved in morphogenesis							61			98
GO:0048666	neuron development	108			123				118
GO:0048667	cell morphogenesis involved in neuron differentiation	87			99
GO:0048699	generation of neurons	132			149				143
GO:0048729	tissue morphogenesis										65
GO:0048812	neuron projection morphogenesis	88			101
GO:0048856	anatomical structure development		494
GO:0048858	cell projection morphogenesis	96
GO:0048869	cellular developmental process										304
GO:0048870	cell motility										111
GO:0050776	regulation of immune response		104				59		93	128
GO:0050778	positive regulation of immune response		74			86		45
GO:0050789	regulation of biological process		1111		1012					1472
GO:0050790	regulation of catalytic activity		210			240
GO:0050793	regulation of developmental process		170
GO:0050794	regulation of cellular process					1263	508	498		1390
GO:0050817	coagulation		109		96	122
GO:0050878	regulation of body fluid levels		116		107
GO:0050896	response to stimulus									1245
GO:0050900	leukocyte migration		51
GO:0051050	positive regulation of transport	63
GO:0051094	positive regulation of developmental process	79			89
GO:0051128	regulation of cellular component organization	124	153			173			135
GO:0051174	regulation of phosphorus metabolic process		132		122	148			121
GO:0051179	localization				529				513	758
GO:0051186	cofactor metabolic process									74
GO:0051234	establishment of localization		502
GO:0051239	regulation of multicellular organismal process		218
GO:0051247	positive regulation of protein metabolic process		89
GO:0051248	negative regulation of protein metabolic process					72
GO:0051270	regulation of cellular component movement	59			62				60
GO:0051329	interphase of mitotic cell cycle		82
GO:0051384	response to glucocorticoid stimulus	32			34				34
GO:0051437	positive regulation of ubiquitin-protein ligase activity involved in mitotic cell cycle		26
GO:0051603	proteolysis involved in cellular protein catabolic process		81			97
GO:0051641	cellular localization									338
GO:0051649	establishment of localization in cell									305
GO:0051674	localization of cell										111
GO:0051704	multi-organism process	148
GO:0051707	response to other organism	83	98		92				88
GO:0051726	regulation of cell cycle		125			138
GO:0051789	response to protein stimulus		38
GO:0055114	oxidation-reduction process									223
GO:0060333	interferon-gamma-mediated signaling pathway						18			31
GO:0060548	negative regulation of cell death	84								124
GO:0061024	membrane organization					116
GO:0061061	muscle structure development	66							68
GO:0065003	macromolecular complex assembly		151
GO:0065007	biological regulation	958
GO:0065009	regulation of molecular function	202							212	312
GO:0070647	protein modification by small protein conjugation or removal									119
GO:0070887	cellular response to chemical stimulus	152	182					94
GO:0071216	cellular response to biotic stimulus					30
GO:0071310	cellular response to organic substance						75		118
GO:0071346	cellular response to interferon-gamma						19
GO:0071840	cellular component organization or biogenesis		559			660				712
GO:0072358	cardiovascular system development		113					60
GO:0072359	circulatory system development		113					60
GO:0072593	reactive oxygen species metabolic process		21
GO:0080134	regulation of response to stress						59	61	95
GO:2000026	regulation of multicellular organismal development	124							127
GO:2000145	regulation of cell motility	55			57				56

## Sheet: BP UP 8-10
UP-REGULATORY GENES ENRICHMENT.SCORE(8,10]
GO.ID	Term	AE-1 vs Con	AE-1 vs Stable	AE-3 vs AE-1	AE-3 vs Con	AE-3 vs Stable	AE-10 vs AE-1	AE-10 vs AE-3	AE-10 vs Con	AE-10 vs Stable	Stable vs Con
GO:0000902	cell morphogenesis				129				127
GO:0000904	cell morphogenesis involved in differentiation								112
GO:0001503	ossification				55
GO:0001525	angiogenesis	58			63
GO:0001775	cell activation					155
GO:0002237	response to molecule of bacterial origin	42			47				46
GO:0002682	regulation of immune system process							79	132
GO:0006007	glucose catabolic process		29
GO:0006464	protein modification process		369							479
GO:0006511	ubiquitin-dependent protein catabolic process					95				107
GO:0006605	protein targeting									91
GO:0006886	intracellular protein transport					124				136
GO:0006915	apoptosis								217
GO:0006916	anti-apoptosis									81
GO:0006928	cellular component movement		148
GO:0006935	chemotaxis				109
GO:0006955	immune response			47	173					236
GO:0007010	cytoskeleton organization								116
GO:0007155	cell adhesion										147
GO:0007165	signal transduction	485				705
GO:0007166	cell surface receptor linked signaling pathway						174		298
GO:0007167	enzyme linked receptor protein signaling pathway								140
GO:0007243	intracellular protein kinase cascade								124
GO:0007275	multicellular organismal development										468
GO:0007409	axonogenesis								95
GO:0007568	aging								44
GO:0008104	protein localization		224
GO:0008219	cell death								238
GO:0008283	cell proliferation	192			211				202
GO:0009605	response to external stimulus				194
GO:0009607	response to biotic stimulus				111
GO:0009611	response to wounding								173
GO:0009653	anatomical structure morphogenesis							144			235
GO:0009719	response to endogenous stimulus				132				127
GO:0009725	response to hormone stimulus				123				120
GO:0009888	tissue development				170
GO:0010033	response to organic substance						123
GO:0010941	regulation of cell death								177
GO:0010942	positive regulation of cell death								103
GO:0012501	programmed cell death								217
GO:0015031	protein transport					222				242
GO:0016043	cellular component organization					651			489
GO:0016052	carbohydrate catabolic process		49			52
GO:0016265	death								238
GO:0019752	carboxylic acid metabolic process									197
GO:0019941	modification-dependent protein catabolic process					97
GO:0022008	neurogenesis								153
GO:0022610	biological adhesion										147
GO:0023014	signal transduction via phosphorylation event								124
GO:0023052	signaling				598					838
GO:0030030	cell projection organization				139
GO:0030154	cell differentiation								322
GO:0030163	protein catabolic process									125
GO:0031175	neuron projection development				116				110
GO:0031325	positive regulation of cellular metabolic process		245
GO:0031399	regulation of protein modification process		158			179
GO:0032269	negative regulation of cellular protein metabolic process		66							78
GO:0032446	protein modification by small protein conjugation									113
GO:0032496	response to lipopolysaccharide				42				43
GO:0032501	multicellular organismal process				741
GO:0032502	developmental process										501
GO:0032879	regulation of localization								160
GO:0032989	cellular component morphogenesis				134
GO:0032990	cell part morphogenesis								110
GO:0034097	response to cytokine stimulus								71
GO:0034613	cellular protein localization		127			150				160
GO:0035556	intracellular signal transduction								268
GO:0042060	wound healing		129		120				112
GO:0042127	regulation of cell proliferation								162
GO:0042180	cellular ketone metabolic process									202
GO:0042221	response to chemical stimulus						197
GO:0042325	regulation of phosphorylation								119
GO:0042330	taxis				109
GO:0042981	regulation of apoptosis								173
GO:0043066	negative regulation of apoptosis					120
GO:0043067	regulation of programmed cell death								174
GO:0043069	negative regulation of programmed cell death					121
GO:0043412	macromolecule modification					452
GO:0043436	oxoacid metabolic process									197
GO:0043632	modification-dependent macromolecule catabolic process					97
GO:0044093	positive regulation of molecular function		158			181
GO:0044257	cellular protein catabolic process									113
GO:0044265	cellular macromolecule catabolic process					139
GO:0044281	small molecule metabolic process		371
GO:0045087	innate immune response		99
GO:0045184	establishment of protein localization					227				248
GO:0045333	cellular respiration									54
GO:0045595	regulation of cell differentiation	118
GO:0046907	intracellular transport		171
GO:0048513	organ development				311
GO:0048514	blood vessel morphogenesis				74
GO:0048518	positive regulation of biological process							224
GO:0048519	negative regulation of biological process				384
GO:0048522	positive regulation of cellular process	349			389
GO:0048523	negative regulation of cellular process	327			354				342
GO:0048545	response to steroid hormone stimulus	61
GO:0048583	regulation of response to stimulus	269				377
GO:0048584	positive regulation of response to stimulus							87	145
GO:0048646	anatomical structure formation involved in morphogenesis	102			112				111
GO:0048667	cell morphogenesis involved in neuron differentiation								102
GO:0048731	system development										398
GO:0048812	neuron projection morphogenesis								102
GO:0048856	anatomical structure development										435
GO:0048858	cell projection morphogenesis				111				110
GO:0048869	cellular developmental process								331
GO:0050776	regulation of immune response					123		62
GO:0050789	regulation of biological process					1341	540	530
GO:0050793	regulation of developmental process								156
GO:0050794	regulation of cellular process								932
GO:0050896	response to stimulus						462
GO:0051179	localization					701
GO:0051239	regulation of multicellular organismal process	199							204
GO:0051248	negative regulation of protein metabolic process		67							80
GO:0051325	interphase		85
GO:0051603	proteolysis involved in cellular protein catabolic process									111
GO:0051641	cellular localization		275
GO:0051649	establishment of localization in cell		248			294
GO:0051704	multi-organism process				165				158	230
GO:0051707	response to other organism					117
GO:0051716	cellular response to stimulus		687
GO:0060548	negative regulation of cell death					123
GO:0065007	biological regulation		1186		1090					1561
GO:0065008	regulation of biological quality				357	456			342
GO:0065009	regulation of molecular function		259			293
GO:0070727	cellular macromolecule localization		128							161
GO:0070887	cellular response to chemical stimulus				172		104
GO:0071310	cellular response to organic substance					155				171
GO:0071345	cellular response to cytokine stimulus						42	39
GO:0071840	cellular component organization or biogenesis								496
GO:0072358	cardiovascular system development										103
GO:0072359	circulatory system development										103
GO:2000026	regulation of multicellular organismal development				143

## Sheet: BP UP 10-
UP-REGULATORY GENES ENRICHMENT.SCORE>10
GO.ID	Term	AE-1 vs Con	AE-1 vs Stable	AE-3 vs AE-1	AE-3 vs Con	AE-3 vs Stable	AE-10 vs AE-1	AE-10 vs AE-3	AE-10 vs Con	AE-10 vs Stable	Stable vs Con
GO:0001525	angiogenesis								65
GO:0001568	blood vessel development	81			86				90
GO:0001944	vasculature development	86			91				94
GO:0002376	immune system process	226	303	66	259	358	141	147	245	349
GO:0002682	regulation of immune system process		156			185
GO:0006464	protein modification process					445
GO:0006915	apoptosis		281			329				337
GO:0006916	anti-apoptosis		71			79
GO:0006928	cellular component movement	145			163				153
GO:0006950	response to stress	387	491		430	560			406	588
GO:0006952	defense response	163	190		184	231	108		181	242
GO:0006955	immune response		196			239	109	109	168
GO:0007155	cell adhesion	157			169				157
GO:0007165	signal transduction				559		315	320	556	784
GO:0007166	cell surface receptor linked signaling pathway							192
GO:0007275	multicellular organismal development	490			525				506
GO:0008104	protein localization					268				290
GO:0008152	metabolic process		1365			1613				1798
GO:0008219	cell death		301			348				365
GO:0008283	cell proliferation		239
GO:0009056	catabolic process		322			375				408
GO:0009057	macromolecule catabolic process		149			171				188
GO:0009605	response to external stimulus	184							189
GO:0009607	response to biotic stimulus		124			147
GO:0009611	response to wounding	173	202		192	230
GO:0009653	anatomical structure morphogenesis	268			288				269
GO:0009888	tissue development	165									166
GO:0009966	regulation of signal transduction								231
GO:0009987	cellular process		1753			2113				2353
GO:0010033	response to organic substance	204	248		230	293			231	316
GO:0010941	regulation of cell death		230			264				273
GO:0012501	programmed cell death		283			331				338
GO:0016071	mRNA metabolic process									150
GO:0016265	death		301			348				365
GO:0016477	cell migration	121			134				128
GO:0019221	cytokine-mediated signaling pathway						41
GO:0019538	protein metabolic process		597			702				751
GO:0019941	modification-dependent protein catabolic process									110
GO:0022610	biological adhesion	157			169				157
GO:0023051	regulation of signaling								253
GO:0023052	signaling						343	345	597
GO:0030030	cell projection organization								138
GO:0030154	cell differentiation	317			350
GO:0032268	regulation of cellular protein metabolic process		213			238				247
GO:0032501	multicellular organismal process	683									707
GO:0032502	developmental process	539			580				555
GO:0032989	cellular component morphogenesis								134
GO:0033036	macromolecule localization		268			317				347
GO:0033554	cellular response to stress		181
GO:0034097	response to cytokine stimulus						55	51
GO:0040011	locomotion	188			207				191
GO:0042221	response to chemical stimulus	369	410		398	479		200	384	516
GO:0042981	regulation of apoptosis		225			261				267
GO:0043066	negative regulation of apoptosis		112
GO:0043067	regulation of programmed cell death		226			262				268
GO:0043069	negative regulation of programmed cell death		113
GO:0043632	modification-dependent macromolecule catabolic process									110
GO:0044237	cellular metabolic process		1224			1454				1636
GO:0044238	primary metabolic process		1226			1450				1617
GO:0044248	cellular catabolic process		269			316				356
GO:0044265	cellular macromolecule catabolic process		124							158
GO:0044267	cellular protein metabolic process		522			622				673
GO:0044281	small molecule metabolic process					437				497
GO:0044419	interspecies interaction between organisms		101			112				123
GO:0045087	innate immune response					122	65		94	132
GO:0045595	regulation of cell differentiation				137
GO:0046907	intracellular transport					210				221
GO:0048513	organ development	293
GO:0048514	blood vessel morphogenesis	70							75
GO:0048518	positive regulation of biological process	393	502		435	586			435	611
GO:0048519	negative regulation of biological process	355	465			529			373	557
GO:0048522	positive regulation of cellular process		455			531			387	552
GO:0048523	negative regulation of cellular process		437			496				525
GO:0048583	regulation of response to stimulus				305		179	183	311
GO:0048731	system development	425			451				439
GO:0048856	anatomical structure development	467			498				486
GO:0048869	cellular developmental process	323			359
GO:0048870	cell motility	123			137				130
GO:0050789	regulation of biological process								998
GO:0050793	regulation of developmental process	154			174
GO:0050896	response to stimulus	842	975		943	1151		471	895
GO:0051179	localization		611
GO:0051239	regulation of multicellular organismal process				222
GO:0051246	regulation of protein metabolic process		221			248				258
GO:0051641	cellular localization					324
GO:0051674	localization of cell	123			137				130
GO:0051704	multi-organism process		206			230
GO:0051716	cellular response to stimulus	582			655	827	356	356	649	928
GO:0060548	negative regulation of cell death		114
GO:0065007	biological regulation					1428	578	565	1068
GO:0065008	regulation of biological quality	333	404
GO:0070727	cellular macromolecule localization					152
GO:0070887	cellular response to chemical stimulus					224			174	250
GO:0072358	cardiovascular system development	114			123				124
GO:0072359	circulatory system development	114			123				124

## Sheet: BP DOWN 2-3
DOWN-REGULATORY GENES ENRICHMENT.SCORE(2,3]
GO.ID	Term	AE-1 vs Con	AE-1 vs Stable	AE-3 vs AE-1	AE-3 vs Con	AE-3 vs Stable	AE-10 vs AE-1	AE-10 vs AE-3	AE-10 vs Con	AE-10 vs Stable	Stable vs Con
GO:0000079	regulation of cyclin-dependent protein kinase activity								11
GO:0000288	nuclear-transcribed mRNA catabolic process, deadenylation-dependent decay										16
GO:0000387	spliceosomal snRNP assembly										10
GO:0000956	nuclear-transcribed mRNA catabolic process										20
GO:0001501	skeletal system development		42					28
GO:0001505	regulation of neurotransmitter levels		18
GO:0001525	angiogenesis							24
GO:0001654	eye development		24
GO:0001657	ureteric bud development								12
GO:0001659	temperature homeostasis		8
GO:0001662	behavioral fear response				5	5				5
GO:0001666	response to hypoxia							16
GO:0001775	cell activation		72					48		93
GO:0001817	regulation of cytokine production	36
GO:0001818	negative regulation of cytokine production										22
GO:0001838	embryonic epithelial tube formation				14					15
GO:0001894	tissue homeostasis				14
GO:0001906	cell killing	14			15				13
GO:0001909	leukocyte mediated cytotoxicity	10			11				9
GO:0001912	positive regulation of leukocyte mediated cytotoxicity	7			7				6
GO:0001913	T cell mediated cytotoxicity	6			6
GO:0001914	regulation of T cell mediated cytotoxicity				6
GO:0001934	positive regulation of protein phosphorylation			8		28
GO:0001935	endothelial cell proliferation						9	8
GO:0001942	hair follicle development									14
GO:0001944	vasculature development						31
GO:0001947	heart looping					10				9
GO:0001963	synaptic transmission, dopaminergic									7
GO:0001964	startle response	5
GO:0001974	blood vessel remodeling		6
GO:0002009	morphogenesis of an epithelium		33			40
GO:0002011	morphogenesis of an epithelial sheet					5				5
GO:0002021	response to dietary excess					6
GO:0002028	regulation of sodium ion transport		7
GO:0002029	desensitization of G-protein coupled receptor protein signaling pathway					5
GO:0002062	chondrocyte differentiation	10	9
GO:0002209	behavioral defense response				5	5				5
GO:0002250	adaptive immune response			9	25
GO:0002252	immune effector process			13		47
GO:0002274	myeloid leukocyte activation							9
GO:0002376	immune system process									189
GO:0002429	immune response-activating cell surface receptor signaling pathway			7
GO:0002456	T cell mediated immunity	9							7
GO:0002460	adaptive immune response based on somatic recombination of immune receptors built from immunoglobulin superfamily domains			9	24
GO:0002520	immune system development		46	14							76
GO:0002521	leukocyte differentiation		29			36
GO:0002526	acute inflammatory response							11
GO:0002682	regulation of immune system process		77	24		102
GO:0002683	negative regulation of immune system process								15
GO:0002684	positive regulation of immune system process								53		87
GO:0002685	regulation of leukocyte migration							8
GO:0002688	regulation of leukocyte chemotaxis							6
GO:0002694	regulation of leukocyte activation					42					51
GO:0002695	negative regulation of leukocyte activation									14
GO:0002696	positive regulation of leukocyte activation					32
GO:0002697	regulation of immune effector process					28			21
GO:0002702	positive regulation of production of molecular mediator of immune response										7
GO:0002703	regulation of leukocyte mediated immunity					15			12
GO:0002705	positive regulation of leukocyte mediated immunity	9			10				8
GO:0002706	regulation of lymphocyte mediated immunity					14			12
GO:0002708	positive regulation of lymphocyte mediated immunity	9			10				8
GO:0002709	regulation of T cell mediated immunity	7			8
GO:0002720	positive regulation of cytokine production involved in immune response				5
GO:0002762	negative regulation of myeloid leukocyte differentiation							5
GO:0002768	immune response-regulating cell surface receptor signaling pathway		19	7
GO:0002790	peptide secretion									29
GO:0002791	regulation of peptide secretion					24
GO:0002819	regulation of adaptive immune response	13
GO:0002821	positive regulation of adaptive immune response	9			10
GO:0002822	regulation of adaptive immune response based on somatic recombination of immune receptors built from immunoglobulin superfamily domains	13
GO:0002824	positive regulation of adaptive immune response based on somatic recombination of immune receptors built from immunoglobulin superfamily domains	9			10
GO:0002920	regulation of humoral immune response					6
GO:0003001	generation of a signal involved in cell-cell signaling					46
GO:0003007	heart morphogenesis									22
GO:0003009	skeletal muscle contraction									6
GO:0003014	renal system process					11
GO:0003071	renal system process involved in regulation of systemic arterial blood pressure		5
GO:0003073	regulation of systemic arterial blood pressure									12
GO:0003081	regulation of systemic arterial blood pressure by renin-angiotensin		5
GO:0003084	positive regulation of systemic arterial blood pressure		4
GO:0003091	renal water homeostasis					7				8
GO:0003143	embryonic heart tube morphogenesis					10				9
GO:0003208	cardiac ventricle morphogenesis					9
GO:0005975	carbohydrate metabolic process							48
GO:0005976	polysaccharide metabolic process							15
GO:0005977	glycogen metabolic process							8
GO:0006000	fructose metabolic process							4
GO:0006007	glucose catabolic process							10
GO:0006026	aminoglycan catabolic process							5
GO:0006066	alcohol metabolic process							41
GO:0006073	cellular glucan metabolic process							8
GO:0006084	acetyl-CoA metabolic process										14
GO:0006096	glycolysis						9	8
GO:0006120	mitochondrial electron transport, NADH to ubiquinone										14
GO:0006139	nucleobase, nucleoside, nucleotide and nucleic acid metabolic process	469			520
GO:0006140	regulation of nucleotide metabolic process									50
GO:0006164	purine nucleotide biosynthetic process					41
GO:0006171	cAMP biosynthetic process		19						17
GO:0006213	pyrimidine nucleoside metabolic process							7
GO:0006259	DNA metabolic process										115
GO:0006342	chromatin silencing										9
GO:0006352	transcription initiation, DNA-dependent										26
GO:0006353	transcription termination, DNA-dependent										20
GO:0006354	transcription elongation, DNA-dependent										24
GO:0006357	regulation of transcription from RNA polymerase II promoter				112
GO:0006364	rRNA processing	18			18
GO:0006367	transcription initiation from RNA polymerase II promoter										20
GO:0006399	tRNA metabolic process										30
GO:0006401	RNA catabolic process										27
GO:0006412	translation								48
GO:0006418	tRNA aminoacylation for protein translation										14
GO:0006458	de novo' protein folding										15
GO:0006461	protein complex assembly			20
GO:0006468	protein phosphorylation				130
GO:0006469	negative regulation of protein kinase activity	19
GO:0006473	protein acetylation										23
GO:0006497	protein lipidation				12
GO:0006584	catecholamine metabolic process		8			10
GO:0006612	protein targeting to membrane										13
GO:0006625	protein targeting to peroxisome				6
GO:0006687	glycosphingolipid metabolic process			3
GO:0006754	ATP biosynthetic process										18
GO:0006807	nitrogen compound metabolic process	513			569
GO:0006813	potassium ion transport		25							33
GO:0006814	sodium ion transport									27
GO:0006818	hydrogen transport										20
GO:0006833	water transport					10
GO:0006836	neurotransmitter transport		21			24
GO:0006865	amino acid transport		18
GO:0006873	cellular ion homeostasis		57					37
GO:0006874	cellular calcium ion homeostasis		30				21
GO:0006875	cellular metal ion homeostasis		38				26
GO:0006887	exocytosis			10
GO:0006913	nucleocytoplasmic transport										53
GO:0006915	apoptosis	143		37
GO:0006916	anti-apoptosis			11				21
GO:0006917	induction of apoptosis								44
GO:0006937	regulation of muscle contraction									18
GO:0006939	smooth muscle contraction									15
GO:0006940	regulation of smooth muscle contraction		9							10
GO:0006941	striated muscle contraction									14
GO:0006950	response to stress				281						391
GO:0006953	acute-phase response							7
GO:0007005	mitochondrion organization										33
GO:0007006	mitochondrial membrane organization										10
GO:0007009	plasma membrane organization										11
GO:0007016	cytoskeletal anchoring at plasma membrane									5
GO:0007030	Golgi organization										8
GO:0007155	cell adhesion						60			120
GO:0007160	cell-matrix adhesion							13
GO:0007167	enzyme linked receptor protein signaling pathway		81
GO:0007168	receptor guanylyl cyclase signaling pathway					5
GO:0007189	activation of adenylate cyclase activity by G-protein signaling pathway	9	9			12
GO:0007193	inhibition of adenylate cyclase activity by G-protein signaling pathway					11
GO:0007194	negative regulation of adenylate cyclase activity					13				15
GO:0007202	activation of phospholipase C activity									23
GO:0007204	elevation of cytosolic calcium ion concentration								22
GO:0007229	integrin-mediated signaling pathway			5			9
GO:0007259	JAK-STAT cascade							9
GO:0007269	neurotransmitter secretion		14							17
GO:0007274	neuromuscular synaptic transmission			3
GO:0007275	multicellular organismal development	329			369
GO:0007338	single fertilization		14			15				16
GO:0007368	determination of left/right symmetry		13
GO:0007369	gastrulation		16
GO:0007389	pattern specification process					56
GO:0007417	central nervous system development					75
GO:0007422	peripheral nervous system development		10
GO:0007423	sensory organ development		39			47
GO:0007492	endoderm development					10
GO:0007498	mesoderm development					16
GO:0007512	adult heart development					5				5
GO:0007565	female pregnancy									23
GO:0007568	aging						17		22
GO:0007586	digestion									22
GO:0007588	excretion		13			15
GO:0007596	blood coagulation				66	72
GO:0007599	hemostasis				67	73
GO:0007602	phototransduction		8							10
GO:0007605	sensory perception of sound					19				21
GO:0007612	learning		11
GO:0007613	memory									11
GO:0007618	mating									9
GO:0007622	rhythmic behavior		6
GO:0007625	grooming behavior		5							6
GO:0007631	feeding behavior								13
GO:0007632	visual behavior									9
GO:0008016	regulation of heart contraction		14
GO:0008217	regulation of blood pressure								16
GO:0008219	cell death	154		42
GO:0008277	regulation of G-protein coupled receptor protein signaling pathway					15
GO:0008283	cell proliferation				145		81		117
GO:0008284	positive regulation of cell proliferation				67			40
GO:0008544	epidermis development							22
GO:0008624	induction of apoptosis by extracellular signals	20			22
GO:0008625	induction of apoptosis via death domain receptors										7
GO:0008633	activation of pro-apoptotic gene products										10
GO:0009084	glutamine family amino acid biosynthetic process									6
GO:0009124	nucleoside monophosphate biosynthetic process		24
GO:0009141	nucleoside triphosphate metabolic process										82
GO:0009144	purine nucleoside triphosphate metabolic process										82
GO:0009145	purine nucleoside triphosphate biosynthetic process										20
GO:0009150	purine ribonucleotide metabolic process										84
GO:0009152	purine ribonucleotide biosynthetic process										25
GO:0009166	nucleotide catabolic process										78
GO:0009187	cyclic nucleotide metabolic process		25						21
GO:0009190	cyclic nucleotide biosynthetic process								21
GO:0009199	ribonucleoside triphosphate metabolic process										80
GO:0009201	ribonucleoside triphosphate biosynthetic process										20
GO:0009205	purine ribonucleoside triphosphate metabolic process										80
GO:0009206	purine ribonucleoside triphosphate biosynthetic process										20
GO:0009259	ribonucleotide metabolic process										87
GO:0009260	ribonucleotide biosynthetic process										27
GO:0009266	response to temperature stimulus		17
GO:0009311	oligosaccharide metabolic process										18
GO:0009409	response to cold		7
GO:0009416	response to light stimulus									29
GO:0009566	fertilization									18
GO:0009581	detection of external stimulus									17
GO:0009583	detection of light stimulus									11
GO:0009605	response to external stimulus					146			103	152
GO:0009611	response to wounding									136
GO:0009620	response to fungus							6
GO:0009628	response to abiotic stimulus									67
GO:0009653	anatomical structure morphogenesis		157			202		100		208
GO:0009712	catechol metabolic process		8			10
GO:0009719	response to endogenous stimulus							46
GO:0009790	embryo development		79			98
GO:0009792	embryo development ending in birth or egg hatching		46
GO:0009798	axis specification		12			14
GO:0009799	specification of symmetry		13
GO:0009855	determination of bilateral symmetry		13
GO:0009887	organ morphogenesis		67			89
GO:0009889	regulation of biosynthetic process	324			365
GO:0009890	negative regulation of biosynthetic process										144
GO:0009891	positive regulation of biosynthetic process	114
GO:0009914	hormone transport					33				33
GO:0009967	positive regulation of signal transduction				64
GO:0009968	negative regulation of signal transduction		50	15				31
GO:0009987	cellular process				1269
GO:0009991	response to extracellular stimulus								36	51
GO:0010002	cardioblast differentiation		5
GO:0010035	response to inorganic substance							25
GO:0010043	response to zinc ion				8
GO:0010466	negative regulation of peptidase activity							12
GO:0010468	regulation of gene expression				351
GO:0010552	positive regulation of gene-specific transcription from RNA polymerase II promoter		22		26
GO:0010556	regulation of macromolecule biosynthetic process	308			348
GO:0010557	positive regulation of macromolecule biosynthetic process	110			120
GO:0010558	negative regulation of macromolecule biosynthetic process										138
GO:0010563	negative regulation of phosphorus metabolic process							9
GO:0010565	regulation of cellular ketone metabolic process										30
GO:0010578	regulation of adenylate cyclase activity involved in G-protein signaling pathway	9	9			12
GO:0010579	positive regulation of adenylate cyclase activity by G-protein signaling pathway	9	9			12
GO:0010605	negative regulation of macromolecule metabolic process			29
GO:0010628	positive regulation of gene expression				109
GO:0010629	negative regulation of gene expression										129
GO:0010639	negative regulation of organelle organization			7
GO:0010646	regulation of cell communication					135
GO:0010647	positive regulation of cell communication				66
GO:0010648	negative regulation of cell communication			15				34
GO:0010721	negative regulation of cell development									18
GO:0010743	regulation of macrophage derived foam cell differentiation						6
GO:0010810	regulation of cell-substrate adhesion							9
GO:0010817	regulation of hormone levels					55		27		57
GO:0010863	positive regulation of phospholipase C activity									23
GO:0010876	lipid localization			10
GO:0010883	regulation of lipid storage						6
GO:0010941	regulation of cell death	115		30
GO:0010942	positive regulation of cell death								58
GO:0010948	negative regulation of cell cycle process							9
GO:0010959	regulation of metal ion transport								20
GO:0012501	programmed cell death	143		37
GO:0012502	induction of programmed cell death								45
GO:0014072	response to isoquinoline alkaloid									6
GO:0014812	muscle cell migration				8				7
GO:0014855	striated muscle cell proliferation		6
GO:0014909	smooth muscle cell migration				8				6
GO:0014910	regulation of smooth muscle cell migration				7
GO:0014911	positive regulation of smooth muscle cell migration				5					5
GO:0015074	DNA integration										7
GO:0015672	monovalent inorganic cation transport					55
GO:0015701	bicarbonate transport									6
GO:0015718	monocarboxylic acid transport					17
GO:0015721	bile acid and bile salt transport									7
GO:0015833	peptide transport									32
GO:0015837	amine transport		25			30
GO:0015844	monoamine transport					11
GO:0015872	dopamine transport									7
GO:0015908	fatty acid transport					12
GO:0015909	long-chain fatty acid transport					10
GO:0015914	phospholipid transport							6
GO:0015992	proton transport										19
GO:0016043	cellular component organization	332			371
GO:0016049	cell growth					48
GO:0016052	carbohydrate catabolic process										32
GO:0016055	Wnt receptor signaling pathway		29			36
GO:0016072	rRNA metabolic process	18			18
GO:0016192	vesicle-mediated transport							54
GO:0016202	regulation of striated muscle tissue development	12	11						11
GO:0016265	death	154		42
GO:0016310	phosphorylation				142
GO:0016331	morphogenesis of embryonic epithelium					19				19
GO:0016337	cell-cell adhesion							27
GO:0016481	negative regulation of transcription										122
GO:0016486	peptide hormone processing		6
GO:0016567	protein ubiquitination										68
GO:0016568	chromatin modification										74
GO:0016569	covalent chromatin modification										45
GO:0018149	peptide cross-linking						6			8
GO:0018193	peptidyl-amino acid modification										82
GO:0018298	protein-chromophore linkage									6
GO:0018958	phenol-containing compound metabolic process					12
GO:0019059	initiation of viral infection										9
GO:0019220	regulation of phosphate metabolic process							47
GO:0019229	regulation of vasoconstriction									11
GO:0019395	fatty acid oxidation			6
GO:0019438	aromatic compound biosynthetic process										10
GO:0019722	calcium-mediated signaling		12			14
GO:0019725	cellular homeostasis					81
GO:0019827	stem cell maintenance								7
GO:0019835	cytolysis		7
GO:0019882	antigen processing and presentation	13
GO:0019932	second-messenger-mediated signaling		41
GO:0019933	cAMP-mediated signaling		20
GO:0019935	cyclic-nucleotide-mediated signaling								23
GO:0019953	sexual reproduction		57
GO:0021510	spinal cord development		11			13			10
GO:0021515	cell differentiation in spinal cord		8			9			8
GO:0021536	diencephalon development									11
GO:0021602	cranial nerve morphogenesis									5
GO:0021915	neural tube development									19
GO:0021954	central nervous system neuron development									9
GO:0022008	neurogenesis		97				61
GO:0022401	negative adaptation of signaling pathway					5
GO:0022403	cell cycle phase						54				132
GO:0022404	molting cycle process									14
GO:0022405	hair cycle process									14
GO:0022409	positive regulation of cell-cell adhesion	6	6
GO:0022410	circadian sleep/wake cycle process		6							6
GO:0022600	digestive system process									12
GO:0022603	regulation of anatomical structure morphogenesis				45				35
GO:0022610	biological adhesion						60			120
GO:0022613	ribonucleoprotein complex biogenesis	29			34
GO:0022898	regulation of transmembrane transporter activity									15
GO:0023052	signaling				443
GO:0023056	positive regulation of signaling				66
GO:0023057	negative regulation of signaling			15				34
GO:0023058	adaptation of signaling pathway					5
GO:0023061	signal release					46
GO:0030003	cellular cation homeostasis		41				28	27		54
GO:0030042	actin filament depolymerization						6	6
GO:0030048	actin filament-based movement			5		14
GO:0030049	muscle filament sliding					11
GO:0030072	peptide hormone secretion									27
GO:0030073	insulin secretion					26
GO:0030097	hemopoiesis			14		51
GO:0030098	lymphocyte differentiation		22			26					33
GO:0030099	myeloid cell differentiation			8				17
GO:0030104	water homeostasis					8				8
GO:0030146	diuresis									5
GO:0030154	cell differentiation			52
GO:0030155	regulation of cell adhesion							16
GO:0030168	platelet activation			11				23	31
GO:0030182	neuron differentiation		86
GO:0030183	B cell differentiation								10		15
GO:0030193	regulation of blood coagulation		10
GO:0030194	positive regulation of blood coagulation		5
GO:0030195	negative regulation of blood coagulation		9
GO:0030217	T cell differentiation		19			22
GO:0030218	erythrocyte differentiation							8
GO:0030225	macrophage differentiation						5
GO:0030252	growth hormone secretion		5
GO:0030307	positive regulation of cell growth	12							11
GO:0030336	negative regulation of cell migration						11	11
GO:0030534	adult behavior		13			15
GO:0030593	neutrophil chemotaxis							6
GO:0030799	regulation of cyclic nucleotide metabolic process								19
GO:0030801	positive regulation of cyclic nucleotide metabolic process					9
GO:0030802	regulation of cyclic nucleotide biosynthetic process								19
GO:0030804	positive regulation of cyclic nucleotide biosynthetic process					9
GO:0030808	regulation of nucleotide biosynthetic process								19
GO:0030810	positive regulation of nucleotide biosynthetic process					9
GO:0030814	regulation of cAMP metabolic process		19						17
GO:0030817	regulation of cAMP biosynthetic process		19						17
GO:0030834	regulation of actin filament depolymerization						6	6
GO:0030835	negative regulation of actin filament depolymerization							5
GO:0030890	positive regulation of B cell proliferation				8
GO:0030901	midbrain development									8
GO:0031056	regulation of histone modification				7
GO:0031123	RNA 3'-end processing										20
GO:0031279	regulation of cyclase activity								17
GO:0031280	negative regulation of cyclase activity					13				15
GO:0031281	positive regulation of cyclase activity		11						11
GO:0031326	regulation of cellular biosynthetic process				359
GO:0031327	negative regulation of cellular biosynthetic process										142
GO:0031328	positive regulation of cellular biosynthetic process	111
GO:0031333	negative regulation of protein complex assembly			5			8
GO:0031341	regulation of cell killing					9
GO:0031343	positive regulation of cell killing					8
GO:0031347	regulation of defense response				45
GO:0031398	positive regulation of protein ubiquitination										27
GO:0031640	killing of cells of other organism							5
GO:0031644	regulation of neurological system process		22			28
GO:0031645	negative regulation of neurological system process									9
GO:0031667	response to nutrient levels								34	48
GO:0031960	response to corticosteroid stimulus							14
GO:0032095	regulation of response to food									6
GO:0032098	regulation of appetite	5	5		5	5			5	6
GO:0032101	regulation of response to external stimulus		32			40
GO:0032102	negative regulation of response to external stimulus		13					10	13
GO:0032104	regulation of response to extracellular stimulus									6
GO:0032105	negative regulation of response to extracellular stimulus									5
GO:0032107	regulation of response to nutrient levels									6
GO:0032108	negative regulation of response to nutrient levels									5
GO:0032268	regulation of cellular protein metabolic process										163
GO:0032272	negative regulation of protein polymerization			4
GO:0032409	regulation of transporter activity									16
GO:0032446	protein modification by small protein conjugation										73
GO:0032479	regulation of type I interferon production										15
GO:0032480	negative regulation of type I interferon production										11
GO:0032496	response to lipopolysaccharide							16
GO:0032502	developmental process							212
GO:0032535	regulation of cellular component size							32
GO:0032583	regulation of gene-specific transcription				55
GO:0032606	type I interferon production										15
GO:0032612	interleukin-1 production							5
GO:0032769	negative regulation of monooxygenase activity								4
GO:0032844	regulation of homeostatic process			8	24		16		22	27
GO:0032846	positive regulation of homeostatic process					14			11
GO:0032879	regulation of localization					126
GO:0032890	regulation of organic acid transport					7
GO:0032940	secretion by cell							41		86
GO:0032943	mononuclear cell proliferation				24
GO:0032946	positive regulation of mononuclear cell proliferation	14			15
GO:0032963	collagen metabolic process									12
GO:0033002	muscle cell proliferation		13
GO:0033043	regulation of organelle organization			12
GO:0033077	T cell differentiation in thymus		10		11				9
GO:0033275	actin-myosin filament sliding					11
GO:0033280	response to vitamin D							5
GO:0033344	cholesterol efflux							6
GO:0033673	negative regulation of kinase activity	19
GO:0034220	ion transmembrane transport									41
GO:0034311	diol metabolic process		8			10
GO:0034340	response to type I interferon	13
GO:0034341	response to interferon-gamma	16									24
GO:0034375	high-density lipoprotein particle remodeling							4
GO:0034440	lipid oxidation			6
GO:0034614	cellular response to reactive oxygen species							7
GO:0034622	cellular macromolecular complex assembly										86
GO:0034637	cellular carbohydrate biosynthetic process							15
GO:0034641	cellular nitrogen compound metabolic process	505			559
GO:0034645	cellular macromolecule biosynthetic process	379
GO:0034655	nucleobase, nucleoside, nucleotide and nucleic acid catabolic process										81
GO:0034656	nucleobase, nucleoside and nucleotide catabolic process										81
GO:0034762	regulation of transmembrane transport		22			27
GO:0034763	negative regulation of transmembrane transport	8
GO:0034765	regulation of ion transmembrane transport									15
GO:0035051	cardiac cell differentiation	9
GO:0035148	tube formation				14					17
GO:0035150	regulation of tube size		16							19
GO:0035176	social behavior					7
GO:0035239	tube morphogenesis		27			34			25
GO:0035249	synaptic transmission, glutamatergic					8
GO:0035264	multicellular organism growth					17				18
GO:0035295	tube development					45
GO:0035567	non-canonical Wnt receptor signaling pathway		9		9	11
GO:0040007	growth					87		42		88
GO:0040008	regulation of growth	50	50			61		34	44
GO:0040011	locomotion			28		134				140
GO:0040013	negative regulation of locomotion							12
GO:0040014	regulation of multicellular organism growth									15
GO:0040017	positive regulation of locomotion							15
GO:0042035	regulation of cytokine biosynthetic process				16
GO:0042044	fluid transport				9	11
GO:0042088	T-helper 1 type immune response			3
GO:0042089	cytokine biosynthetic process	18			17
GO:0042094	interleukin-2 biosynthetic process					8
GO:0042100	B cell proliferation	10			12
GO:0042107	cytokine metabolic process	18			17
GO:0042108	positive regulation of cytokine biosynthetic process	12			12
GO:0042127	regulation of cell proliferation	103			113				90
GO:0042157	lipoprotein metabolic process				18
GO:0042221	response to chemical stimulus					279				289
GO:0042255	ribosome assembly	5
GO:0042273	ribosomal large subunit biogenesis	5
GO:0042274	ribosomal small subunit biogenesis								5
GO:0042303	molting cycle									14
GO:0042310	vasoconstriction									12
GO:0042311	vasodilation	9
GO:0042325	regulation of phosphorylation							45
GO:0042326	negative regulation of phosphorylation							9
GO:0042391	regulation of membrane potential					27				30
GO:0042446	hormone biosynthetic process					17				18
GO:0042471	ear morphogenesis					17
GO:0042472	inner ear morphogenesis					17
GO:0042476	odontogenesis									17
GO:0042481	regulation of odontogenesis									6
GO:0042537	benzene-containing compound metabolic process					14
GO:0042592	homeostatic process					124				135
GO:0042596	fear response				5	6
GO:0042633	hair cycle									14
GO:0042730	fibrinolysis		6			7
GO:0042745	circadian sleep/wake cycle		6							6
GO:0042749	regulation of circadian sleep/wake cycle									6
GO:0042752	regulation of circadian rhythm		7							8
GO:0042755	eating behavior									9
GO:0042981	regulation of apoptosis	114		29	122
GO:0043009	chordate embryonic development		45
GO:0043038	amino acid activation										14
GO:0043039	tRNA aminoacylation										14
GO:0043065	positive regulation of apoptosis								57		91
GO:0043066	negative regulation of apoptosis							36			83
GO:0043067	regulation of programmed cell death	114		29	123
GO:0043068	positive regulation of programmed cell death								58		91
GO:0043069	negative regulation of programmed cell death							36			84
GO:0043086	negative regulation of catalytic activity							33
GO:0043154	negative regulation of caspase activity							5
GO:0043170	macromolecule metabolic process				708
GO:0043193	positive regulation of gene-specific transcription				32
GO:0043266	regulation of potassium ion transport									6
GO:0043270	positive regulation of ion transport		12			13				14
GO:0043271	negative regulation of ion transport					9
GO:0043278	response to morphine									6
GO:0043279	response to alkaloid									14
GO:0043434	response to peptide hormone stimulus					53
GO:0043543	protein acylation										25
GO:0043567	regulation of insulin-like growth factor receptor signaling pathway		5					4		6
GO:0043574	peroxisomal transport	6			6
GO:0043588	skin development							6
GO:0043648	dicarboxylic acid metabolic process										13
GO:0043687	post-translational protein modification										37
GO:0043691	reverse cholesterol transport							5
GO:0043900	regulation of multi-organism process					19					21
GO:0043933	macromolecular complex subunit organization	104
GO:0043966	histone H3 acetylation										13
GO:0043967	histone H4 acetylation										11
GO:0044042	glucan metabolic process							8
GO:0044085	cellular component biogenesis										217
GO:0044092	negative regulation of molecular function							39
GO:0044236	multicellular organismal metabolic process									15
GO:0044243	multicellular organismal catabolic process									9
GO:0044259	multicellular organismal macromolecule metabolic process									13
GO:0044262	cellular carbohydrate metabolic process							37
GO:0044267	cellular protein metabolic process				318
GO:0044271	cellular nitrogen compound biosynthetic process						41
GO:0044281	small molecule metabolic process							128			336
GO:0044282	small molecule catabolic process										123
GO:0044283	small molecule biosynthetic process						49
GO:0044419	interspecies interaction between organisms			14
GO:0045058	T cell selection		6
GO:0045061	thymic T cell selection					6
GO:0045069	regulation of viral genome replication				6
GO:0045086	positive regulation of interleukin-2 biosynthetic process	5			5	6
GO:0045124	regulation of bone resorption			3
GO:0045165	cell fate commitment									29
GO:0045185	maintenance of protein location			6
GO:0045187	regulation of circadian sleep/wake cycle, sleep									6
GO:0045454	cell redox homeostasis			5
GO:0045595	regulation of cell differentiation					95			67	99
GO:0045596	negative regulation of cell differentiation						24
GO:0045597	positive regulation of cell differentiation					50		27
GO:0045638	negative regulation of myeloid cell differentiation							6
GO:0045639	positive regulation of myeloid cell differentiation			4				7
GO:0045649	regulation of macrophage differentiation						4
GO:0045664	regulation of neuron differentiation									36
GO:0045666	positive regulation of neuron differentiation									10
GO:0045761	regulation of adenylate cyclase activity		18						16
GO:0045762	positive regulation of adenylate cyclase activity					15
GO:0045765	regulation of angiogenesis							12
GO:0045766	positive regulation of angiogenesis							8
GO:0045776	negative regulation of blood pressure		7
GO:0045884	regulation of survival gene product expression			3
GO:0045907	positive regulation of vasoconstriction									7
GO:0045909	positive regulation of vasodilation		5
GO:0045926	negative regulation of growth							15
GO:0045927	positive regulation of growth	18	17		18	20				21
GO:0045936	negative regulation of phosphate metabolic process							9
GO:0045944	positive regulation of transcription from RNA polymerase II promoter		55
GO:0045981	positive regulation of nucleotide metabolic process					9
GO:0045995	regulation of embryonic development	9
GO:0046058	cAMP metabolic process		20
GO:0046131	pyrimidine ribonucleoside metabolic process							5
GO:0046134	pyrimidine nucleoside biosynthetic process							4
GO:0046164	alcohol catabolic process							13
GO:0046364	monosaccharide biosynthetic process							9
GO:0046626	regulation of insulin receptor signaling pathway							5
GO:0046649	lymphocyte activation					57
GO:0046651	lymphocyte proliferation	20			22
GO:0046676	negative regulation of insulin secretion		6
GO:0046697	decidualization							4
GO:0046782	regulation of viral transcription										17
GO:0046850	regulation of bone remodeling			3
GO:0046879	hormone secretion					31
GO:0046903	secretion							50
GO:0048009	insulin-like growth factor receptor signaling pathway							6
GO:0048048	embryonic eye morphogenesis		5
GO:0048167	regulation of synaptic plasticity		10
GO:0048168	regulation of neuronal synaptic plasticity		7
GO:0048169	regulation of long-term neuronal synaptic plasticity									6
GO:0048259	regulation of receptor-mediated endocytosis							5
GO:0048265	response to pain		6			7
GO:0048332	mesoderm morphogenesis		9			11				11
GO:0048468	cell development		110			144				151
GO:0048483	autonomic nervous system development							6
GO:0048489	synaptic vesicle transport			4
GO:0048512	circadian behavior		6
GO:0048513	organ development							115
GO:0048518	positive regulation of biological process								244		428
GO:0048521	negative regulation of behavior		6
GO:0048522	positive regulation of cellular process								218		386
GO:0048534	hemopoietic or lymphoid organ development		43	14
GO:0048545	response to steroid hormone stimulus							25
GO:0048546	digestive tract morphogenesis		9
GO:0048562	embryonic organ morphogenesis								21
GO:0048583	regulation of response to stimulus							113
GO:0048584	positive regulation of response to stimulus	93
GO:0048585	negative regulation of response to stimulus	59
GO:0048634	regulation of muscle organ development	12	11		14				12
GO:0048641	regulation of skeletal muscle tissue development								7
GO:0048644	muscle organ morphogenesis					10
GO:0048646	anatomical structure formation involved in morphogenesis		66							83
GO:0048699	generation of neurons		92
GO:0048706	embryonic skeletal system development		14			17
GO:0048729	tissue morphogenesis		39
GO:0048730	epidermis morphogenesis									8
GO:0048731	system development				318			164
GO:0048738	cardiac muscle tissue development	14
GO:0048839	inner ear development					20
GO:0048856	anatomical structure development							183
GO:0048864	stem cell development								8	11
GO:0048869	cellular developmental process			53
GO:0048870	cell motility					86				91
GO:0048871	multicellular organismal homeostasis								16
GO:0048872	homeostasis of number of cells	19
GO:0048873	homeostasis of number of cells within a tissue	5
GO:0050434	positive regulation of viral transcription										16
GO:0050482	arachidonic acid secretion		5							5
GO:0050671	positive regulation of lymphocyte proliferation	14
GO:0050690	regulation of defense response to virus by virus	7			9
GO:0050767	regulation of neurogenesis					40				44
GO:0050771	negative regulation of axonogenesis									9
GO:0050776	regulation of immune response			16							87
GO:0050778	positive regulation of immune response								39
GO:0050790	regulation of catalytic activity							75
GO:0050792	regulation of viral reproduction										21
GO:0050793	regulation of developmental process	100						62		122
GO:0050794	regulation of cellular process								598
GO:0050795	regulation of behavior							11
GO:0050796	regulation of insulin secretion					22
GO:0050802	circadian sleep/wake cycle, sleep		6							6
GO:0050804	regulation of synaptic transmission					23
GO:0050807	regulation of synapse organization	6							6
GO:0050817	coagulation				66	72
GO:0050818	regulation of coagulation		10
GO:0050819	negative regulation of coagulation		9
GO:0050820	positive regulation of coagulation		5
GO:0050829	defense response to Gram-negative bacterium							4
GO:0050830	defense response to Gram-positive bacterium					9
GO:0050832	defense response to fungus							5
GO:0050848	regulation of calcium-mediated signaling		7		7				6
GO:0050850	positive regulation of calcium-mediated signaling		6		6
GO:0050851	antigen receptor-mediated signaling pathway			7		21
GO:0050852	T cell receptor signaling pathway					18
GO:0050853	B cell receptor signaling pathway				7						9
GO:0050863	regulation of T cell activation					31
GO:0050864	regulation of B cell activation	13
GO:0050865	regulation of cell activation					45					52
GO:0050866	negative regulation of cell activation								12	16
GO:0050870	positive regulation of T cell activation										33
GO:0050877	neurological system process		144
GO:0050878	regulation of body fluid levels				75	84
GO:0050880	regulation of blood vessel size		15
GO:0050886	endocrine process		9
GO:0050891	multicellular organismal water homeostasis					7				8
GO:0050900	leukocyte migration					33			26
GO:0050905	neuromuscular process		11			13				14
GO:0050906	detection of stimulus involved in sensory perception								8
GO:0050908	detection of light stimulus involved in visual perception								4
GO:0050920	regulation of chemotaxis							9
GO:0050954	sensory perception of mechanical stimulus					20				21
GO:0050962	detection of light stimulus involved in sensory perception								4
GO:0050994	regulation of lipid catabolic process									9
GO:0050995	negative regulation of lipid catabolic process									6
GO:0051043	regulation of membrane protein ectodomain proteolysis							4
GO:0051046	regulation of secretion					50				52
GO:0051048	negative regulation of secretion		14			17				19
GO:0051049	regulation of transport					96
GO:0051051	negative regulation of transport					33
GO:0051084	de novo' posttranslational protein folding										15
GO:0051093	negative regulation of developmental process							27	38
GO:0051094	positive regulation of developmental process				57	65		35
GO:0051128	regulation of cellular component organization						55
GO:0051169	nuclear transport										54
GO:0051172	negative regulation of nitrogen compound metabolic process										131
GO:0051174	regulation of phosphorus metabolic process							47
GO:0051179	localization			88
GO:0051216	cartilage development							13		24
GO:0051235	maintenance of location			9
GO:0051239	regulation of multicellular organismal process	136
GO:0051240	positive regulation of multicellular organismal process									54
GO:0051241	negative regulation of multicellular organismal process							21
GO:0051249	regulation of lymphocyte activation					39
GO:0051251	positive regulation of lymphocyte activation					30
GO:0051258	protein polymerization			8			14
GO:0051259	protein oligomerization							20
GO:0051336	regulation of hydrolase activity							41
GO:0051339	regulation of lyase activity		19						18
GO:0051348	negative regulation of transferase activity	20
GO:0051349	positive regulation of lyase activity	12			13				12
GO:0051350	negative regulation of lyase activity					13				15
GO:0051354	negative regulation of oxidoreductase activity				6
GO:0051384	response to glucocorticoid stimulus							13
GO:0051385	response to mineralocorticoid stimulus									8
GO:0051412	response to corticosterone stimulus					7
GO:0051480	cytosolic calcium ion homeostasis								22
GO:0051567	histone H3-K9 methylation								4
GO:0051588	regulation of neurotransmitter transport									9
GO:0051591	response to cAMP						9
GO:0051607	defense response to virus										20
GO:0051674	localization of cell					86				91
GO:0051693	actin filament capping							5
GO:0051704	multi-organism process	98		26	109
GO:0051705	behavioral interaction between organisms									11
GO:0051716	cellular response to stimulus				474	528			375
GO:0051881	regulation of mitochondrial membrane potential			3
GO:0051890	regulation of cardioblast differentiation		5			5
GO:0051899	membrane depolarization					12				13
GO:0051924	regulation of calcium ion transport								17
GO:0051928	positive regulation of calcium ion transport		9
GO:0051937	catecholamine transport		8
GO:0051952	regulation of amine transport		9
GO:0051953	negative regulation of amine transport					5				5
GO:0051960	regulation of nervous system development					46
GO:0051969	regulation of transmission of nerve impulse					24
GO:0051972	regulation of telomerase activity	4
GO:0052547	regulation of peptidase activity							18
GO:0055008	cardiac muscle tissue morphogenesis					10
GO:0055017	cardiac muscle tissue growth		6
GO:0055021	regulation of cardiac muscle tissue growth	5	5
GO:0055024	regulation of cardiac muscle tissue development	5	5
GO:0055065	metal ion homeostasis						Z
GO:0055074	calcium ion homeostasis		32				21
GO:0055080	cation homeostasis						30	29
GO:0055081	anion homeostasis		5
GO:0055082	cellular chemical homeostasis							38
GO:0060026	convergent extension	6			6
GO:0060038	cardiac muscle cell proliferation		6
GO:0060043	regulation of cardiac muscle cell proliferation	5	5
GO:0060070	canonical Wnt receptor signaling pathway		19		22	25				25
GO:0060079	regulation of excitatory postsynaptic membrane potential		6
GO:0060191	regulation of lipase activity									27
GO:0060284	regulation of cell development					48				51
GO:0060333	interferon-gamma-mediated signaling pathway	14
GO:0060337	type I interferon-mediated signaling pathway	13
GO:0060348	bone development									13
GO:0060411	cardiac septum morphogenesis		5
GO:0060415	muscle tissue morphogenesis					10
GO:0060416	response to growth hormone stimulus								5
GO:0060419	heart growth		7
GO:0060420	regulation of heart growth		5
GO:0060445	branching involved in salivary gland morphogenesis					7
GO:0060485	mesenchyme development	17
GO:0060548	negative regulation of cell death							36			86
GO:0060562	epithelial tube morphogenesis		23		28				21
GO:0060571	morphogenesis of an epithelial fold	6
GO:0061035	regulation of cartilage development		7
GO:0061041	regulation of wound healing		11			13
GO:0061371	determination of heart left/right asymmetry					10				9
GO:0065003	macromolecular complex assembly										139
GO:0065007	biological regulation		720	166
GO:0065009	regulation of molecular function							88
GO:0070167	regulation of biomineral tissue development				10
GO:0070206	protein trimerization							5
GO:0070252	actin-mediated cell contraction					11
GO:0070271	protein complex biogenesis			20
GO:0070482	response to oxygen levels							17
GO:0070647	protein modification by small protein conjugation or removal										80
GO:0070661	leukocyte proliferation				24
GO:0070665	positive regulation of leukocyte proliferation	14			15
GO:0070887	cellular response to chemical stimulus							64
GO:0070925	organelle assembly				14						18
GO:0071295	cellular response to vitamin		8
GO:0071299	cellular response to vitamin A		7
GO:0071310	cellular response to organic substance	73			86
GO:0071345	cellular response to cytokine stimulus				36
GO:0071346	cellular response to interferon-gamma	16			16						20
GO:0071357	cellular response to type I interferon	13
GO:0071695	anatomical structure maturation									8
GO:0071705	nitrogen compound transport		28			35
GO:0071822	protein complex subunit organization			22
GO:0071825	protein-lipid complex subunit organization									8
GO:0071827	plasma lipoprotein particle organization									8
GO:0071840	cellular component organization or biogenesis	345			384
GO:0071841	cellular component organization or biogenesis at cellular level	275			305
GO:0071842	cellular component organization at cellular level	265			297
GO:0071843	cellular component biogenesis at cellular level	30
GO:0072175	epithelial tube formation				14					16
GO:0072378	blood coagulation, fibrin clot formation								6
GO:0072503	cellular divalent inorganic cation homeostasis		31
GO:0072507	divalent inorganic cation homeostasis		33				22
GO:0072522	purine-containing compound biosynthetic process					42
GO:0072523	purine-containing compound catabolic process										76
GO:0072528	pyrimidine-containing compound biosynthetic process							6
GO:0072662	protein localization to peroxisome				6
GO:0072663	establishment of protein localization to peroxisome				6
GO:0090087	regulation of peptide transport					24
GO:0090257	regulation of muscle system process									18
GO:0090276	regulation of peptide hormone secretion					24
GO:0090278	negative regulation of peptide hormone secretion		6
GO:0090304	nucleic acid metabolic process				448
GO:0090305	nucleic acid phosphodiester bond hydrolysis										14
GO:2000021	regulation of ion homeostasis		14			16			12	18
GO:2000026	regulation of multicellular organismal development	85					53	51
GO:2000027	regulation of organ morphogenesis	15			17				13	19
GO:2000113	negative regulation of cellular macromolecule biosynthetic process										134
GO:2000146	negative regulation of cell motility						11	11
GO:2000242	negative regulation of reproductive process				8
GO:2000243	positive regulation of reproductive process										18

## Sheet: BP DOWN 3-5
DOWN-REGULATORY GENES ENRICHMENT.SCORE(3,5]
GO.ID	Term	AE-1 vs Con	AE-1 vs Stable	AE-3 vs AE-1	AE-3 vs Con	AE-3 vs Stable	AE-10 vs AE-1	AE-10 vs AE-3	AE-10 vs Con	AE-10 vs Stable	Stable vs Con
GO:0000075	cell cycle checkpoint										51
GO:0000077	DNA damage checkpoint										30
GO:0000082	G1/S transition of mitotic cell cycle										46
GO:0000084	S phase of mitotic cell cycle										34
GO:0000216	M/G1 transition of mitotic cell cycle										25
GO:0000272	polysaccharide catabolic process							9
GO:0000278	mitotic cell cycle										126
GO:0000375	RNA splicing, via transesterification reactions										52
GO:0000377	RNA splicing, via transesterification reactions with bulged adenosine as nucleophile										51
GO:0000398	nuclear mRNA splicing, via spliceosome										51
GO:0001501	skeletal system development						28			59
GO:0001503	ossification						25	25
GO:0001558	regulation of cell growth							23
GO:0001568	blood vessel development							34
GO:0001649	osteoblast differentiation						13	15
GO:0001775	cell activation			24		98
GO:0001816	cytokine production				48
GO:0001817	regulation of cytokine production				45
GO:0001910	regulation of leukocyte mediated cytotoxicity				10				9
GO:0001944	vasculature development							36
GO:0001947	heart looping		11
GO:0001990	regulation of systemic arterial blood pressure by hormone		8
GO:0002009	morphogenesis of an epithelium									48
GO:0002028	regulation of sodium ion transport					10
GO:0002237	response to molecule of bacterial origin							19
GO:0002252	immune effector process				53
GO:0002253	activation of immune response				43						57
GO:0002376	immune system process		154	44
GO:0002456	T cell mediated immunity				10
GO:0002521	leukocyte differentiation				40				35
GO:0002532	production of molecular mediator involved in inflammatory response							5
GO:0002682	regulation of immune system process							59			128
GO:0002694	regulation of leukocyte activation		37						38
GO:0002696	positive regulation of leukocyte activation		32						29
GO:0002703	regulation of leukocyte mediated immunity				16
GO:0002706	regulation of lymphocyte mediated immunity				16
GO:0002757	immune response-activating signal transduction								28
GO:0002764	immune response-regulating signaling pathway								29
GO:0002790	peptide secretion					30
GO:0002819	regulation of adaptive immune response				15
GO:0002822	regulation of adaptive immune response based on somatic recombination of immune receptors built from immunoglobulin superfamily domains				15
GO:0002831	regulation of response to biotic stimulus				17
GO:0003001	generation of a signal involved in cell-cell signaling									50
GO:0003002	regionalization		40			44
GO:0003007	heart morphogenesis					23
GO:0003008	system process		197
GO:0003009	skeletal muscle contraction		8
GO:0003012	muscle system process		39			46				45
GO:0003013	circulatory system process		39			50				51
GO:0003014	renal system process		11							14
GO:0003044	regulation of systemic arterial blood pressure mediated by a chemical signal		10
GO:0003073	regulation of systemic arterial blood pressure		14
GO:0003143	embryonic heart tube morphogenesis		11
GO:0005996	monosaccharide metabolic process							26
GO:0006006	glucose metabolic process							20
GO:0006007	glucose catabolic process						11
GO:0006119	oxidative phosphorylation										22
GO:0006171	cAMP biosynthetic process					28
GO:0006325	chromatin organization										94
GO:0006350	transcription										500
GO:0006368	transcription elongation from RNA polymerase II promoter										20
GO:0006414	translational elongation	42
GO:0006417	regulation of translation										40
GO:0006457	protein folding										48
GO:0006464	protein modification process										352
GO:0006475	internal protein amino acid acetylation										23
GO:0006476	protein deacetylation										13
GO:0006508	proteolysis							66
GO:0006511	ubiquitin-dependent protein catabolic process										77
GO:0006626	protein targeting to mitochondrion										15
GO:0006812	cation transport		81			101
GO:0006814	sodium ion transport		27			29
GO:0006816	calcium ion transport		30			39				39
GO:0006820	anion transport									30
GO:0006833	water transport									14
GO:0006836	neurotransmitter transport									29
GO:0006873	cellular ion homeostasis					76	38			79
GO:0006874	cellular calcium ion homeostasis					39				40
GO:0006875	cellular metal ion homeostasis					50				51
GO:0006887	exocytosis						26
GO:0006891	intra-Golgi vesicle-mediated transport										9
GO:0006898	receptor-mediated endocytosis							13
GO:0006915	apoptosis						89	96
GO:0006916	anti-apoptosis										56
GO:0006917	induction of apoptosis				60						81
GO:0006928	cellular component movement						59
GO:0006935	chemotaxis						44	47
GO:0006936	muscle contraction					45				43
GO:0006937	regulation of muscle contraction		18			20
GO:0006939	smooth muscle contraction		15
GO:0006941	striated muscle contraction		13			17
GO:0006942	regulation of striated muscle contraction					9
GO:0006952	defense response				121		72
GO:0006954	inflammatory response						32
GO:0006955	immune response		108	32
GO:0006968	cellular defense response		13							17
GO:0006979	response to oxidative stress							21
GO:0007031	peroxisome organization				10
GO:0007049	cell cycle										214
GO:0007154	cell communication					240				244
GO:0007160	cell-matrix adhesion						16
GO:0007165	signal transduction				412	470			330
GO:0007186	G-protein coupled receptor protein signaling pathway								68
GO:0007187	G-protein signaling, coupled to cyclic nucleotide second messenger		27						22
GO:0007188	G-protein signaling, coupled to cAMP nucleotide second messenger		20						19
GO:0007189	activation of adenylate cyclase activity by G-protein signaling pathway									14
GO:0007190	activation of adenylate cyclase activity					15				18
GO:0007193	inhibition of adenylate cyclase activity by G-protein signaling pathway									14
GO:0007200	activation of phospholipase C activity by G-protein coupled receptor protein signaling pathway coupled to IP3 second messenger									16
GO:0007204	elevation of cytosolic calcium ion concentration		24			30				31
GO:0007223	Wnt receptor signaling pathway, calcium modulating pathway									9
GO:0007268	synaptic transmission		62			79
GO:0007270	nerve-nerve synaptic transmission									17
GO:0007271	synaptic transmission, cholinergic									8
GO:0007274	neuromuscular synaptic transmission					7
GO:0007275	multicellular organismal development						204
GO:0007346	regulation of mitotic cell cycle										56
GO:0007389	pattern specification process		52							62
GO:0007399	nervous system development		156
GO:0007417	central nervous system development		62							81
GO:0007423	sensory organ development									57
GO:0007492	endoderm development		10
GO:0007565	female pregnancy						17	17
GO:0007568	aging							20
GO:0007596	blood coagulation						43		61
GO:0007599	hemostasis						44		62
GO:0007601	visual perception									42
GO:0007608	sensory perception of smell									81
GO:0007610	behavior		51			61
GO:0007611	learning or memory									26
GO:0007612	learning									18
GO:0007623	circadian rhythm		15
GO:0007631	feeding behavior		17			20
GO:0008015	blood circulation		39			50				51
GO:0008219	cell death						95	102
GO:0008283	cell proliferation							88
GO:0008284	positive regulation of cell proliferation		66
GO:0008285	negative regulation of cell proliferation							36
GO:0008306	associative learning									11
GO:0008542	visual learning									9
GO:0008544	epidermis development					41
GO:0008624	induction of apoptosis by extracellular signals										31
GO:0009058	biosynthetic process	471
GO:0009109	coenzyme catabolic process										13
GO:0009123	nucleoside monophosphate metabolic process					38				41
GO:0009124	nucleoside monophosphate biosynthetic process					35				38
GO:0009190	cyclic nucleotide biosynthetic process		24
GO:0009582	detection of abiotic stimulus									17
GO:0009605	response to external stimulus						76
GO:0009607	response to biotic stimulus						47
GO:0009611	response to wounding								101
GO:0009615	response to virus				36						46
GO:0009653	anatomical structure morphogenesis						102
GO:0009790	embryo development									108
GO:0009792	embryo development ending in birth or egg hatching									69
GO:0009888	tissue development						71	69
GO:0009892	negative regulation of metabolic process										195
GO:0009913	epidermal cell differentiation		18			21
GO:0009952	anterior/posterior pattern formation		26							35
GO:0010033	response to organic substance						86	84
GO:0010467	gene expression	411
GO:0010498	proteasomal protein catabolic process										49
GO:0010517	regulation of phospholipase activity									25
GO:0010518	positive regulation of phospholipase activity									25
GO:0010564	regulation of cell cycle process										71
GO:0010578	regulation of adenylate cyclase activity involved in G-protein signaling pathway									14
GO:0010579	positive regulation of adenylate cyclase activity by G-protein signaling pathway									14
GO:0010605	negative regulation of macromolecule metabolic process										183
GO:0010608	posttranscriptional regulation of gene expression										60
GO:0010648	negative regulation of cell communication		55
GO:0010817	regulation of hormone levels		47
GO:0010941	regulation of cell death							75
GO:0010942	positive regulation of cell death				79
GO:0010959	regulation of metal ion transport		25							31
GO:0012501	programmed cell death						89	96
GO:0012502	induction of programmed cell death				60						81
GO:0014812	muscle cell migration							8
GO:0014909	smooth muscle cell migration						7	6
GO:0014910	regulation of smooth muscle cell migration						6	6
GO:0014911	positive regulation of smooth muscle cell migration								5
GO:0015672	monovalent inorganic cation transport		48							61
GO:0015711	organic anion transport									19
GO:0015833	peptide transport					35
GO:0015837	amine transport									34
GO:0015844	monoamine transport									14
GO:0015849	organic acid transport		33			40				41
GO:0015850	organic alcohol transport									17
GO:0016032	viral reproduction								53
GO:0016052	carbohydrate catabolic process						20
GO:0016202	regulation of striated muscle tissue development				14
GO:0016265	death						95	102
GO:0016558	protein import into peroxisome matrix				6
GO:0016570	histone modification										45
GO:0016573	histone acetylation										23
GO:0017038	protein import										46
GO:0018149	peptide cross-linking							7
GO:0018205	peptidyl-lysine modification										27
GO:0018393	internal peptidyl-lysine acetylation										23
GO:0018394	peptidyl-lysine acetylation										23
GO:0019226	transmission of nerve impulse		70			89
GO:0019318	hexose metabolic process							26
GO:0019320	hexose catabolic process						13	13
GO:0019725	cellular homeostasis						48	46		90
GO:0019827	stem cell maintenance									11
GO:0019835	cytolysis				9	9
GO:0019882	antigen processing and presentation				16
GO:0019932	second-messenger-mediated signaling					59			42
GO:0019933	cAMP-mediated signaling					28			20
GO:0019935	cyclic-nucleotide-mediated signaling		27			36
GO:0019941	modification-dependent protein catabolic process										77
GO:0020027	hemoglobin metabolic process			3			4
GO:0021517	ventral spinal cord development								7
GO:0021522	spinal cord motor neuron differentiation								6
GO:0021953	central nervous system neuron differentiation		16			21				21
GO:0022008	neurogenesis					133				139
GO:0022402	cell cycle process										162
GO:0022618	ribonucleoprotein complex assembly										26
GO:0022898	regulation of transmembrane transporter activity		14			18
GO:0023052	signaling	407							364
GO:0023057	negative regulation of signaling		55
GO:0023061	signal release									50
GO:0030003	cellular cation homeostasis					55
GO:0030072	peptide hormone secretion					30
GO:0030097	hemopoiesis										68
GO:0030098	lymphocyte differentiation				32
GO:0030147	natriuresis		6							7
GO:0030154	cell differentiation						136	135
GO:0030163	protein catabolic process										86
GO:0030168	platelet activation						27
GO:0030182	neuron differentiation					117				122
GO:0030193	regulation of blood coagulation					13
GO:0030195	negative regulation of blood coagulation					11
GO:0030198	extracellular matrix organization							14
GO:0030216	keratinocyte differentiation		18			21
GO:0030217	T cell differentiation								21
GO:0030334	regulation of cell migration						26	25
GO:0030574	collagen catabolic process						7	7
GO:0030595	leukocyte chemotaxis							12
GO:0030799	regulation of cyclic nucleotide metabolic process		23
GO:0030801	positive regulation of cyclic nucleotide metabolic process									12
GO:0030802	regulation of cyclic nucleotide biosynthetic process		23
GO:0030804	positive regulation of cyclic nucleotide biosynthetic process									12
GO:0030808	regulation of nucleotide biosynthetic process		23
GO:0030810	positive regulation of nucleotide biosynthetic process									12
GO:0030814	regulation of cAMP metabolic process					28
GO:0030816	positive regulation of cAMP metabolic process									11
GO:0030817	regulation of cAMP biosynthetic process					28
GO:0030819	positive regulation of cAMP biosynthetic process									11
GO:0030835	negative regulation of actin filament depolymerization						6
GO:0030855	epithelial cell differentiation		35			40
GO:0031099	regeneration							13
GO:0031100	organ regeneration						8
GO:0031145	anaphase-promoting complex-dependent proteasomal ubiquitin-dependent protein catabolic process										26
GO:0031279	regulation of cyclase activity		19			26
GO:0031281	positive regulation of cyclase activity					16				18
GO:0031294	lymphocyte costimulation		17			19			16
GO:0031295	T cell costimulation		17			19			16
GO:0031324	negative regulation of cellular metabolic process										186
GO:0031341	regulation of cell killing				12				11
GO:0031343	positive regulation of cell killing				9				8
GO:0031396	regulation of protein ubiquitination										37
GO:0031570	DNA integrity checkpoint										30
GO:0031589	cell-substrate adhesion							21
GO:0031644	regulation of neurological system process									34
GO:0031670	cellular response to nutrient									13
GO:0032094	response to food									8
GO:0032101	regulation of response to external stimulus							23
GO:0032102	negative regulation of response to external stimulus									21
GO:0032269	negative regulation of cellular protein metabolic process										56
GO:0032272	negative regulation of protein polymerization						8
GO:0032309	icosanoid secretion					8
GO:0032409	regulation of transporter activity		14			18
GO:0032412	regulation of ion transmembrane transporter activity		14							15
GO:0032501	multicellular organismal process							306
GO:0032502	developmental process						227
GO:0032846	positive regulation of homeostatic process									15
GO:0032879	regulation of localization						67	68
GO:0032940	secretion by cell					86	44
GO:0032963	collagen metabolic process						10
GO:0033036	macromolecule localization										249
GO:0033365	protein localization to organelle										62
GO:0033554	cellular response to stress										157
GO:0033555	multicellular organismal response to stress		11			13
GO:0034097	response to cytokine stimulus				50
GO:0034220	ion transmembrane transport					44
GO:0034367	macromolecular complex remodeling						6	6
GO:0034368	protein-lipid complex remodeling						6	6
GO:0034369	plasma lipoprotein particle remodeling						6	6
GO:0034374	low-density lipoprotein particle remodeling						4
GO:0034621	cellular macromolecular complex subunit organization								68
GO:0034765	regulation of ion transmembrane transport		14			18
GO:0035019	somatic stem cell maintenance									8
GO:0035050	embryonic heart tube development		11
GO:0035094	response to nicotine									9
GO:0035176	social behavior									8
GO:0035239	tube morphogenesis									39
GO:0035249	synaptic transmission, glutamatergic		9							11
GO:0035264	multicellular organism growth		18
GO:0035567	non-canonical Wnt receptor signaling pathway									13
GO:0035601	protein deacylation										14
GO:0035637	multicellular organismal signaling		70			89
GO:0040007	growth		78
GO:0040012	regulation of locomotion						28	28
GO:0040014	regulation of multicellular organism growth		16			16
GO:0040018	positive regulation of multicellular organism growth		7
GO:0042060	wound healing						49		68
GO:0042110	T cell activation		39			45					59
GO:0042127	regulation of cell proliferation		104					69
GO:0042254	ribosome biogenesis				28
GO:0042255	ribosome assembly				7				6		8
GO:0042273	ribosomal large subunit biogenesis				6						8
GO:0042274	ribosomal small subunit biogenesis				8
GO:0042312	regulation of vasodilation		8			9
GO:0042330	taxis						44	47
GO:0042445	hormone metabolic process		28
GO:0042446	hormone biosynthetic process		18
GO:0042471	ear morphogenesis									23
GO:0042472	inner ear morphogenesis									21
GO:0042542	response to hydrogen peroxide							11
GO:0042592	homeostatic process							71
GO:0042596	fear response		6							7
GO:0042737	drug catabolic process					6				6
GO:0042742	defense response to bacterium						17	17
GO:0042749	regulation of circadian sleep/wake cycle		6
GO:0042770	signal transduction in response to DNA damage										33
GO:0042773	ATP synthesis coupled electron transport										18
GO:0042775	mitochondrial ATP synthesis coupled electron transport										18
GO:0042981	regulation of apoptosis							72
GO:0043009	chordate embryonic development									68
GO:0043062	extracellular structure organization							21
GO:0043065	positive regulation of apoptosis				78
GO:0043066	negative regulation of apoptosis			20
GO:0043067	regulation of programmed cell death							72
GO:0043068	positive regulation of programmed cell death				79
GO:0043069	negative regulation of programmed cell death			20
GO:0043266	regulation of potassium ion transport		6
GO:0043269	regulation of ion transport		27						23	34
GO:0043412	macromolecule modification										369
GO:0043583	ear development									27
GO:0043632	modification-dependent macromolecule catabolic process										77
GO:0043900	regulation of multi-organism process				21
GO:0044236	multicellular organismal metabolic process						11	11
GO:0044243	multicellular organismal catabolic process						7	7
GO:0044249	cellular biosynthetic process	460
GO:0044257	cellular protein catabolic process										78
GO:0044259	multicellular organismal macromolecule metabolic process						10	11
GO:0044275	cellular carbohydrate catabolic process						15	17
GO:0044283	small molecule biosynthetic process							51
GO:0045058	T cell selection				8	8			7
GO:0045061	thymic T cell selection		6		6				6
GO:0045076	regulation of interleukin-2 biosynthetic process					8
GO:0045187	regulation of circadian sleep/wake cycle, sleep		6
GO:0045321	leukocyte activation		55			66					82
GO:0045595	regulation of cell differentiation						50	50
GO:0045596	negative regulation of cell differentiation									51
GO:0045745	positive regulation of G-protein coupled receptor protein signaling pathway									6
GO:0045761	regulation of adenylate cyclase activity					25
GO:0045762	positive regulation of adenylate cyclase activity									18
GO:0045776	negative regulation of blood pressure									10
GO:0045777	positive regulation of blood pressure		9							11
GO:0045927	positive regulation of growth								18
GO:0045981	positive regulation of nucleotide metabolic process									12
GO:0046058	cAMP metabolic process					30
GO:0046164	alcohol catabolic process						15
GO:0046365	monosaccharide catabolic process						14	13
GO:0046649	lymphocyte activation		49								78
GO:0046697	decidualization						5
GO:0046717	acid secretion		7
GO:0046903	secretion					105	52			111
GO:0046942	carboxylic acid transport		32			39				40
GO:0048016	inositol phosphate-mediated signaling									16
GO:0048167	regulation of synaptic plasticity									15
GO:0048168	regulation of neuronal synaptic plasticity									10
GO:0048265	response to pain									8
GO:0048513	organ development		203		235	249	124
GO:0048514	blood vessel morphogenesis							28
GO:0048518	positive regulation of biological process				317			170
GO:0048519	negative regulation of biological process						156				410
GO:0048522	positive regulation of cellular process				284			152
GO:0048523	negative regulation of cellular process						143	147			380
GO:0048524	positive regulation of viral reproduction										19
GO:0048534	hemopoietic or lymphoid organ development										72
GO:0048562	embryonic organ morphogenesis		27			33
GO:0048568	embryonic organ development		35			42				48
GO:0048583	regulation of response to stimulus		189			236			171
GO:0048584	positive regulation of response to stimulus				112
GO:0048585	negative regulation of response to stimulus		61					42
GO:0048598	embryonic morphogenesis		54			65
GO:0048610	cellular process involved in reproduction								50
GO:0048699	generation of neurons					128				133
GO:0048704	embryonic skeletal system morphogenesis									18
GO:0048705	skeletal system morphogenesis									30
GO:0048706	embryonic skeletal system development									24
GO:0048729	tissue morphogenesis					56
GO:0048731	system development						179
GO:0048839	inner ear development									24
GO:0048856	anatomical structure development						194
GO:0048863	stem cell differentiation									14
GO:0048869	cellular developmental process						138	138
GO:0048878	chemical homeostasis		80			102	49	51
GO:0050432	catecholamine secretion									10
GO:0050433	regulation of catecholamine secretion									10
GO:0050482	arachidonic acid secretion					6
GO:0050688	regulation of defense response to virus				15
GO:0050768	negative regulation of neurogenesis									17
GO:0050776	regulation of immune response		59			76
GO:0050778	positive regulation of immune response										70
GO:0050789	regulation of biological process	734			819				633
GO:0050793	regulation of developmental process		99		114	129	64		92
GO:0050794	regulation of cellular process	698			774
GO:0050801	ion homeostasis		66				42	40
GO:0050804	regulation of synaptic transmission									30
GO:0050817	coagulation						43		61
GO:0050818	regulation of coagulation					13
GO:0050819	negative regulation of coagulation					11
GO:0050852	T cell receptor signaling pathway								19
GO:0050853	B cell receptor signaling pathway								7
GO:0050854	regulation of antigen receptor-mediated signaling pathway										8
GO:0050856	regulation of T cell receptor signaling pathway										7
GO:0050863	regulation of T cell activation		28						30		43
GO:0050865	regulation of cell activation		39
GO:0050867	positive regulation of cell activation		32						29
GO:0050870	positive regulation of T cell activation		24						25
GO:0050877	neurological system process					194
GO:0050878	regulation of body fluid levels						48		69	89
GO:0050879	multicellular organismal movement									9
GO:0050881	musculoskeletal movement									9
GO:0050890	cognition									28
GO:0050896	response to stimulus		589			769			547
GO:0050900	leukocyte migration						20
GO:0050953	sensory perception of light stimulus									42
GO:0051050	positive regulation of transport							29
GO:0051093	negative regulation of developmental process						31			61
GO:0051128	regulation of cellular component organization							62
GO:0051179	localization							219
GO:0051187	cofactor catabolic process										13
GO:0051216	cartilage development		23
GO:0051239	regulation of multicellular organismal process				161		86	84	127	184
GO:0051240	positive regulation of multicellular organismal process		48		50	58			41
GO:0051248	negative regulation of protein metabolic process										56
GO:0051249	regulation of lymphocyte activation		35								51
GO:0051251	positive regulation of lymphocyte activation		30						28
GO:0051270	regulation of cellular component movement						29	29
GO:0051271	negative regulation of cellular component movement						12	12
GO:0051276	chromosome organization										116
GO:0051320	S phase										37
GO:0051329	interphase of mitotic cell cycle										76
GO:0051339	regulation of lyase activity					26
GO:0051340	regulation of ligase activity										29
GO:0051346	negative regulation of hydrolase activity							16
GO:0051349	positive regulation of lyase activity					16				18
GO:0051412	response to corticosterone stimulus									8
GO:0051438	regulation of ubiquitin-protein ligase activity										27
GO:0051439	regulation of ubiquitin-protein ligase activity involved in mitotic cell cycle										26
GO:0051443	positive regulation of ubiquitin-protein ligase activity										26
GO:0051480	cytosolic calcium ion homeostasis		25			32				32
GO:0051588	regulation of neurotransmitter transport		8			9
GO:0051591	response to cAMP							10
GO:0051603	proteolysis involved in cellular protein catabolic process										77
GO:0051607	defense response to virus				21
GO:0051641	cellular localization										249
GO:0051649	establishment of localization in cell										231
GO:0051693	actin filament capping						6
GO:0051704	multi-organism process						68				163
GO:0051707	response to other organism						41
GO:0051716	cellular response to stimulus	429	426
GO:0051924	regulation of calcium ion transport		21			27				25
GO:0051925	regulation of calcium ion transport via voltage-gated calcium channel activity		11							13
GO:0051937	catecholamine transport									12
GO:0051952	regulation of amine transport					12				13
GO:0051960	regulation of nervous system development									49
GO:0051966	regulation of synaptic transmission, glutamatergic									8
GO:0051969	regulation of transmission of nerve impulse									33
GO:0055065	metal ion homeostasis		41			53				55
GO:0055074	calcium ion homeostasis					42				42
GO:0055080	cation homeostasis		48			61				62
GO:0055082	cellular chemical homeostasis		59			77	38			80
GO:0055085	transmembrane transport		107
GO:0060026	convergent extension		6
GO:0060193	positive regulation of lipase activity									26
GO:0060326	cell chemotaxis							13
GO:0060429	epithelium development		58			70
GO:0060548	negative regulation of cell death			20
GO:0060562	epithelial tube morphogenesis					31				33
GO:0061371	determination of heart left/right asymmetry		11
GO:0065007	biological regulation							436	677
GO:0065008	regulation of biological quality		225	66		295			216
GO:0070585	protein localization in mitochondrion										15
GO:0070838	divalent metal ion transport		34			43				42
GO:0071156	regulation of cell cycle arrest										52
GO:0071295	cellular response to vitamin									13
GO:0071299	cellular response to vitamin A									11
GO:0071300	cellular response to retinoic acid									10
GO:0071702	organic substance transport					79				82
GO:0071705	nitrogen compound transport									42
GO:0071715	icosanoid transport					8
GO:0071825	protein-lipid complex subunit organization						7	7
GO:0071826	ribonucleoprotein complex subunit organization										27
GO:0071827	plasma lipoprotein particle organization						7	7
GO:0071843	cellular component biogenesis at cellular level				36
GO:0072358	cardiovascular system development							45
GO:0072359	circulatory system development							45
GO:0072503	cellular divalent inorganic cation homeostasis					42	22			42
GO:0072507	divalent inorganic cation homeostasis					45				44
GO:0072511	divalent inorganic cation transport		34			43				42
GO:0072655	establishment of protein localization in mitochondrion										15
GO:0090066	regulation of anatomical structure size							39
GO:0090068	positive regulation of cell cycle process										30
GO:0090257	regulation of muscle system process					21
GO:0090304	nucleic acid metabolic process	405
GO:2000026	regulation of multicellular organismal development		84		99	110			78
GO:2000145	regulation of cell motility						26	25

## Sheet: BP DOWN 5-
DOWN-REGULATORY GENES ENRICHMENT.SCORE>5
GO.ID	Term	AE-1 vs Con	AE-1 vs Stable	AE-3 vs AE-1	AE-3 vs Con	AE-3 vs Stable	AE-10 vs AE-1	AE-10 vs AE-3	AE-10 vs Con	AE-10 vs Stable	Stable vs Con
GO:0000003	reproduction				143				120		196
GO:0000302	response to reactive oxygen species							16
GO:0001775	cell activation				103				83
GO:0002376	immune system process				228	205	102	122	176		257
GO:0002429	immune response-activating cell surface receptor signaling pathway				32				25		43
GO:0002520	immune system development				66				54
GO:0002576	platelet degranulation						15
GO:0002682	regulation of immune system process				121				90
GO:0002684	positive regulation of immune system process				75
GO:0002694	regulation of leukocyte activation				49
GO:0002696	positive regulation of leukocyte activation				41
GO:0002697	regulation of immune effector process				35
GO:0002757	immune response-activating signal transduction				41						54
GO:0002764	immune response-regulating signaling pathway				42						54
GO:0002768	immune response-regulating cell surface receptor signaling pathway				33				26		43
GO:0003002	regionalization									52
GO:0003008	system process					261				323
GO:0003009	skeletal muscle contraction					10
GO:0006091	generation of precursor metabolites and energy										96
GO:0006099	tricarboxylic acid cycle										13
GO:0006139	nucleobase, nucleoside, nucleotide and nucleic acid metabolic process										841
GO:0006171	cAMP biosynthetic process									34
GO:0006350	transcription				366
GO:0006364	rRNA processing										32
GO:0006396	RNA processing										160
GO:0006397	mRNA processing										90
GO:0006412	translation				84						177
GO:0006414	translational elongation	42			54				33		76
GO:0006415	translational termination				47				31		70
GO:0006521	regulation of cellular amino acid metabolic process										22
GO:0006605	protein targeting										70
GO:0006807	nitrogen compound metabolic process										912
GO:0006811	ion transport		119			153				171
GO:0006812	cation transport									112
GO:0006839	mitochondrial transport										29
GO:0006886	intracellular protein transport										106
GO:0006915	apoptosis										249
GO:0006928	cellular component movement							72
GO:0006936	muscle contraction		38
GO:0006950	response to stress						173	196
GO:0006952	defense response							85
GO:0006954	inflammatory response							42
GO:0006955	immune response				164	148		74	119		175
GO:0006968	cellular defense response				21	19			18
GO:0006974	response to DNA damage stimulus										109
GO:0006977	DNA damage response, signal transduction by p53 class mediator resulting in cell cycle arrest										26
GO:0006996	organelle organization										301
GO:0007050	cell cycle arrest										78
GO:0007093	mitotic cell cycle checkpoint										37
GO:0007154	cell communication		195
GO:0007155	cell adhesion							79
GO:0007165	signal transduction		379
GO:0007166	cell surface receptor linked signaling pathway		243		250	308			206	290
GO:0007186	G-protein coupled receptor protein signaling pathway		90			117				132
GO:0007187	G-protein signaling, coupled to cyclic nucleotide second messenger					35				42
GO:0007188	G-protein signaling, coupled to cAMP nucleotide second messenger					27				32
GO:0007218	neuropeptide signaling pathway		22			26				30
GO:0007267	cell-cell signaling		113			139				160
GO:0007268	synaptic transmission									93
GO:0007275	multicellular organismal development		367			468			332	476
GO:0007399	nervous system development					208				214
GO:0007588	excretion									21
GO:0007596	blood coagulation							47
GO:0007599	hemostasis							48
GO:0007600	sensory perception									153
GO:0007606	sensory perception of chemical stimulus									89
GO:0007610	behavior									75
GO:0007631	feeding behavior									23
GO:0008104	protein localization										219
GO:0008152	metabolic process										1478
GO:0008217	regulation of blood pressure		27			29				30
GO:0008219	cell death										264
GO:0008380	RNA splicing										72
GO:0008544	epidermis development									58
GO:0009056	catabolic process										299
GO:0009057	macromolecule catabolic process										137
GO:0009058	biosynthetic process				549						820
GO:0009059	macromolecule biosynthetic process				461						672
GO:0009060	aerobic respiration										16
GO:0009187	cyclic nucleotide metabolic process					37				40
GO:0009190	cyclic nucleotide biosynthetic process					35				38
GO:0009605	response to external stimulus							84
GO:0009607	response to biotic stimulus							54
GO:0009611	response to wounding						78	95
GO:0009617	response to bacterium						30	34
GO:0009887	organ morphogenesis									108
GO:0009888	tissue development		118			149				168
GO:0009913	epidermal cell differentiation									29
GO:0009987	cellular process										1904
GO:0010467	gene expression				464						729
GO:0010941	regulation of cell death										194
GO:0010959	regulation of metal ion transport					33
GO:0012501	programmed cell death										249
GO:0014812	muscle cell migration						9
GO:0015031	protein transport										189
GO:0015980	energy derivation by oxidation of organic compounds										74
GO:0015985	energy coupled proton transport, down electrochemical gradient										12
GO:0015986	ATP synthesis coupled proton transport										12
GO:0016032	viral reproduction				89						169
GO:0016043	cellular component organization										559
GO:0016052	carbohydrate catabolic process							22
GO:0016070	RNA metabolic process										509
GO:0016071	mRNA metabolic process										135
GO:0016072	rRNA metabolic process										33
GO:0016265	death										264
GO:0016477	cell migration						52	63
GO:0019058	viral infectious cycle				66				41		106
GO:0019080	viral genome expression				56				35		87
GO:0019083	viral transcription				56				35		87
GO:0019226	transmission of nerve impulse									103
GO:0019538	protein metabolic process										625
GO:0019932	second-messenger-mediated signaling									67
GO:0019933	cAMP-mediated signaling									34
GO:0019935	cyclic-nucleotide-mediated signaling									44
GO:0022411	cellular component disassembly				60				44		95
GO:0022414	reproductive process				143				120		195
GO:0022415	viral reproductive process				69				41		112
GO:0022610	biological adhesion							79
GO:0022613	ribonucleoprotein complex biogenesis										62
GO:0022900	electron transport chain										45
GO:0022904	respiratory electron transport chain										42
GO:0023052	signaling		419			521
GO:0030001	metal ion transport		76			94				103
GO:0030097	hemopoiesis				58				49
GO:0030098	lymphocyte differentiation								29
GO:0030154	cell differentiation		250			314			216	320
GO:0030199	collagen fibril organization						9	9
GO:0030216	keratinocyte differentiation									27
GO:0030217	T cell differentiation				26
GO:0030330	DNA damage response, signal transduction by p53 class mediator										32
GO:0030799	regulation of cyclic nucleotide metabolic process					32				37
GO:0030802	regulation of cyclic nucleotide biosynthetic process					32				36
GO:0030808	regulation of nucleotide biosynthetic process					32				36
GO:0030814	regulation of cAMP metabolic process									35
GO:0030817	regulation of cAMP biosynthetic process									34
GO:0030855	epithelial cell differentiation									55
GO:0031016	pancreas development				51				34		69
GO:0031018	endocrine pancreas development				49				33		69
GO:0031279	regulation of cyclase activity									29
GO:0031294	lymphocyte costimulation				22
GO:0031295	T cell costimulation				22
GO:0031397	negative regulation of protein ubiquitination										33
GO:0031400	negative regulation of protein modification process										44
GO:0031424	keratinization		14			16				21
GO:0031571	mitotic cell cycle G1/S transition DNA damage checkpoint										26
GO:0031575	mitotic cell cycle G1/S transition checkpoint										27
GO:0031589	cell-substrate adhesion						22
GO:0032412	regulation of ion transmembrane transporter activity					18
GO:0032501	multicellular organismal process		546			717	331		498	784
GO:0032502	developmental process		390			498			360	510
GO:0032963	collagen metabolic process							11
GO:0032984	macromolecular complex disassembly				54				39		81
GO:0033238	regulation of cellular amine metabolic process										24
GO:0033555	multicellular organismal response to stress									14
GO:0034470	ncRNA processing										56
GO:0034613	cellular protein localization										120
GO:0034621	cellular macromolecular complex subunit organization				103						160
GO:0034623	cellular macromolecular complex disassembly				54				39		81
GO:0034641	cellular nitrogen compound metabolic process										899
GO:0034645	cellular macromolecule biosynthetic process				446						662
GO:0034660	ncRNA metabolic process										75
GO:0035270	endocrine system development				55				38		72
GO:0035637	multicellular organismal signaling									103
GO:0040011	locomotion						81	91
GO:0042044	fluid transport									15
GO:0042060	wound healing							56
GO:0042110	T cell activation				54				41
GO:0042221	response to chemical stimulus						156	155
GO:0042254	ribosome biogenesis										45
GO:0042274	ribosomal small subunit biogenesis										11
GO:0042592	homeostatic process						74
GO:0042776	mitochondrial ATP synthesis coupled proton transport										10
GO:0042981	regulation of apoptosis										193
GO:0043067	regulation of programmed cell death										193
GO:0043161	proteasomal ubiquitin-dependent protein catabolic process										49
GO:0043170	macromolecule metabolic process										1139
GO:0043241	protein complex disassembly				53				38		78
GO:0043269	regulation of ion transport					36
GO:0043624	cellular protein complex disassembly				53				38		78
GO:0043933	macromolecular complex subunit organization				137						213
GO:0044057	regulation of system process		55			62				67
GO:0044237	cellular metabolic process										1378
GO:0044238	primary metabolic process										1350
GO:0044248	cellular catabolic process										257
GO:0044249	cellular biosynthetic process				537						806
GO:0044260	cellular macromolecule metabolic process										1081
GO:0044265	cellular macromolecule catabolic process										118
GO:0044267	cellular protein metabolic process										587
GO:0044419	interspecies interaction between organisms										88
GO:0045184	establishment of protein localization										195
GO:0045321	leukocyte activation				78				58
GO:0045333	cellular respiration										54
GO:0045761	regulation of adenylate cyclase activity									29
GO:0045786	negative regulation of cell cycle										91
GO:0046058	cAMP metabolic process									36
GO:0046356	acetyl-CoA catabolic process										13
GO:0046649	lymphocyte activation				72				55
GO:0046907	intracellular transport										177
GO:0048513	organ development								204	277
GO:0048519	negative regulation of biological process							162
GO:0048534	hemopoietic or lymphoid organ development				62				53
GO:0048562	embryonic organ morphogenesis									41
GO:0048583	regulation of response to stimulus				228
GO:0048598	embryonic morphogenesis									76
GO:0048610	cellular process involved in reproduction				73						107
GO:0048729	tissue morphogenesis									65
GO:0048731	system development		302			385			284	401
GO:0048856	anatomical structure development		332			424			306	433
GO:0048869	cellular developmental process		250			315			216	321
GO:0048870	cell motility						55	64
GO:0048878	chemical homeostasis									109
GO:0050776	regulation of immune response				89				66
GO:0050778	positive regulation of immune response				57
GO:0050801	ion homeostasis					85				90
GO:0050817	coagulation							47
GO:0050851	antigen receptor-mediated signaling pathway				32				25		39
GO:0050852	T cell receptor signaling pathway				26						32
GO:0050863	regulation of T cell activation				38
GO:0050865	regulation of cell activation				52				41
GO:0050867	positive regulation of cell activation				41
GO:0050870	positive regulation of T cell activation				33
GO:0050877	neurological system process									249
GO:0050878	regulation of body fluid levels							54
GO:0050879	multicellular organismal movement		11			13
GO:0050881	musculoskeletal movement		11			13
GO:0050896	response to stimulus						375	393		828
GO:0050900	leukocyte migration							29
GO:0051239	regulation of multicellular organismal process		151			188
GO:0051249	regulation of lymphocyte activation				48				37
GO:0051251	positive regulation of lymphocyte activation				40
GO:0051325	interphase										78
GO:0051339	regulation of lyase activity									29
GO:0051351	positive regulation of ligase activity										28
GO:0051352	negative regulation of ligase activity										26
GO:0051436	negative regulation of ubiquitin-protein ligase activity involved in mitotic cell cycle										26
GO:0051437	positive regulation of ubiquitin-protein ligase activity involved in mitotic cell cycle										25
GO:0051444	negative regulation of ubiquitin-protein ligase activity										26
GO:0051674	localization of cell						55	64
GO:0051704	multi-organism process							73
GO:0051707	response to other organism							45
GO:0051726	regulation of cell cycle										123
GO:0051925	regulation of calcium ion transport via voltage-gated calcium channel activity					16
GO:0055085	transmembrane transport					145				154
GO:0060429	epithelium development									90
GO:0065007	biological regulation	780			874
GO:0065008	regulation of biological quality						165	176		318
GO:0070727	cellular macromolecule localization										120
GO:0071158	positive regulation of cell cycle arrest										26
GO:0071779	G1/S transition checkpoint										27
GO:0071822	protein complex subunit organization				115						162
GO:0071840	cellular component organization or biogenesis										584
GO:0071841	cellular component organization or biogenesis at cellular level										472
GO:0071842	cellular component organization at cellular level										453
GO:0071843	cellular component biogenesis at cellular level										63
GO:0071845	cellular component disassembly at cellular level				60				44		95
GO:0072395	signal transduction involved in cell cycle checkpoint										26
GO:0072401	signal transduction involved in DNA integrity checkpoint										26
GO:0072404	signal transduction involved in G1/S transition checkpoint										26
GO:0072413	signal transduction involved in mitotic cell cycle checkpoint										26
GO:0072422	signal transduction involved in DNA damage checkpoint										26
GO:0072431	signal transduction involved in mitotic cell cycle G1/S transition DNA damage checkpoint										26
GO:0072474	signal transduction involved in mitotic cell cycle G1/S checkpoint										26
GO:0072594	establishment of protein localization to organelle										27
GO:0090257	regulation of muscle system process		21
GO:0090304	nucleic acid metabolic process										717
GO:2000045	regulation of G1/S transition of mitotic cell cycle										28

## Sheet: CC UP 5-8
UP-REGULATORY GENES ENRICHMENT.SCORE（5,8]
GO.ID	Term	AE-1 vs Con	AE-1 vs Stable	AE-3 vs AE-1	AE-3 vs Con	AE-3 vs Stable	AE-10 vs AE-1	AE-10 vs AE-3	AE-10 vs Con	AE-10 vs Stable	Stable vs Con
GO:0000267	cell fraction		191				107
GO:0000313	organellar ribosome									22
GO:0000323	lytic vacuole		61			73				83
GO:0000502	proteasome complex		23			24				28
GO:0001726	ruffle	24							25
GO:0005581	collagen	15			17						15
GO:0005604	basement membrane	25			26				23		23
GO:0005615	extracellular space		147
GO:0005623	cell					2387
GO:0005624	membrane fraction	133			146		79	80	132
GO:0005625	soluble fraction		74			89				96
GO:0005626	insoluble fraction	137			151		84	85	139
GO:0005634	nucleus		781			932
GO:0005635	nuclear envelope		57							76
GO:0005654	nucleoplasm		213			255				283
GO:0005737	cytoplasm	944						532
GO:0005739	mitochondrion		227			272
GO:0005746	mitochondrial respiratory chain									28
GO:0005761	mitochondrial ribosome									22
GO:0005764	lysosome		61			73				83
GO:0005768	endosome							52
GO:0005773	vacuole		71			87
GO:0005783	endoplasmic reticulum	161				222				232
GO:0005788	endoplasmic reticulum lumen		31
GO:0005789	endoplasmic reticulum membrane		122
GO:0005794	Golgi apparatus		178			207				226
GO:0005829	cytosol				298				285
GO:0005839	proteasome core complex		11			12				14
GO:0005886	plasma membrane						304
GO:0005887	integral to plasma membrane	184			193				189
GO:0005911	cell-cell junction								48
GO:0005924	cell-substrate adherens junction	29
GO:0005925	focal adhesion	28							32
GO:0009986	cell surface		81		81			45	75
GO:0012505	endomembrane system	217				303				327
GO:0015629	actin cytoskeleton								62
GO:0016020	membrane	886			986			513	923		925
GO:0016023	cytoplasmic membrane-bounded vesicle	116	132
GO:0016323	basolateral plasma membrane	55							55
GO:0016469	proton-transporting two-sector ATPase complex					21
GO:0016607	nuclear speck		36
GO:0019866	organelle inner membrane		73
GO:0019898	extrinsic to membrane					35
GO:0030054	cell junction				108
GO:0030055	cell-substrate junction	30				37	20
GO:0030141	stored secretory granule	44
GO:0030529	ribonucleoprotein complex		105			117				135
GO:0031012	extracellular matrix		79
GO:0031226	intrinsic to plasma membrane	188			197				193
GO:0031410	cytoplasmic vesicle	127	144		127	160			122
GO:0031965	nuclear membrane									49
GO:0031967	organelle envelope					155
GO:0031975	envelope		143			156
GO:0031981	nuclear lumen		288			341
GO:0031982	vesicle	130	149		131	165			127
GO:0031988	membrane-bounded vesicle	117	133
GO:0033178	proton-transporting two-sector ATPase complex, catalytic domain					12
GO:0042175	nuclear membrane-endoplasmic reticulum network		125
GO:0042470	melanosome	25								35
GO:0042613	MHC class II protein complex						7
GO:0043234	protein complex		448
GO:0044420	extracellular matrix part								34
GO:0044421	extracellular region part		186				93	92
GO:0044425	membrane part										778
GO:0044429	mitochondrial part		126
GO:0044432	endoplasmic reticulum part		146			160
GO:0044433	cytoplasmic vesicle part	59
GO:0044444	cytoplasmic part				785
GO:0044464	cell part					2387
GO:0045095	keratin filament										28
GO:0045121	membrane raft							25	40
GO:0048770	pigment granule	25								35
GO:0070161	anchoring junction	44
GO:0071944	cell periphery						307

## Sheet: CC UP 8-10
UP-REGULATORY GENES ENRICHMENT.SCORE（8,10]
GO.ID	Term	AE-1 vs Con	AE-1 vs Stable	AE-3 vs AE-1	AE-3 vs Con	AE-3 vs Stable	AE-10 vs AE-1	AE-10 vs AE-3	AE-10 vs Con	AE-10 vs Stable	Stable vs Con
GO:0000267	cell fraction				194	232		108	184	254
GO:0005578	proteinaceous extracellular matrix								71		71
GO:0005615	extracellular space										140
GO:0005737	cytoplasm						560
GO:0005740	mitochondrial envelope									134
GO:0005743	mitochondrial inner membrane									98
GO:0005759	mitochondrial matrix									86
GO:0005773	vacuole									95
GO:0005783	endoplasmic reticulum		199
GO:0005882	intermediate filament										50
GO:0005886	plasma membrane	532			590
GO:0005912	adherens junction	42			47
GO:0005924	cell-substrate adherens junction				35				34
GO:0005925	focal adhesion				34
GO:0009986	cell surface	79
GO:0012505	endomembrane system		272
GO:0016323	basolateral plasma membrane				62
GO:0030054	cell junction								112
GO:0030055	cell-substrate junction				38				35
GO:0031090	organelle membrane					410
GO:0031966	mitochondrial membrane									128
GO:0031967	organelle envelope		142
GO:0031981	nuclear lumen									389
GO:0042470	melanosome		35			38
GO:0043234	protein complex									597
GO:0044420	extracellular matrix part	37			39						36
GO:0044428	nuclear part		349			408
GO:0044444	cytoplasmic part								760
GO:0044455	mitochondrial membrane part									52
GO:0045111	intermediate filament cytoskeleton										53
GO:0045121	membrane raft						30
GO:0048770	pigment granule		35			38
GO:0070013	intracellular organelle lumen					431
GO:0070161	anchoring junction				51
GO:0071944	cell periphery	540			596				565

## Sheet: CC UP 10-
UP-REGULATORY GENES ENRICHMENT.SCORE>10
GO.ID	Term	AE-1 vs Con	AE-1 vs Stable	AE-3 vs AE-1	AE-3 vs Con	AE-3 vs Stable	AE-10 vs AE-1	AE-10 vs AE-3	AE-10 vs Con	AE-10 vs Stable	Stable vs Con
GO:0000267	cell fraction	180
GO:0005576	extracellular region	345	283		373				331		371
GO:0005578	proteinaceous extracellular matrix	75			82
GO:0005615	extracellular space	151			168				155
GO:0005622	intracellular					2029				2313
GO:0005623	cell									2690
GO:0005634	nucleus									1069
GO:0005737	cytoplasm				1094	1629			1045	1820
GO:0005739	mitochondrion									367
GO:0005829	cytosol					482				514
GO:0005886	plasma membrane		460					324	559		579
GO:0005887	integral to plasma membrane		165								204
GO:0005912	adherens junction								47
GO:0019866	organelle inner membrane									109
GO:0031012	extracellular matrix	95			104				92		85
GO:0031090	organelle membrane									467
GO:0031226	intrinsic to plasma membrane										206
GO:0031967	organelle envelope									206
GO:0031974	membrane-enclosed lumen					454				528
GO:0031975	envelope									207
GO:0032991	macromolecular complex					683				734
GO:0043226	organelle					1673				1914
GO:0043227	membrane-bounded organelle					1558				1793
GO:0043229	intracellular organelle					1671				1913
GO:0043231	intracellular membrane-bounded organelle					1556				1792
GO:0043233	organelle lumen					445				518
GO:0043234	protein complex					558
GO:0044421	extracellular region part	201	147		220				202		191
GO:0044422	organelle part					1027				1143
GO:0044424	intracellular part					2001				2278
GO:0044428	nuclear part									475
GO:0044429	mitochondrial part									198
GO:0044444	cytoplasmic part					1216				1348
GO:0044446	intracellular organelle part					1014				1135
GO:0044459	plasma membrane part	333	265		357		192	198	338		343
GO:0044464	cell part									2690
GO:0070013	intracellular organelle lumen									508
GO:0070161	anchoring junction								51
GO:0071944	cell periphery		466					327			583

## Sheet: CC DOWN 2-3
DOWN-REGULATORY GENES ENRICHMENT.SCORE(2,3]
GO.ID	Term	AE-1 vs Con	AE-1 vs Stable	AE-3 vs AE-1	AE-3 vs Con	AE-3 vs Stable	AE-10 vs AE-1	AE-10 vs AE-3	AE-10 vs Con	AE-10 vs Stable	Stable vs Con
GO:0000267	cell fraction					144	74
GO:0000785	chromatin										46
GO:0001726	ruffle			6
GO:0001750	photoreceptor outer segment					8			6	8
GO:0001772	immunological synapse		5		5
GO:0005578	proteinaceous extracellular matrix		40			51
GO:0005604	basement membrane							9
GO:0005624	membrane fraction					112
GO:0005625	soluble fraction										61
GO:0005626	insoluble fraction					115	60
GO:0005637	nuclear inner membrane										10
GO:0005643	nuclear pore										19
GO:0005689	U12-type spliceosomal complex										9
GO:0005694	chromosome										97
GO:0005730	nucleolus	62
GO:0005737	cytoplasm				818
GO:0005741	mitochondrial outer membrane			6							23
GO:0005744	mitochondrial inner membrane presequence translocase complex										6
GO:0005779	integral to peroxisomal membrane				5
GO:0005783	endoplasmic reticulum			30
GO:0005794	Golgi apparatus										156
GO:0005829	cytosol			51
GO:0005856	cytoskeleton			40		199
GO:0005865	striated muscle thin filament		5
GO:0005882	intermediate filament							19
GO:0005886	plasma membrane	384
GO:0005887	integral to plasma membrane			33
GO:0005891	voltage-gated calcium channel complex		6				5
GO:0005892	nicotinic acetylcholine-gated receptor-channel complex									7
GO:0005902	microvillus						8
GO:0009897	external side of plasma membrane		23				16
GO:0009986	cell surface		46	16	53				43
GO:0015030	Cajal body										13
GO:0015629	actin cytoskeleton			12
GO:0015630	microtubule cytoskeleton										113
GO:0015934	large ribosomal subunit								12
GO:0016020	membrane						408	407
GO:0016021	integral to membrane							296
GO:0016023	cytoplasmic membrane-bounded vesicle			22
GO:0016323	basolateral plasma membrane									42
GO:0016459	myosin complex					16
GO:0019867	outer membrane			8
GO:0019898	extrinsic to membrane							12
GO:0022625	cytosolic large ribosomal subunit								9
GO:0030016	myofibril		18							24
GO:0030017	sarcomere		18							21
GO:0030139	endocytic vesicle				15
GO:0030141	stored secretory granule			10		37				37
GO:0030424	axon			9
GO:0030496	midbody										14
GO:0030663	COPI coated vesicle membrane										6
GO:0030667	secretory granule membrane			4			7
GO:0030672	synaptic vesicle membrane		9
GO:0030863	cortical cytoskeleton						6
GO:0031012	extracellular matrix		47			59
GO:0031224	intrinsic to membrane								453
GO:0031225	anchored to membrane						15		19
GO:0031226	intrinsic to plasma membrane			34
GO:0031231	intrinsic to peroxisomal membrane				5
GO:0031300	intrinsic to organelle membrane				26
GO:0031301	integral to organelle membrane				23
GO:0031674	I band					14
GO:0031967	organelle envelope			22
GO:0031968	organelle outer membrane			7							28
GO:0031975	envelope			22
GO:0031982	vesicle			23
GO:0031988	membrane-bounded vesicle			22
GO:0032994	protein-lipid complex							6
GO:0033177	proton-transporting two-sector ATPase complex, proton-transporting domain										8
GO:0033178	proton-transporting two-sector ATPase complex, catalytic domain										8
GO:0033267	axon part			6	16
GO:0034358	plasma lipoprotein particle							6
GO:0034364	high-density lipoprotein particle							5
GO:0034704	calcium channel complex						6		7
GO:0034708	methyltransferase complex										16
GO:0035097	histone methyltransferase complex										16
GO:0042470	melanosome										22
GO:0042611	MHC protein complex				9
GO:0042613	MHC class II protein complex	5			5
GO:0042995	cell projection		91			121				124
GO:0043235	receptor complex	22				26
GO:0043292	contractile fiber									25
GO:0043679	axon terminus		10
GO:0044304	main axon				7
GO:0044425	membrane part							349
GO:0044427	chromosomal part										81
GO:0044430	cytoskeletal part					140
GO:0044433	cytoplasmic vesicle part			13			28
GO:0044444	cytoplasmic part			128	596
GO:0044449	contractile fiber part		18							23
GO:0044452	nucleolar part	7									9
GO:0044456	synapse part		41			47
GO:0044459	plasma membrane part			53
GO:0044463	cell projection part		50			65
GO:0045111	intermediate filament cytoskeleton							20
GO:0045121	membrane raft				26
GO:0045177	apical part of cell						20	20
GO:0045202	synapse		51			61				64
GO:0046658	anchored to plasma membrane									7
GO:0046930	pore complex										22
GO:0048770	pigment granule										22
GO:0071339	MLL1 complex										10
GO:0071565	nBAF complex										6
GO:0071944	cell periphery	394
GO:0072372	primary cilium								9

[truncated: 8 more sheets: CC DOWN 3-5, CC DOWN 5-, MF UP 5-8, MF UP 8-10, MF UP 10-, MF DWON 2-3, MF DOWN 3-5, MF DOWN 5-]
